# Supplementary material for: Towards clustered carbonyl cations [M3(CO)14]2+ (M = Ru, Os): the need for innocent deelectronation
Source: PubMed Central journal article supplement — Chem Sci. 2022 Jul 7;13(32):9147–58. doi: 10.1039/d2sc02358j (PMC9384829; doi:10.1039/d2sc02358j), 2022-07-07
Supplement: SC-013-D2SC02358J-s001.pdf [file SC-013-D2SC02358J-s001.pdf]

## Table of Contents

|                                                                                                                                                                                                 |    |
|-------------------------------------------------------------------------------------------------------------------------------------------------------------------------------------------------|----|
| 1. General procedure .....                                                                                                                                                                      | 3  |
| 2. Experimental .....                                                                                                                                                                           | 5  |
| 3. Shift of the Bond Lengths upon Deelectronation.....                                                                                                                                          | 8  |
| 4. Absence of Nitrosyl-Ligands in [2] <sup>+</sup> .....                                                                                                                                        | 9  |
| 5. NMR spectra .....                                                                                                                                                                            | 10 |
| [Ru <sub>3</sub> (CO) <sub>14</sub> ] <sup>2+</sup> [Al(OR <sup>F</sup> ) <sub>4</sub> ] <sup>-2</sup> in 1,2,3,4-Tetrafluorobenzene .....                                                      | 10 |
| [Os <sub>3</sub> (CO) <sub>14</sub> ] <sup>2+</sup> [Al(OR <sup>F</sup> ) <sub>4</sub> ] <sup>-2</sup> in 1,2,3,4-Tetrafluorobenzene .....                                                      | 11 |
| [C <sub>14</sub> F <sub>8</sub> Cl <sub>2</sub> ] <sup>+</sup> [F{Al(OR <sup>F</sup> ) <sub>3</sub> ] <sub>2</sub> ] <sup>-</sup> in 1,2,3,4-Tetrafluorobenzene.....                            | 13 |
| 6. Vibrational Spectroscopy .....                                                                                                                                                               | 14 |
| 7. Vibrational Modes of the 50 VE Trimetal Tetradecacarbonyls .....                                                                                                                             | 20 |
| 8. Determination of the force constants.....                                                                                                                                                    | 22 |
| 9. pXRD.....                                                                                                                                                                                    | 23 |
| [6] <sup>+</sup> [F{Al(OR <sup>F</sup> ) <sub>3</sub> ] <sub>2</sub> ] <sup>-</sup> .....                                                                                                       | 23 |
| [7a/7b] <sup>2+</sup> [Al(OR <sup>F</sup> ) <sub>4</sub> ] <sup>-2</sup> ·x C <sub>6</sub> F <sub>4</sub> H <sub>2</sub> (x < 2) .....                                                          | 24 |
| 10. EPR-Spectroscopy .....                                                                                                                                                                      | 25 |
| 11. Cyclic Voltammetry .....                                                                                                                                                                    | 26 |
| 12. EDA-NOCV .....                                                                                                                                                                              | 28 |
| 13. QTAIM Results.....                                                                                                                                                                          | 29 |
| [Os <sub>3</sub> (CO) <sub>14</sub> ] <sup>2+</sup> .....                                                                                                                                       | 29 |
| [Ru <sub>3</sub> (CO) <sub>14</sub> ] <sup>2+</sup> .....                                                                                                                                       | 31 |
| 14. scXRD-Data.....                                                                                                                                                                             | 33 |
| [C <sub>14</sub> F <sub>8</sub> Cl <sub>2</sub> ] <sup>+</sup> [F{Al(OR <sup>F</sup> ) <sub>3</sub> ] <sub>2</sub> ] <sup>-</sup> .....                                                         | 33 |
| [NRu <sub>4</sub> (CO) <sub>13</sub> ] <sup>+</sup> [Al(OR <sup>F</sup> ) <sub>4</sub> ] <sup>-</sup> .....                                                                                     | 34 |
| [Ag{Ru <sub>3</sub> (CO) <sub>12</sub> ] <sub>2</sub> ] <sup>+</sup> [Al(OR <sup>F</sup> ) <sub>4</sub> ] <sup>-</sup> ·C <sub>6</sub> F <sub>4</sub> H <sub>2</sub> .....                      | 35 |
| [Ag{Os <sub>3</sub> (CO) <sub>12</sub> ] <sub>2</sub> ] <sup>+</sup> [F{Al(OR <sup>F</sup> ) <sub>3</sub> ] <sub>2</sub> ] <sup>-</sup> ·1.5 C <sub>6</sub> F <sub>4</sub> H <sub>2</sub> ..... | 36 |
| [Ru(CO) <sub>5</sub> ] <sup>+</sup> [Al(OR <sup>F</sup> ) <sub>4</sub> ] <sup>-</sup> .....                                                                                                     | 37 |
| [Ru <sub>2</sub> (CO) <sub>6</sub> ] <sub>3</sub> ] <sup>+</sup> [Al(OR <sup>F</sup> ) <sub>4</sub> ] <sup>-</sup> .....                                                                        | 38 |
| [Ru <sub>3</sub> (CO) <sub>14</sub> ] <sup>2+</sup> [Al(OR <sup>F</sup> ) <sub>4</sub> ] <sup>-2</sup> ·2 C <sub>6</sub> F <sub>4</sub> H <sub>2</sub> .....                                    | 39 |
| [Os <sub>3</sub> (CO) <sub>14</sub> ] <sup>2+</sup> [Al(OR <sup>F</sup> ) <sub>4</sub> ] <sup>-2</sup> ·2 C <sub>6</sub> F <sub>4</sub> H <sub>2</sub> .....                                    | 40 |
| [Ru <sub>3</sub> (CO) <sub>14</sub> ] <sup>2+</sup> [F{Al(OR <sup>F</sup> ) <sub>3</sub> ] <sub>2</sub> ] <sup>-</sup> ·C <sub>6</sub> F <sub>4</sub> H <sub>2</sub> .....                      | 41 |
| [Os <sub>3</sub> (CO) <sub>14</sub> ] <sup>2+</sup> [F{Al(OR <sup>F</sup> ) <sub>3</sub> ] <sub>2</sub> ] <sup>-</sup> ·C <sub>6</sub> F <sub>4</sub> H <sub>2</sub> .....                      | 42 |
| 15. DFT .....                                                                                                                                                                                   | 43 |
| [NRu <sub>4</sub> (CO) <sub>12</sub> (μ <sub>2</sub> -NO)] <sup>+</sup> .....                                                                                                                   | 43 |
| [NRu <sub>4</sub> (CO) <sub>12</sub> (μ <sub>2</sub> -CO)] <sup>+</sup> .....                                                                                                                   | 43 |

|                                                           |    |
|-----------------------------------------------------------|----|
| Ru(CO) <sub>5</sub> .....                                 | 45 |
| Os(CO) <sub>5</sub> .....                                 | 46 |
| [Ru <sub>3</sub> (CO) <sub>14</sub> ] <sup>2+</sup> ..... | 48 |
| [Os <sub>3</sub> (CO) <sub>14</sub> ] <sup>2+</sup> ..... | 51 |
| [Ru(CO) <sub>6</sub> ] <sup>2+</sup> .....                | 54 |
| [Os(CO) <sub>6</sub> ] <sup>2+</sup> .....                | 55 |
| [Ru(CO) <sub>5</sub> I] <sup>+</sup> .....                | 57 |
| Anthracene <sup>Hal</sup> .....                           | 58 |
| [Anthracene <sup>Hal</sup> ] <sup>+</sup> .....           | 60 |
| 16. References .....                                      | 64 |
| References .....                                          | 64 |

## 1. General procedure

All manipulations were carried out by using standard Schlenk technique or a nitrogen filled glovebox ( $O_2/H_2O < 0.1$  ppm). All the reactions were performed in Schlenk tubes with grease free PTFE-valves. The solvent 1,2,3,4-Tetrafluorobenzene (TFB,  $C_6F_4H_2$ , from Fluorochem) was stirred over a few days over calcium hydride ( $CaH_2$ ) and distilled. The distillate was stirred over  $Ag^+[Al(OR^F)_4]^-$  and condensed to remove traces of less fluorinated benzenes. This leads to a minor contamination of  $R^F OH$ , which does not affect the reactions. *n*-pentane was dried using a Grubbs apparatus. TFB and *n*-pentane were stored over 3 Å molar sieves. Iodine ( $I_2$ , Acros) was sublimed under static vacuum before use. Triruthenium dodecacarbonyl (Sigma Aldrich), 9,10-Dichlorooctafluoroanthracene (Sigma Aldrich) and triosmium dodecacarbonyl (ABCR) were bought from commercial sources.  $Ag^+[WCA]^-$  and  $[NO]^+[WCA]^-$  were synthesized according to literature procedures.<sup>1</sup>

### Vibrational Spectroscopy

FTIR spectra were recorded inside a glovebox with a Bruker ALPHA equipped with QuickSnap Eco ATR module and ZnSe crystal. The spectra were measured at RT in the range of 4000-550  $cm^{-1}$  with 32 scans and a resolution of 2  $cm^{-1}$ . The data were processed with the Bruker OPUS 7.5 software package and, if not stated otherwise, a baseline correction with 3 iterations was performed. FT Raman spectra were recorded with a VERTEX 70 with Bruker RAM II Modul (1064 nm exciting line of a Nd-YAG laser) and liquid nitrogen cooled Ge detector. The samples were flame-sealed in soda-lime glass Pasteur pipettes and were measured at RT in the range of 4000-80  $cm^{-1}$  with up to 10,000 scans and a resolution of 4  $cm^{-1}$ . The data were processed with the Bruker OPUS 7.5 software package. The graphical representations were created with OriginPro 2021.

### NMR Spectroscopy

NMR spectra were recorded at RT either on a Bruker Avance II Widebore 400 MHz, Bruker Avance III HD 300 MHz or Bruker Avance DPX 200 MHz. The samples were dissolved with 4FB (0.6 ml) in a 5 mm thick-walled NMR tube with J. Young PTFE valve. The spectra were calibrated by using the  $^1H$  signal of the solvent 4FB ( $\delta = 6.97$  ppm, rel. to Tetramethylsilane). The field corrections of other nuclei were adjusted accordingly. Typically, small impurities of  $HOC(CF_3)_3$  were detected in the  $^{19}F$  NMR at  $-76.0$  ppm. The MestReNova software package was used for measuring, processing and creation of the graphical representations of the spectra.  $^1H$  and  $^{13}C$  NMR spectra are referenced against TMS and  $^{19}F$  NMR spectra against  $CFCl_3$ .

### EPR Spectroscopy

The continuous wave (cw) EPR spectrum of a solution of  $[6]^+[F\{Al(OR^F)_3\}_2]^-$  in TFB was recorded at the X-band (9.75 GHz) on a Bruker EMXnano benchtop EPR spectrometer at room temperature. The modulation frequency was set to 100 kHz and the modulation amplitude to 0.01 mT at a microwave power of 1 mW (20 dB). After data acquisition, the spectrum was baseline-corrected, frequency-corrected to 9.75 GHz and field-corrected using a carbon fibre standard with  $g = 2.002644$ .<sup>2</sup> The numerical simulation of the experimental spectrum using EasySpin functions in MATLAB yielded  $g = 2.0065$ .<sup>3</sup> The hyperfine coupling constants were calculated with DFT by using the ORCA program package version 4.0.<sup>4</sup> The structure was optimised using B3LYP/def2-TZVP and the hyperfine coupling constants were then calculated at the B3LYP/EPR-II (6-31G\*\* for Cl) level of theory.

### Single Crystal X-ray Diffraction

The data were collected on a Bruker D8 VENTURE dual wavelength Mo/Cu three-circle diffractometer with a microfocus sealed X-ray tube using mirror optics as monochromator and a Bruker PHOTON III detector. Single crystals were selected at RT under perfluoropolyalkylether oil (AB128330, ABCR GmbH & Co. KG), mounted on CryoLoops with a diameter of 0.1 to 0.2 mm and shock-cooled using an Oxford Cryostream 800 low temperature device. The data were gathered at 100(2) K using Mo  $K_\alpha$  radiation

( $\lambda = 0.71073 \text{ \AA}$ ). All data were integrated with SAINT (version 8.38A) and a multi-scan absorption correction using SADABS or TWINABS was applied. The structures were solved by direct methods using SHELXT<sup>5</sup> and refined by full-matrix least-squares methods against  $F^2$  by SHELXL-2018/3<sup>6</sup> using the GUI software ShelXle.<sup>7</sup> Disordered moieties were refined using bond lengths restraints and displacement parameter restraints and were modelled with the program DSR.<sup>8</sup> The gathered data were finalized with the tool FinalCif.<sup>9</sup> The graphical representations of the crystal structures were generated with Mercury (version 4.0).<sup>10</sup> Crystallographic data for the structures reported in this paper have been deposited with the Cambridge Crystallographic Data Centre.<sup>11</sup> Copies of the data can be obtained free of charge from the Cambridge Crystallographic Data Centre via [www.ccdc.cam.ac.uk/structures](http://www.ccdc.cam.ac.uk/structures).

### Powder X-ray Diffraction

Powder diffractograms were recorded on a STOE STADI P powder diffractometer with Mo  $K_{\alpha 1}$  radiation ( $\lambda = 0.709300 \text{ \AA}$ ), Ge-(111) monochromator and Mythen 1K detector at 100(10) K. The samples were sealed in a 0.5 mm thick capillary (Hilgenberg GmbH, wall thickness 0.01 mm) with silicon grease. Data acquisition, processing, and the calculation of powder diffractograms from single-crystal data was performed using the STOE WinXPOW<sup>®</sup> package.

### Computational Details

Geometry optimizations were performed with the TURBOMOLE software<sup>12</sup> (v7.2 or v7.5) using the DFT functionals B3LYP<sup>13</sup> with the def2-TZVPP<sup>14</sup> basis set, the resolution-of-identity (RI) approximation,<sup>15</sup> dispersion correction (D3BJ),<sup>16</sup> a fine integration grid (m4 or 5 for NMR chemical shift calculations) and the default SCF convergence criteria ( $10^{-6}$  a.u.). All structures were checked for proper spin occupancies and imaginary frequencies with the integrated *EIGER* and *AOFORC*<sup>17</sup> modules. IR and Raman spectra were simulated on B3LYP(D3BJ)/def2-TZVPP level with a scaling factor of 0.968 for all TMCCs, the spectra for the other molecules were simulated without scaling factor. QTAIM-charges were calculated with MultiWFN.<sup>18</sup> The EDA-NOCV analyses were carried out with the ADF software package.<sup>19</sup>

## 2. Experimental

### **[Ru<sub>4</sub>N(CO)<sub>13</sub>]<sup>+</sup>[Al(OC(CF<sub>3</sub>)<sub>3</sub>)<sub>4</sub>]<sup>-</sup> abbreviated as [2]<sup>+</sup>[Al(OR<sup>F</sup>)<sub>4</sub>]<sup>-</sup>**

[NO]<sup>+</sup>[Al(OC(CF<sub>3</sub>)<sub>3</sub>)<sub>4</sub>]<sup>-</sup> (100 mg, 100 μmol, 1.0 eq.) and Ru<sub>3</sub>(CO)<sub>12</sub> (63 mg, 100 μmol, 1.0 eq.) were filled in a Schlenk-tube. 1,2,3,4-Tetrafluorobenzene (2 mL) was added to the mixture leading to a brown solution, which was layered with *n*-pentane (20 mL). Slow diffusion over the course of two days leads to some red crystals, which have been identified as [Ru<sub>4</sub>N(CO)<sub>13</sub>]<sup>+</sup>[Al(OC(CF<sub>3</sub>)<sub>3</sub>)<sub>4</sub>]<sup>-</sup> with scXRD and IR. The bulk product was an undefined mixture. The synthesis was not optimized and no yield was determined.

IR (ATR, in cm<sup>-1</sup>): ν 2042 (m), 2031 (m), 1513 (vw), 1522 (vw), 1351 (vw), 1297 (w), 1274 (m), 1239 (s), 1208 (vs), 1167 (m), 1046 (vw), 968 (vs), 831 (vw), 805 (vw), 756 (vw), 745 (vw), 726 (s), 682 (vw), 617 (vw), 607 (vw), 585 (vw), 561 (vw).

### **[Ag{Ru<sub>3</sub>(CO)<sub>12</sub>}<sub>2</sub>]<sup>+</sup>[Al(OC(CF<sub>3</sub>)<sub>3</sub>)<sub>4</sub>]<sup>-</sup> abbreviated as [3a]<sup>+</sup>[Al(OR<sup>F</sup>)<sub>4</sub>]<sup>-</sup>**

Ag<sup>+</sup>[Al(OC(CF<sub>3</sub>)<sub>3</sub>)<sub>4</sub>]<sup>-</sup> (50 mg, 47 μmol, 1.0 eq.) and Ru<sub>3</sub>(CO)<sub>12</sub> (59 mg, 93 μmol, 2.0 eq.) were filled in a Schlenk-tube and 1,2,3,4-Tetrafluorobenzene (2 mL) was added to the mixture leading to an orange solution. The mixture was layered with *n*-pentane (20 mL). Slow diffusion over the course of two days led to red crystals in 92 % yield, which were identified as [Ag{Ru<sub>3</sub>(CO)<sub>12</sub>}<sub>2</sub>]<sup>+</sup>[Al(OC(CF<sub>3</sub>)<sub>3</sub>)<sub>4</sub>]<sup>-</sup> *via* scXRD.

### **[Ag{Ru<sub>3</sub>(CO)<sub>12</sub>}<sub>2</sub>]<sup>+</sup>[F{Al(OC(CF<sub>3</sub>)<sub>3</sub>)<sub>3</sub>}<sub>2</sub>]<sup>-</sup> abbreviated as [3a]<sup>+</sup>[F{Al(OR<sup>F</sup>)<sub>3</sub>}<sub>2</sub>]<sup>-</sup>**

The reaction was performed analogously to [3a]<sup>+</sup>[Al(OR<sup>F</sup>)<sub>4</sub>]<sup>-</sup> but Ag<sup>+</sup>[F{Al(OC(CF<sub>3</sub>)<sub>3</sub>)<sub>3</sub>}<sub>2</sub>]<sup>-</sup> was used instead of Ag<sup>+</sup>[Al(OC(CF<sub>3</sub>)<sub>3</sub>)<sub>4</sub>]<sup>-</sup>.

IR (ATR, in cm<sup>-1</sup>): ν 2130 (w), 2084 (vs), 2068 (s), 2052 (s), 2034 (m), 2017 (vs), 1353 (w), 1301 (m), 1278 (s), 1243 (vs), 1214 (vs), 1176 (m), 862 (w), 974 (vs), 728 (vs), 639 (w), 584 (s), 567 (s), 558 (vs).

Raman (1064 nm, in cm<sup>-1</sup>): ν 2140 (w), 2119 (vw), 2092 (vw), 2062 (w), 2028 (w), 2011 (vw), 753 (vw), 595 (vw), 573 (vw), 518 (vw), 457 (vw), 424 (vw), 372 (vw), 303 (vw), 268 (vw), 171 (vs), 148 (m), 102 (vs), 87 (vs).

### **[Ag{Os<sub>3</sub>(CO)<sub>12</sub>}<sub>2</sub>]<sup>+</sup>[Al(OC(CF<sub>3</sub>)<sub>3</sub>)<sub>4</sub>]<sup>-</sup> abbreviated as [3b]<sup>+</sup>[Al(OR<sup>F</sup>)<sub>4</sub>]<sup>-</sup>**

Ag<sup>+</sup>[Al(OC(CF<sub>3</sub>)<sub>3</sub>)<sub>4</sub>]<sup>-</sup> (27 mg, 25 μmol, 1.0 eq.) and Os<sub>3</sub>(CO)<sub>12</sub> (45 mg, 50 μmol, 2.0 eq.) were filled in a Schlenk-tube and 1,2,3,4-Tetrafluorobenzene (2 mL) was added to the mixture leading to an orange solution. Slow diffusion over the course of two days leads to red crystals in 87 % yield, which were identified as [Ag{Os<sub>3</sub>(CO)<sub>12</sub>}<sub>2</sub>]<sup>+</sup>[Al(OC(CF<sub>3</sub>)<sub>3</sub>)<sub>4</sub>]<sup>-</sup> *via* scXRD, the structure had however severe disorders and is therefore not uploaded to the CCDC.

### **[Ag{Os<sub>3</sub>(CO)<sub>12</sub>}<sub>2</sub>]<sup>+</sup>[F{Al(OC(CF<sub>3</sub>)<sub>3</sub>)<sub>3</sub>}<sub>2</sub>]<sup>-</sup> abbreviated as [3b]<sup>+</sup>[F{Al(OR<sup>F</sup>)<sub>3</sub>}<sub>2</sub>]<sup>-</sup>**

The reaction was performed analogously to [3b]<sup>+</sup>[Al(OR<sup>F</sup>)<sub>4</sub>]<sup>-</sup> but Ag<sup>+</sup>[F{Al(OC(CF<sub>3</sub>)<sub>3</sub>)<sub>3</sub>}<sub>2</sub>]<sup>-</sup> was used instead of Ag<sup>+</sup>[Al(OC(CF<sub>3</sub>)<sub>3</sub>)<sub>4</sub>]<sup>-</sup>.

IR (ATR, in cm<sup>-1</sup>): ν 2138 (w), 2091 (s), 2062 (s), 2055 (vs), 2041 (s), 2012 (s), 2003 (vs), 1353 (vw), 1266 (s), 1241 (vs), 1216 (vs), 1177 (m), 972 (vs), 852 (vw), 727 (vs), 692 (vw), 599 (m), 579 (w), 570 (w).

Raman (1064 nm, in cm<sup>-1</sup>): ν 2149 (w), 2092 (vw), 2064 (w), 2030 (vw), 2012 (vw), 1998 (vw), 752 (vw), 539 (vw), 486 (w), 460 (vw), 323 (vw), 145 (s), 107 (vs), 85 (m).

**[Ru(CO)<sub>5</sub>I]<sup>+</sup>[Al(OC(CF<sub>3</sub>)<sub>3</sub>)<sub>4</sub>]<sup>-</sup> and [Ru<sub>2</sub>(CO)<sub>6</sub>I<sub>3</sub>]<sup>+</sup>[Al(OC(CF<sub>3</sub>)<sub>3</sub>)<sub>4</sub>]<sup>-</sup> abbreviated as [4]<sup>+</sup>[Al(OR<sup>F</sup>)<sub>4</sub>]<sup>-</sup> and [5]<sup>+</sup>[Al(OR<sup>F</sup>)<sub>4</sub>]<sup>-</sup>**

Ag<sup>+</sup>[Al(OC(CF<sub>3</sub>)<sub>3</sub>)<sub>4</sub>]<sup>-</sup> (130 mg, 120 μmol, 1.0 eq.) and I<sub>2</sub> (28 mg, 120 μmol, 1.0 eq.) were filled in a Schlenk tube. 1,2,3,4-Tetrafluorobenzene (2 mL) was added to the mixture at -20 °C. Ru<sub>3</sub>(CO)<sub>12</sub> (75 mg, 120 μmol, 1.0 eq.) was added to the solution leading to a red solution and a white precipitate. The mixture was layered with *n*-pentane (20 mL). Slow diffusion over the course of two days leads to some red crystals, which were identified as [Ru(CO)<sub>5</sub>I]<sup>+</sup>[Al(OC(CF<sub>3</sub>)<sub>3</sub>)<sub>4</sub>]<sup>-</sup> and [Ru<sub>2</sub>(CO)<sub>6</sub>I<sub>3</sub>]<sup>+</sup>[Al(OC(CF<sub>3</sub>)<sub>3</sub>)<sub>4</sub>]<sup>-</sup>. The synthesis was not optimized and no yield was determined.

**[C<sub>14</sub>F<sub>8</sub>Cl<sub>2</sub>]<sup>+</sup>[F{Al(OC(CF<sub>3</sub>)<sub>3</sub>)<sub>3</sub>}<sub>2</sub>]<sup>-</sup> abbreviated as [6]<sup>+</sup>[F{Al(OR<sup>F</sup>)<sub>3</sub>}<sub>2</sub>]<sup>-</sup>**

9,10-dichlorooctafluoroanthracene (30 mg, 81 μmol, 1.2 eq.) and [NO]<sup>+</sup>[F{Al(OC(CF<sub>3</sub>)<sub>3</sub>)<sub>2</sub>}<sub>2</sub>]<sup>-</sup> (100 mg, 66 μmol, 1.0 eq.) were filled in a Schlenk tube. 1,2,3,4-Tetrafluorobenzene (2 mL) was added to the mixture leading to an immediate colour change and gas evolution. The green solution was layered with *n*-pentane (20 mL). Slow diffusion over the course of two days leads to analytically pure dark green crystals of [C<sub>14</sub>F<sub>8</sub>Cl<sub>2</sub>]<sup>+</sup>[F{Al(OC(CF<sub>3</sub>)<sub>3</sub>)<sub>3</sub>}<sub>2</sub>]<sup>-</sup>, which are suitable for scXRD (100 mg, 53 μmol, 80 %).

IR (ATR, in cm<sup>-1</sup>): ν 1602 (w), 1573 (vw), 1500 (vw), 1467 (s), 1406 (vw), 1355 (w), 1299 (m), 1276 (s), 1243 (vs), 1204 (vs), 1173 (vs), 1100 (m), 1087 (m), 970 (vs), 858 (m), 726 (vs), 637 (m), 567 (w).

Raman (1064 nm, in cm<sup>-1</sup>): ν 1594 (vw), 1570 (vw), 1543 (vw), 1390 (vs), 1187 (vw), 1594 (vw), 1570 (vw), 1543 (vw), 1021 (vw), 982 (vw), 856 (vw), 371 (vw), 326 (vw), 294 (vw), 250 (vw).

<sup>19</sup>F-NMR (188 MHz, 1,2,3,4-Tetrafluorobenzene) δ = -75.9 (s, CF<sub>3</sub>) ppm.

**[Ru<sub>3</sub>(CO)<sub>14</sub>]<sup>2+</sup>[Al(OC(CF<sub>3</sub>)<sub>3</sub>)<sub>4</sub>]<sup>-2</sup> abbreviated as [7a]<sup>2+</sup>[Al(OR<sup>F</sup>)<sub>4</sub>]<sup>-2</sup>**

9,10-dichlorooctafluoroanthracene (88 mg, 240 μmol, 2.4 eq.) and [NO]<sup>+</sup>[Al(OC(CF<sub>3</sub>)<sub>3</sub>)<sub>4</sub>]<sup>-</sup> (200 mg, 200 μmol, 2.0 eq.) were filled in a Schlenk tube. 1,2,3,4-Tetrafluorobenzene (2 mL) was added to the mixture leading to an immediate colour change and gas evolution. The solution was frozen (-78 °C) and Ru<sub>3</sub>(CO)<sub>12</sub> (63 mg, 100 μmol, 1.0 eq.) was added. The Schlenk tube was evacuated and CO was added (1-2 atm.). The solution was brought to room temperature under vigorous stirring and the intense green colour vanished. The clear brownish solution was layered with *n*-pentane (20 mL). Slow diffusion over the course of two days leads to analytically pure colourless/light yellow crystals of [Ru<sub>3</sub>(CO)<sub>14</sub>]<sup>2+</sup>[Al(OC(CF<sub>3</sub>)<sub>3</sub>)<sub>4</sub>]<sup>-2</sup>·C<sub>6</sub>F<sub>4</sub>H<sub>2</sub>, which are suitable for scXRD (210 mg, 88 μmol, 88 %).

<sup>13</sup>C-NMR (50 MHz, 1,2,3,4-Tetrafluorobenzene) δ = 195.1 (s, 4C, CO<sub>cen</sub>), 185.0 (s, 8C, CO<sub>eq</sub>), 171.5 (s, 2C, CO<sub>ax</sub>), 121.3 (q, CF<sub>3</sub>) ppm.

<sup>19</sup>F-NMR (188 MHz, 1,2,3,4-Tetrafluorobenzene) δ = -76.1 (s, CF<sub>3</sub>) ppm.

IR (ATR, in cm<sup>-1</sup>): ν 2171 (w), 2134 (vw), 2115 (s), 2056 (w), 1351 (vw), 1326 (vw), 1274 (m), 1296 (w), 1213 (vs), 1172 (w), 1045 (w), 969 (vs), 833 (vw), 805 (vw), 755 (vw), 744 (vw), 727 (s), 682 (vw), 615 (vw), 576 (vw), 558 (s).

Raman (1064 nm, in cm<sup>-1</sup>): ν 2195 (m), 2147 (vs), 2139 (s), 2112 (w), 2092 (w).

**[Ru<sub>3</sub>(CO)<sub>14</sub>]<sup>2+</sup>[F{Al(OC(CF<sub>3</sub>)<sub>3</sub>)<sub>3</sub>}<sub>2</sub>]<sup>-2</sup> abbreviated as [7a]<sup>2+</sup>[F{Al(OR<sup>F</sup>)<sub>3</sub>}<sub>2</sub>]<sup>-2</sup>**

The reaction was performed analogously to [7a]<sup>2+</sup>[Al(OR<sup>F</sup>)<sub>4</sub>]<sup>-2</sup> but [NO]<sup>+</sup>[F{Al(OC(CF<sub>3</sub>)<sub>3</sub>)<sub>3</sub>}<sub>2</sub>]<sup>-</sup> was used instead of [NO]<sup>+</sup>[Al(OC(CF<sub>3</sub>)<sub>3</sub>)<sub>4</sub>]<sup>-</sup>. No yield was determined and the product was only analysed *via* scXRD.

**$[\text{Os}_3(\text{CO})_{14}]^{2+}[\text{Al}(\text{OC}(\text{CF}_3)_3)_4]^{-2}$  abbreviated as  $[\mathbf{7b}]^{2+}[\text{Al}(\text{OR}^f)_4]^{-2}$**

9,10-dichlorooctafluoroanthracene (94 mg, 250  $\mu\text{mol}$ , 2.4 eq.) and  $[\text{NO}]^+[\text{Al}(\text{OC}(\text{CF}_3)_3)_4]^-$  (210 mg, 210  $\mu\text{mol}$ , 2.0 eq.) were filled in a Schlenk tube. 1,2,3,4-Tetrafluorobenzene (2 mL) was added to the mixture leading to an immediate colour change and gas evolution. The solution was frozen ( $-78\text{ }^\circ\text{C}$ ) and  $\text{Os}_3(\text{CO})_{12}$  (96 mg, 105  $\mu\text{mol}$ , 1.0 eq.) was added. The Schlenk tube was evacuated and CO was added (1-2 atm.). The solution was brought to room temperature under vigorous stirring and the intense green colour vanished. The clear brownish solution was layered with *n*-pentane (20 mL). Slow diffusion over the course of two days leads to analytically pure colourless/light yellow crystals of  $[\text{Os}_3(\text{CO})_{14}]^{2+}[\text{Al}(\text{OC}(\text{CF}_3)_3)_4]^{-2}\cdot\text{C}_6\text{F}_4\text{H}_2$ , which are suitable for scXRD (230 mg, 75  $\mu\text{mol}$ , 72 %).

$^{13}\text{C}$ -NMR (50 MHz, 1,2,3,4-Tetrafluorobenzene)  $\delta$  = 176.8 (s, 4C,  $\text{CO}_{\text{cen}}$ ), 163.8 (s, 8C,  $\text{eq}\text{-CO}_{\text{eq}}$ ), 121.3 (q,  $\text{CF}_3$ ) ppm.

$^{19}\text{F}$ -NMR (188 MHz, 1,2,3,4-Tetrafluorobenzene)  $\delta$  =  $-76.1$  (s,  $\text{CF}_3$ ) ppm.

IR (ATR, in  $\text{cm}^{-1}$ ):  $\nu$  2179 (w), 2112 (s), 2138 (vw), 2038 (m), 2084 (w), 1511 (w), 1352 (vw), 1296 (w), 1273 (m), 1238 (s), 1212 (vs), 1172 (m), 1045 (vw), 969 (vs), 832 (vw), 805 (vw), 744 (vw), 727 (vs), 682 (vw), 629 (vw), 566 (s).

Raman (1064 nm, in  $\text{cm}^{-1}$ ):  $\nu$  2201 (m), 2136 (vs), 2108 (vw), 2083 (w), 167 (w), 113 (s), 91 (vs).

**$[\text{Os}_3(\text{CO})_{14}]^{2+}[\text{F}\{\text{Al}(\text{OC}(\text{CF}_3)_3)_3\}_2]^{-2}$  abbreviated as  $[\mathbf{7b}]^{2+}[\text{F}\{\text{Al}(\text{OR}^f)_3\}_2]^{-2}$**

The reaction was performed analogously to  $[\mathbf{7b}]^{2+}[\text{Al}(\text{OR}^f)_4]^{-2}$  but  $[\text{NO}]^+[\text{F}\{\text{Al}(\text{OC}(\text{CF}_3)_3)_3\}_2]^-$  was used instead of  $[\text{NO}]^+[\text{Al}(\text{OC}(\text{CF}_3)_3)_4]^-$ . No yield was determined and the product was only analysed *via* scXRD.

### 3. Shift of the Bond Lengths upon Deelectronation

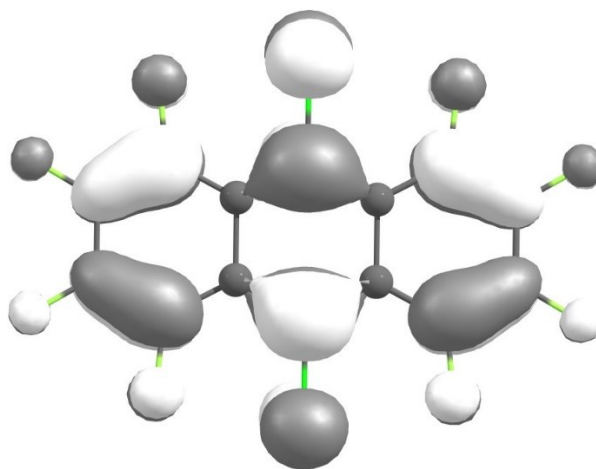

Figure S 1: SOMO of  $[6]^+$  (B3LYP(D3BJ)/def2-TZVPP).

Table S 1: Calculated and experimental bond lengths of neutral, monocationic and dicationic anthracene<sup>Hal</sup>.

|                                              | scXRD <sup>0</sup> | Calc. <sup>0</sup> | scXRD <sup>+</sup> | Calc. <sup>+</sup> |
|----------------------------------------------|--------------------|--------------------|--------------------|--------------------|
| $d(\text{C-Cl})_{\text{ax.}}$ [Å]            | 1.735(3)           | 1.735              | 1.701(3)           | 1.703              |
| $d(\text{C-F})_{\text{ortho}}$ [Å]           | 1.351              | 1.335              | 1.323              | 1.318              |
| $d(\text{C-F})_{\text{meta}}$ [Å]            | 1.339              | 1.330              | 1.335              | 1.312              |
| $d(\text{C}_1\text{-C}_2)_{\text{avg.}}$ [Å] | 1.402              | 1.407              | 1.420              | 1.420              |
| $d(\text{C}_2\text{-C}_2)$ [Å]               | 1.460(4)           | 1.453              | 1.450(3)           | 1.448              |
| $d(\text{C}_2\text{-C}_3)_{\text{avg.}}$ [Å] | 1.427              | 1.428              | 1.419              | 1.416              |
| $d(\text{C}_3\text{-C}_4)_{\text{avg.}}$ [Å] | 1.343              | 1.362              | 1.378              | 1.386              |
| $d(\text{C}_4\text{-C}_4)_{\text{avg.}}$ [Å] | 1.398(5)           | 1.406              | 1.381(4)           | 1.390              |



#### 4. Absence of Nitrosyl-Ligands in [2]<sup>+</sup>

Nitrosyl and carbonyl ligands are difficult to differentiate *via* scXRD. Because the treatment of monometallic TCMs with nitrosyl salts often yields heteroleptic carbonyl/nitrosyl complexes, the presence of a nitrosyl ligand is not unlikely and has to be ruled out carefully.

Possible reaction-sequence:

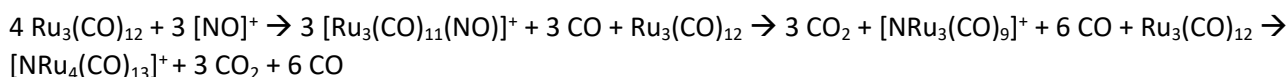

The positive charge gets introduced with the nitrosyl ligand. The reductive carbonylation of the nitrosyl ligand (probably bridging) abstracts the oxygen atom from the nitrosyl ligand, but does not change the overall charge of the fragments. A further reaction with [NO]<sup>+</sup> would result in a multicationic charge. Because the reaction does not proceed stoichiometrically, the possible presence of nitrogen monoxide NO<sup>·</sup> has to be respected. Terminal nitrosyl ligands are leading to vibrational bands between ca. 1950-1750 cm<sup>-1</sup>. The IR-spectrum of the mixture shows no bands in this region (DFT calculations show, that terminal nitrosyl ligands would have a bent geometry; the ligands in the scXRD are linearly bound). The IR spectrum displays however vibrational bands at 1523 and 1513 cm<sup>-1</sup>, which are attributed tetrafluorobenzene here, but could hide a band of a bridging nitrosyl ligand, which could be in the crystallographically analysed molecule. Because the scXRD shows 12 terminal and just one bridging ligand around the {NRu<sub>4</sub>}<sup>+</sup>-core, the complex seen in the scXRD could be either [NRu<sub>4</sub>(CO)<sub>12</sub>(μ<sub>2</sub>-CO)]<sup>+</sup> or [NRu<sub>4</sub>(CO)<sub>12</sub>(μ<sub>2</sub>-NO)]<sup>+</sup>. The ligand is however not symmetrically bridging in both crystallographically independent complex cations. This structural aspect is the most prominent difference in the DFT-optimized structures of these complexes (Table S 2). Due to the *semi* bridging geometry of the relevant ligand, we are sure, that compound [2]<sup>+</sup> does not bear any nitrosyl ligands.

Table S 2: Comparison of the experimental bond lengths of the bridging ligand in [2]<sup>+</sup> with the DFT optimized structures of [NRu<sub>4</sub>(CO)<sub>12</sub>(μ<sub>2</sub>-CO)]<sup>+</sup> and [NRu<sub>4</sub>(CO)<sub>12</sub>(μ<sub>2</sub>-NO)]<sup>+</sup> (B3LYP(B3BJ)/def2-TZVPP).

|                                                                         | Longer Ru-C/N | Shorter Ru-C/N | diff  |
|-------------------------------------------------------------------------|---------------|----------------|-------|
| [2] <sup>+</sup> (N1)                                                   | 2.425         | 2.013          | 0.412 |
| [2] <sup>+</sup> (N2)                                                   | 2.343         | 2.049          | 0.294 |
| [NRu <sub>4</sub> (CO) <sub>13</sub> ] <sup>+</sup>                     | 2.568         | 1.993          | 0.575 |
| [NRu <sub>4</sub> (CO) <sub>12</sub> (μ <sub>2</sub> -NO)] <sup>+</sup> | 2.126         | 2.125          | 0.001 |

## 5. NMR spectra

$[\text{Ru}_3(\text{CO})_{14}]^{2+}[\text{Al}(\text{OR}^{\text{F}})_4]^{-}_2$  in 1,2,3,4-Tetrafluorobenzene

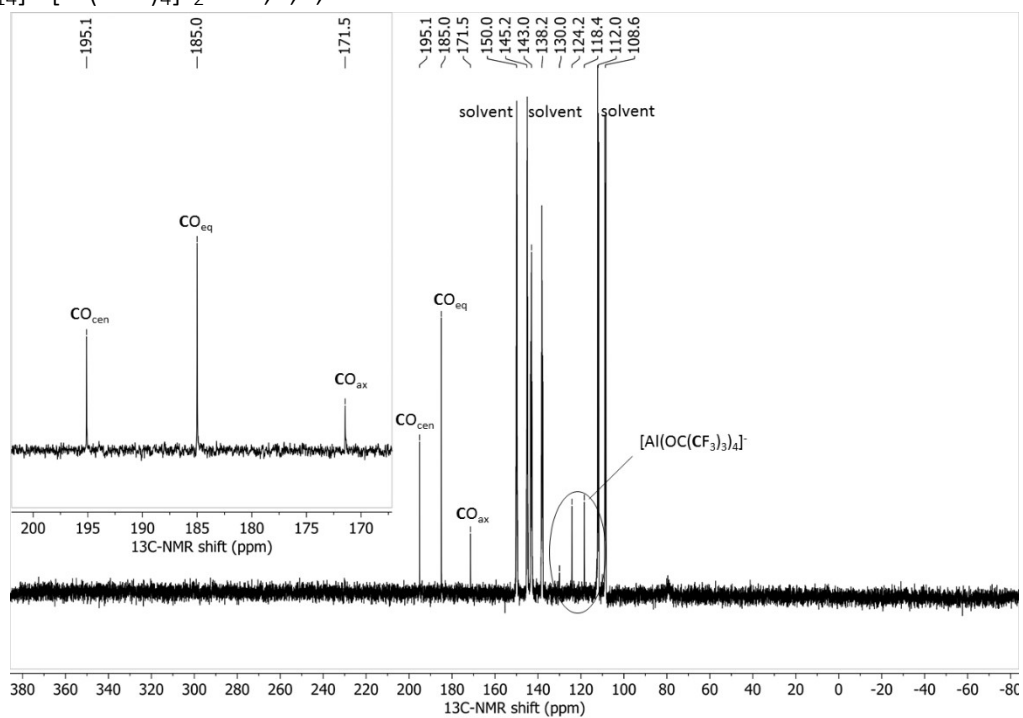

Figure S 2:  $^{13}\text{C}$  NMR spectrum of  $[\mathbf{7a}]^{2+}[\text{Al}(\text{OR}^{\text{F}})_4]^{-}_2$  in 1,2,3,4-Tetrafluorobenzene.

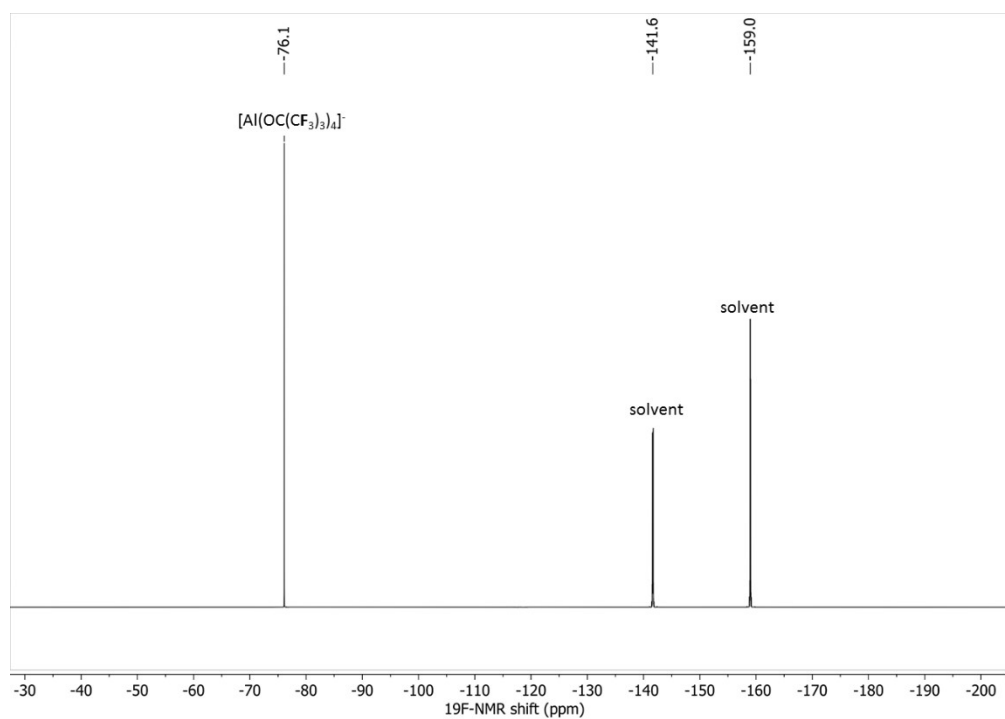

Figure S 3:  $^{19}\text{F}$  NMR spectrum of  $[\mathbf{7a}]^{2+}[\text{Al}(\text{OR}^{\text{F}})_4]^{-}_2$  in 1,2,3,4-Tetrafluorobenzene.

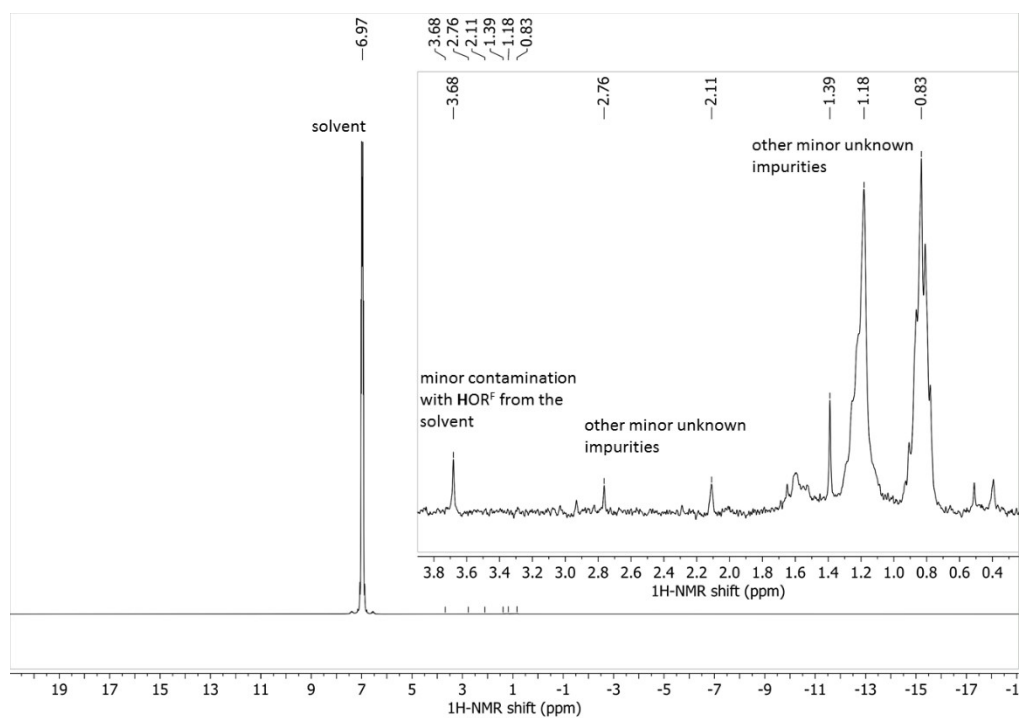

Figure S 4:  $^1\text{H}$  NMR spectrum of  $[\mathbf{7a}]^{2+}[\text{Al}(\text{OR}^{\text{F}})_4]^{-2}$  in 1,2,3,4-Tetrafluorobenzene.

$[\text{Os}_3(\text{CO})_{14}]^{2+}[\text{Al}(\text{OR}^{\text{F}})_4]^{-2}$  in 1,2,3,4-Tetrafluorobenzene

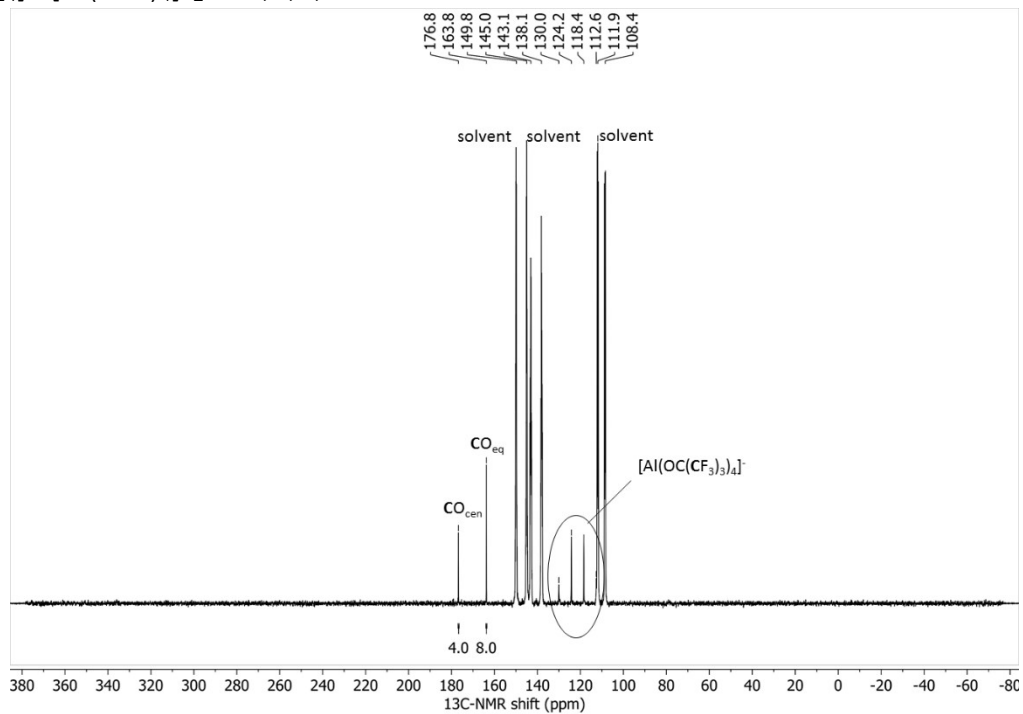

Figure S 5:  $^{13}\text{C}$  NMR spectrum of  $[\mathbf{7b}]^{2+}[\text{Al}(\text{OR}^{\text{F}})_4]^{-2}$  in 1,2,3,4-Tetrafluorobenzene.

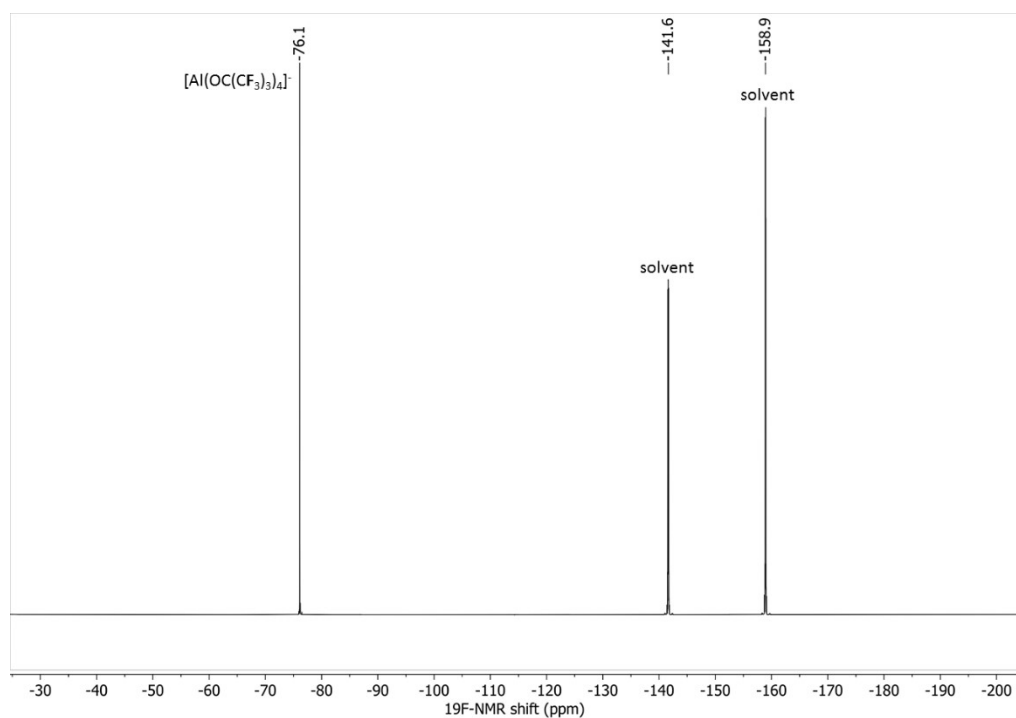

Figure S 6:  $^{19}\text{F}$ -NMR spectrum of  $[\mathbf{7b}]^{2+}[\text{Al}(\text{OR}^{\text{F}})_4]^{-2}$  in 1,2,3,4-Tetrafluorobenzene.

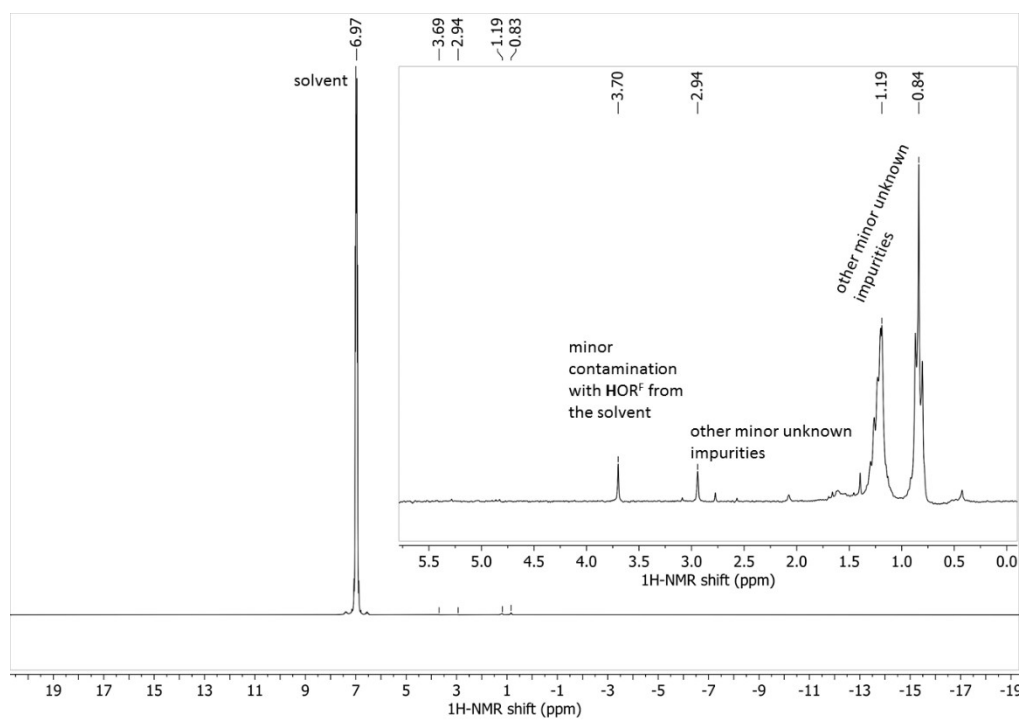

Figure S 7:  $^1\text{H}$ -NMR spectrum of  $[\mathbf{7b}]^{2+}[\text{Al}(\text{OR}^{\text{F}})_4]^{-2}$  in 1,2,3,4-Tetrafluorobenzene.

$[\text{C}_{14}\text{F}_8\text{Cl}_2]^+[\text{F}\{\text{Al}(\text{OR}^{\text{F}})_3\}_2]^-$  in 1,2,3,4-Tetrafluorobenzene

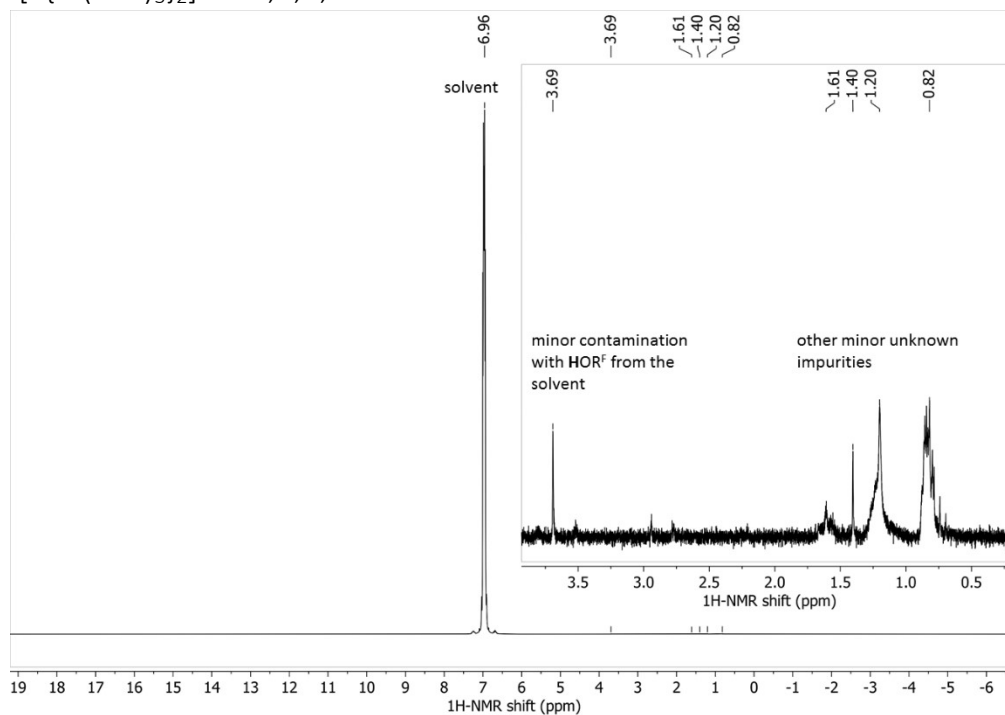

Figure S 8:  $^1\text{H}$  NMR spectrum of  $[\text{6}]^+[\text{F}\{\text{Al}(\text{OR}^{\text{F}})_3\}_2]^-$  in 1,2,3,4-Tetrafluorobenzene.

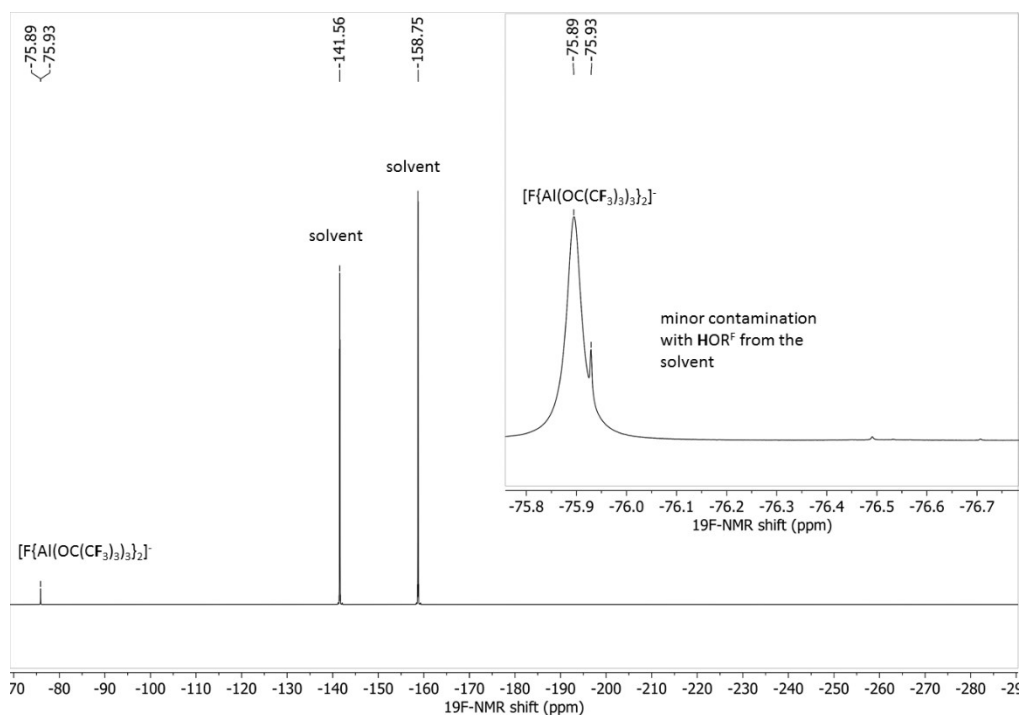

Figure S 9:  $^{19}\text{F}$  NMR spectrum of  $[\text{6}]^+[\text{F}\{\text{Al}(\text{OR}^{\text{F}})_3\}_2]^-$  in 1,2,3,4-Tetrafluorobenzene.

## 6. Vibrational Spectroscopy

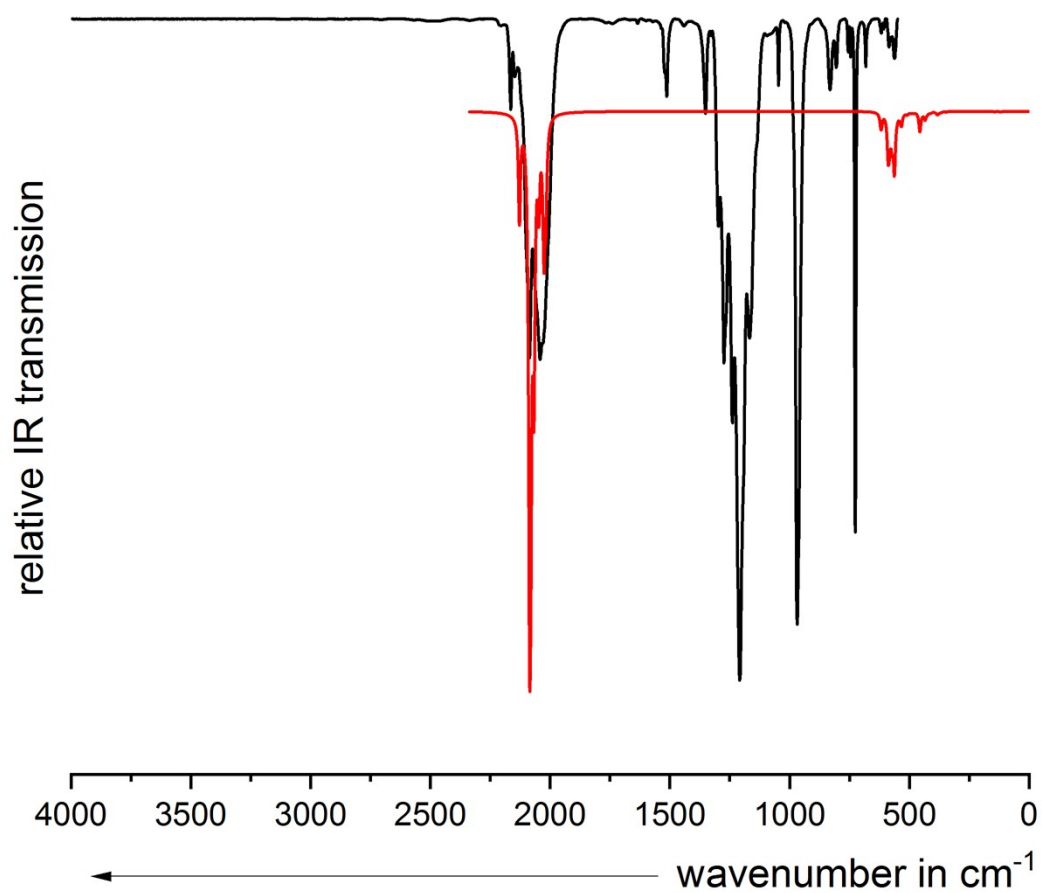

Figure S 10: IR spectrum of the reaction mixture containing [2]<sup>+</sup>[Al(OR<sup>F</sup>)<sub>4</sub>]<sup>-</sup> (**black**) and the calculated IR spectrum of C<sub>2</sub> symmetric [2]<sup>+</sup> at the B3LYP(B3BJ)/def2-TZVPP level of theory (**red**).

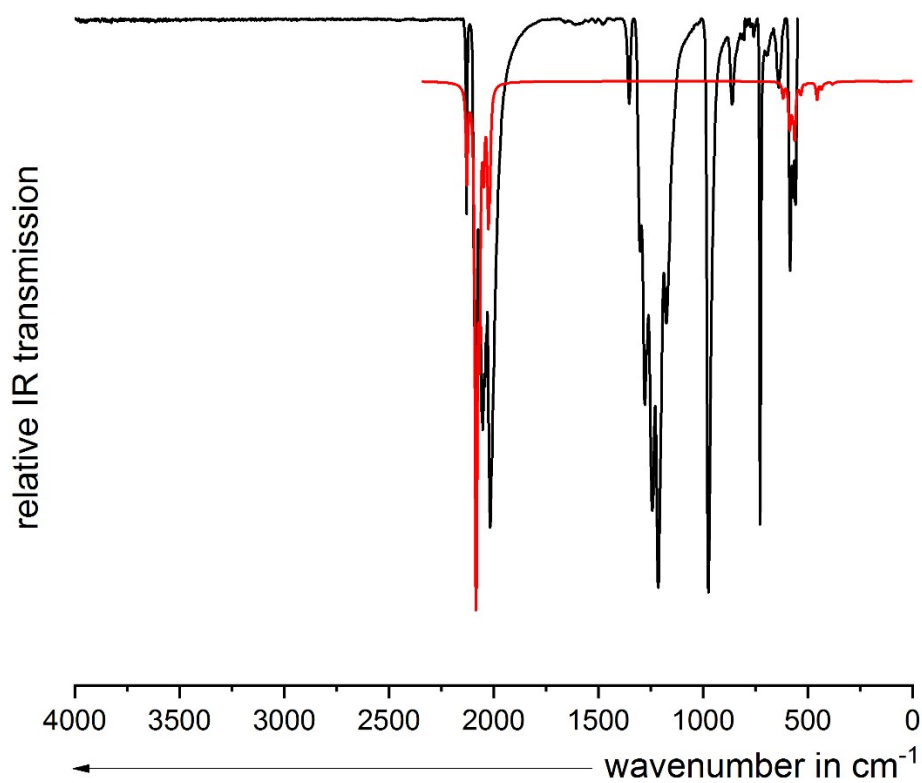

Figure S 11: IR spectrum of a dried 1,2,3,4-Tetrafluorobenzene solution  $[3a]^+[F\{Al(OR^F)_3\}_2]^-$  (**black**) and the calculated IR spectrum of  $C_2$  symmetric  $[3a]^+$  at the B3LYP(B3BJ)/def2-TZVPP level of theory (**red**).

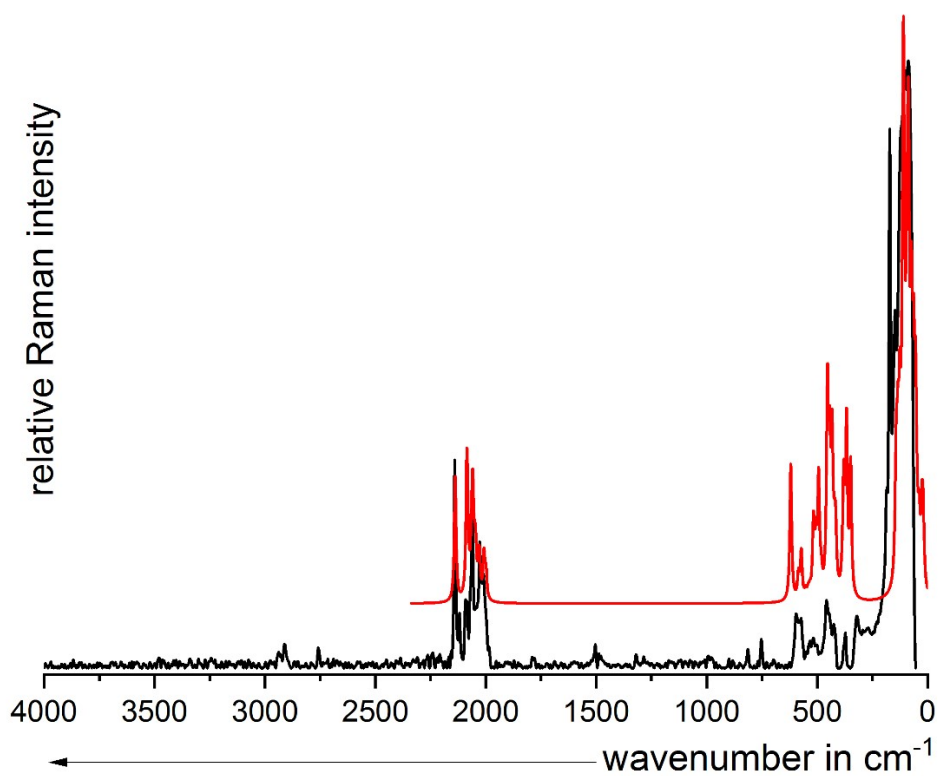

Figure S 12: Raman spectrum of a dried 1,2,3,4-Tetrafluorobenzene solution  $[3a]^+[F\{Al(OR^F)_3\}_2]^-$  (**black**) and the calculated Raman spectrum of  $C_2$  symmetric  $[3a]^+$  at the B3LYP(B3BJ)/def2-TZVPP level of theory (**red**).

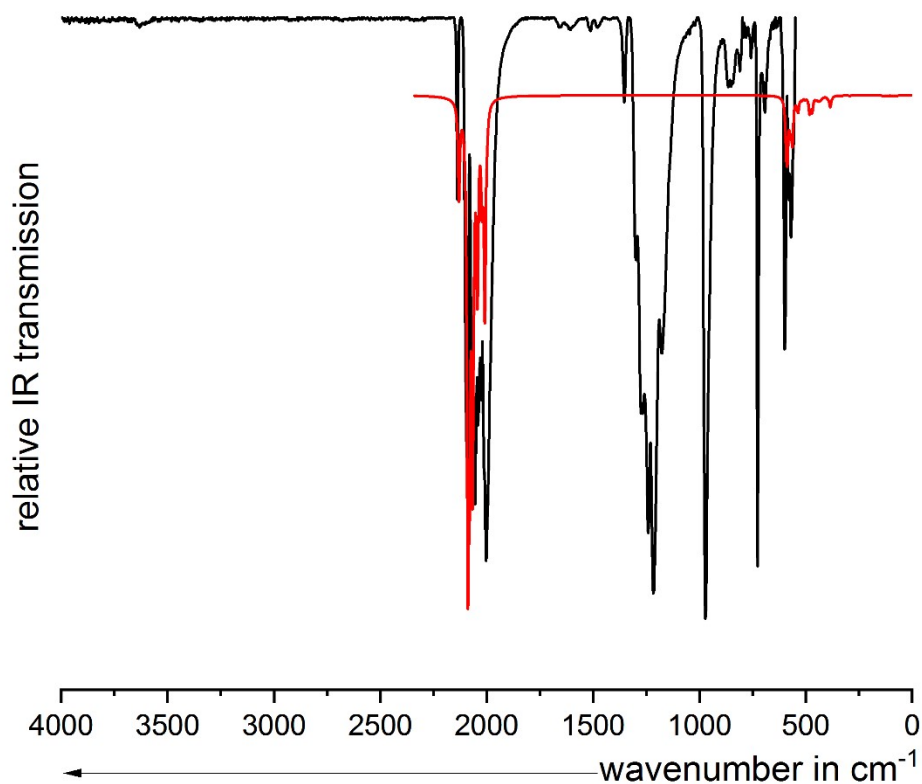

Figure S 13: IR spectrum of a dried 1,2,3,4-Tetrafluorobenzene solution with  $[3b]^+[F\{Al(OR^F)_3\}_2]^-$  (**black**) and the calculated IR spectrum of  $C_1$  symmetric  $[3b]^+$  at the B3LYP(B3BJ)/def2-TZVPP level of theory (**red**).

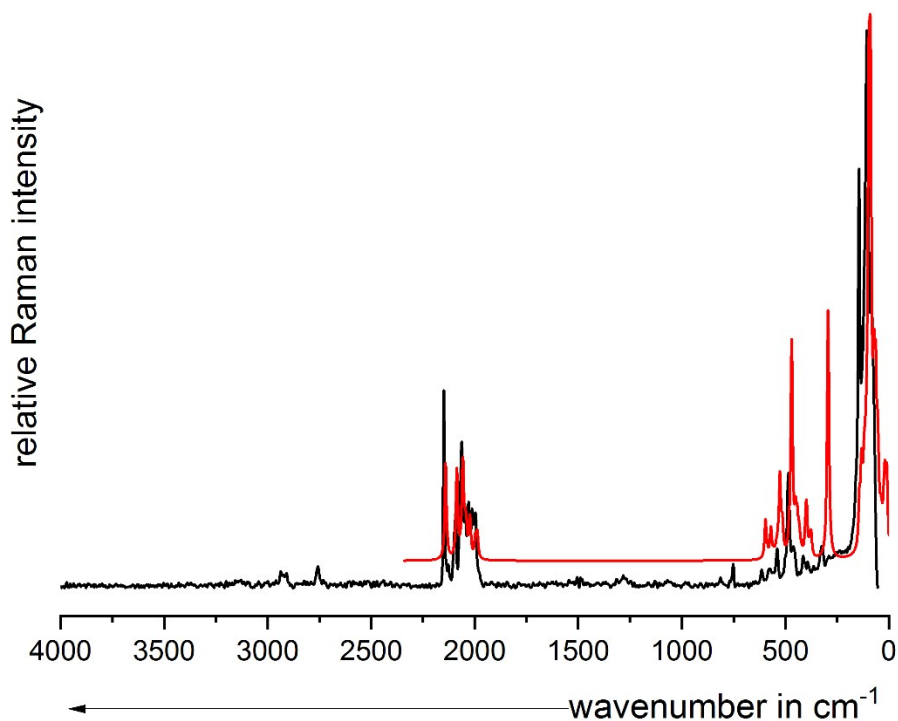

Figure S 14: Raman spectrum of a dried 1,2,3,4-Tetrafluorobenzene solution of  $[3b]^+[F\{Al(OR^F)_3\}_2]^-$  (**black**) and the calculated Raman spectrum of  $C_1$  symmetric  $[3b]^+$  at the B3LYP(B3BJ)/def2-TZVPP level of theory (**red**).



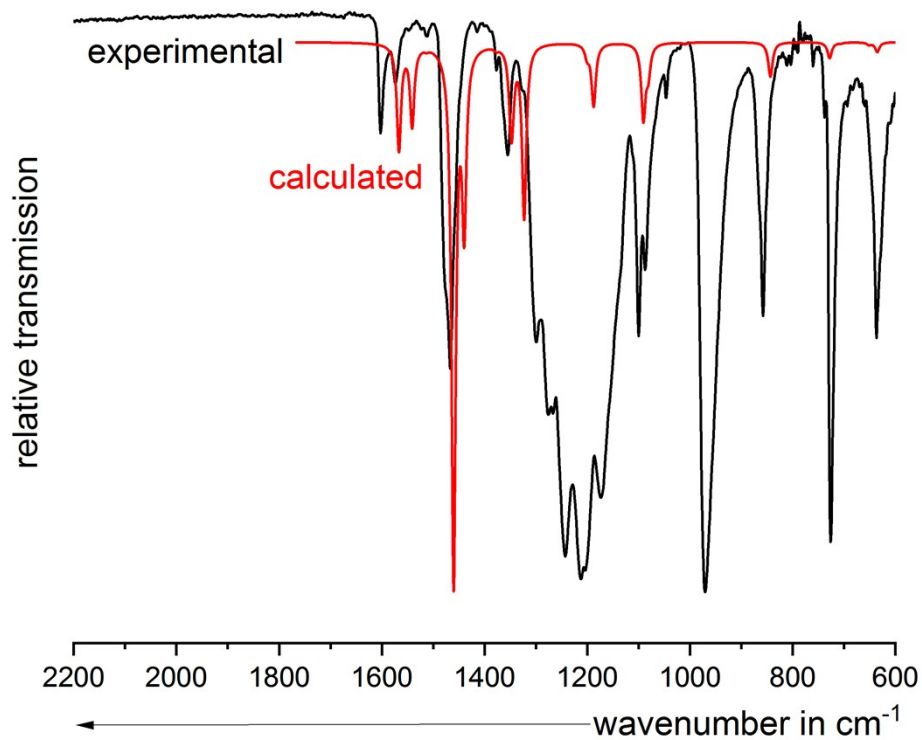

Figure S 15: IR spectrum of crystalline  $[6]^+[F\{Al(OR^F)_3\}_2]^-$  (**black**) and the calculated IR spectrum of  $C_2$  symmetric  $[6]^+$  at the B3LYP(B3BJ)/def2-TZVPP level of theory (**red**).

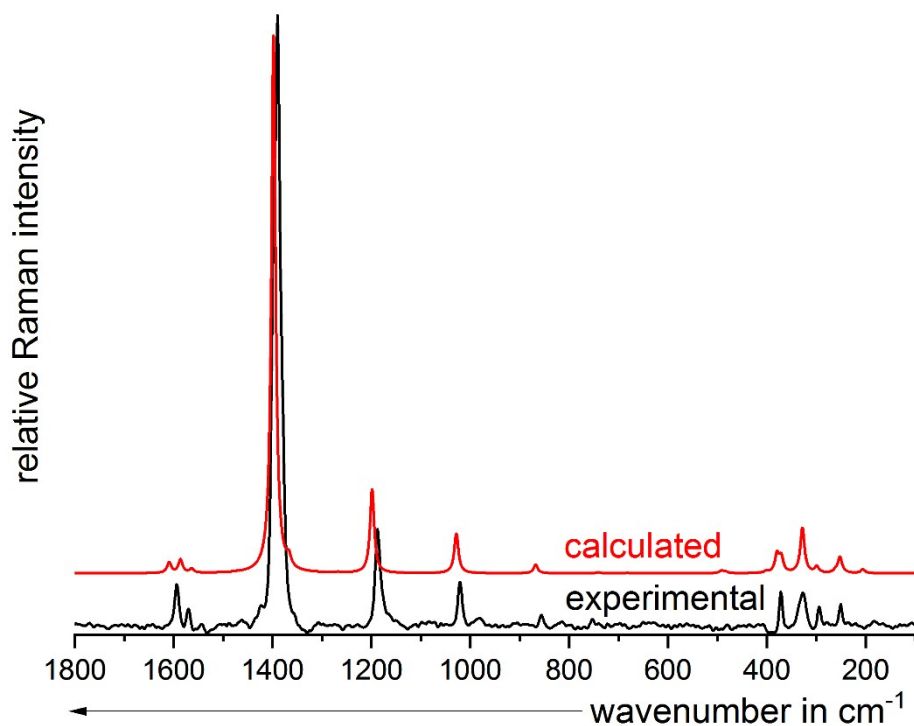

Figure S 16: Raman spectrum of crystalline  $[6]^+[F\{Al(OR^F)_3\}_2]^-$  (**black**) and the calculated Raman spectrum of  $C_2$  symmetric  $[6]^+$  at the B3LYP(B3BJ)/def2-TZVPP level of theory (**red**).

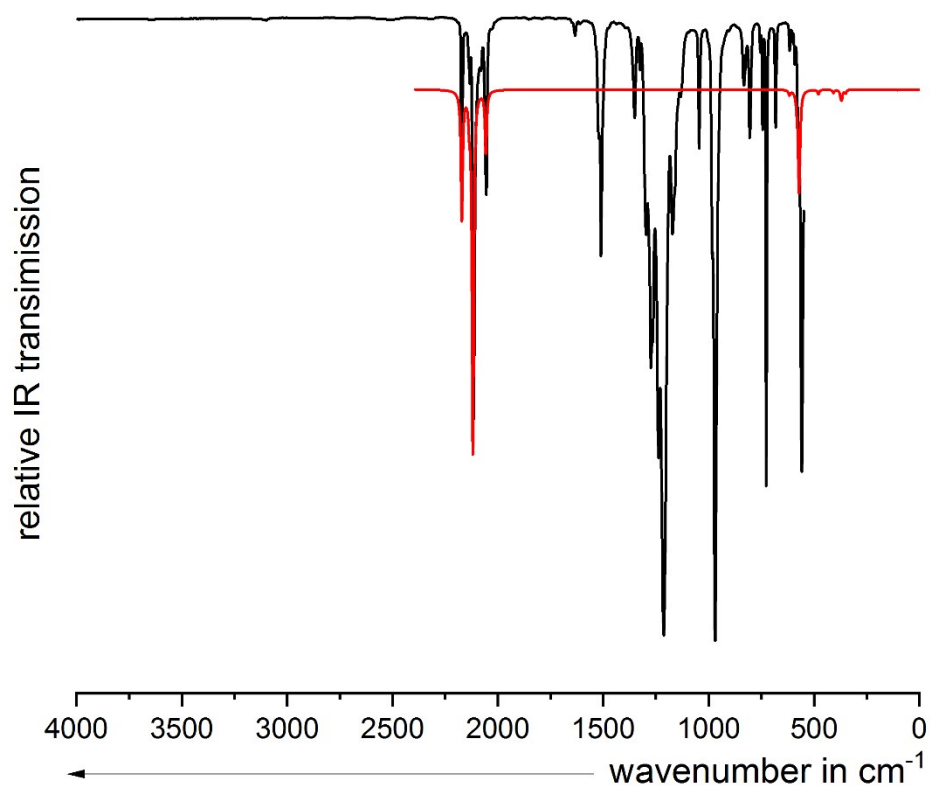

Figure S 17: IR spectrum of crystalline  $[7\mathbf{a}]^{2+}[\text{Al}(\text{OR}^{\text{f}})_4]_2$  (**black**) and the calculated IR spectrum of  $D_{4h}$  symmetric  $[7\mathbf{a}]^{2+}$  at the B3LYP(B3BJ)/def2-TZVPP level of theory (**red**).

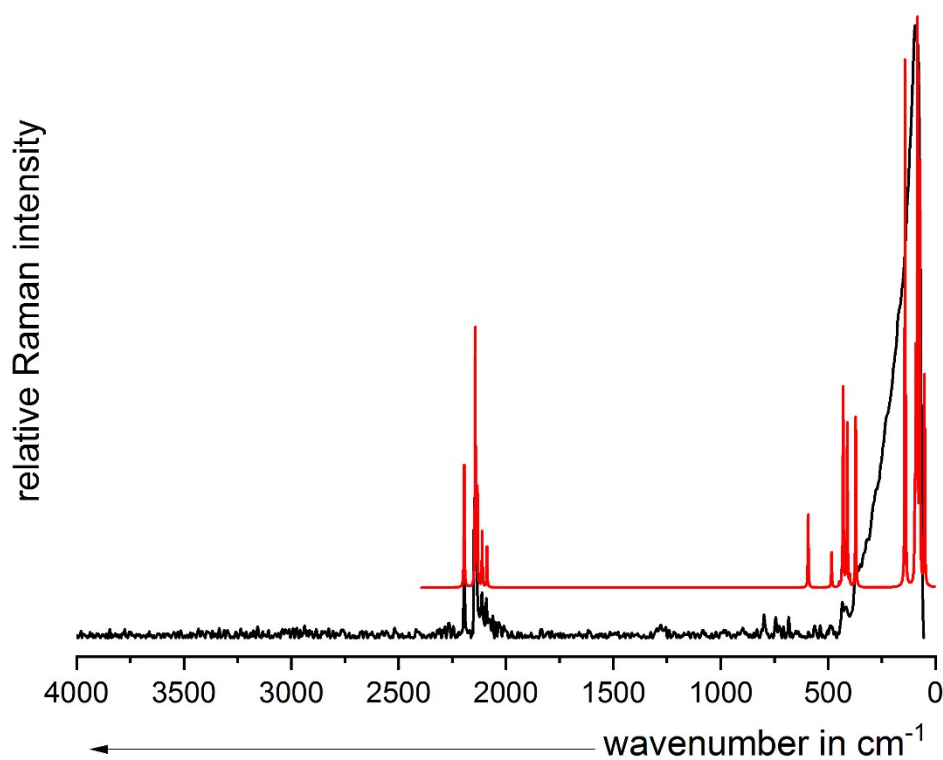

Figure S 18: Raman spectrum of crystalline  $[7\mathbf{a}]^{2+}[\text{Al}(\text{OR}^{\text{f}})_4]_2$  (**black**) and the calculated Raman spectrum of  $D_{4h}$  symmetric  $[7\mathbf{a}]^{2+}$  at the B3LYP(B3BJ)/def2-TZVPP level of theory (**red**).

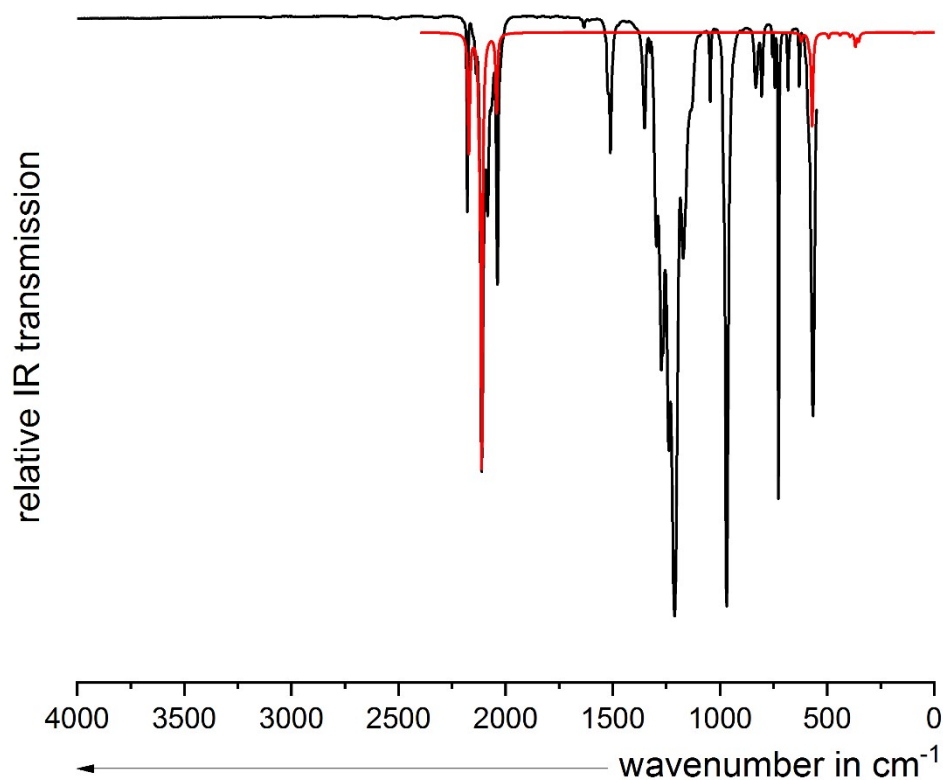

Figure S 19: IR spectrum of a dried 1,2,3,4-Tetrafluorobenzene-solution of  $[7\mathbf{b}]^{2+}[\text{Al}(\text{OR}^{\text{F}})_4]^{-2}$  (**black**) and the calculated IR spectrum of  $D_{4h}$  symmetric  $[7\mathbf{b}]^{2+}$  at the B3LYP(B3BJ)/def2-TZVPP level of theory (**red**).

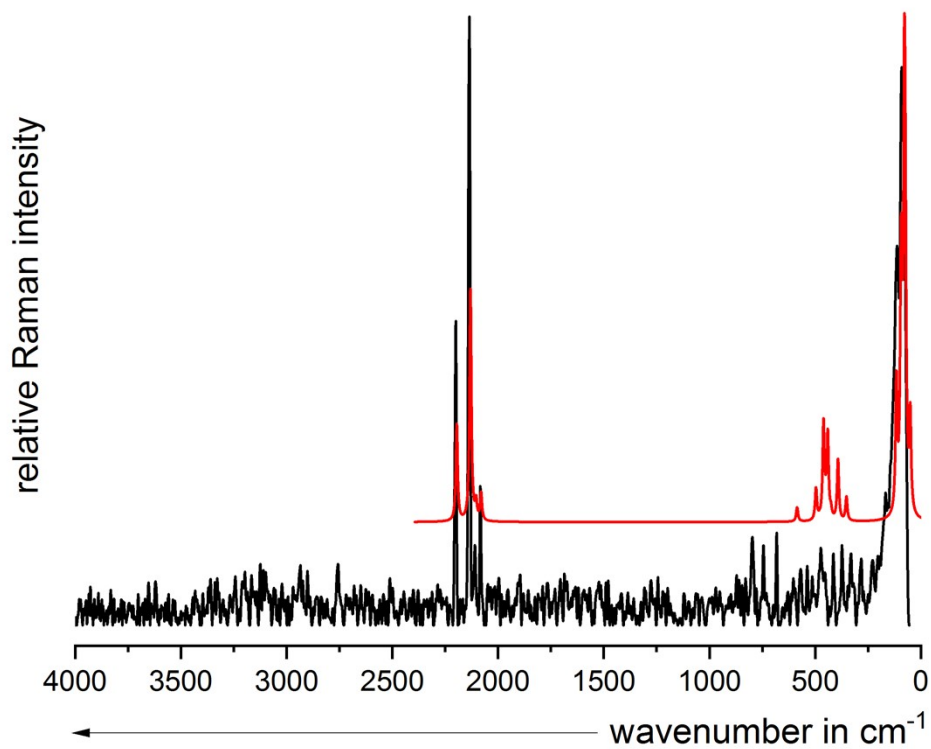

Figure S 20: Raman spectrum of crystalline  $[7\mathbf{b}]^{2+}[\text{Al}(\text{OR}^{\text{F}})_4]^{-2}$  (**black**) and the calculated Raman spectrum of  $D_{4h}$  symmetric  $[7\mathbf{b}]^{2+}$  at the B3LYP(B3BJ)/def2-TZVPP level of theory (**red**).

## 7. Vibrational Modes of the 50 VE Trimetal Tetradecacarbonyls

Table S 3: Comparison of the experimentally obtained data of  $[\text{Ru}_3(\text{CO})_{14}]^{2+}[\text{Al}(\text{OR}^{\text{F}})_4]^{-2}$  with DFT calculated values (B3LYP/def2-TZVPP, scaling factor for vibrational frequencies set to 0.968 according to M. A. Duncan et al.<sup>20</sup>).

|                                                  | exp.<br>Ru(CO) <sub>5</sub> | calcd.<br>Ru(CO) <sub>5</sub> ( <i>D</i> <sub>3h</sub> ) | exp.<br>[Ru <sub>3</sub> (CO) <sub>14</sub> ] <sup>2+</sup><br>[Al(OC(CF <sub>3</sub> ) <sub>3</sub> ) <sub>4</sub> ] <sup>-2</sup> | calcd.<br>[Ru <sub>3</sub> (CO) <sub>14</sub> ] <sup>2+</sup><br>( <i>D</i> <sub>4h</sub> ) | exp.<br>[Ru(CO) <sub>6</sub> ] <sup>2+</sup><br>[SbF <sub>6</sub> ] <sup>-2</sup> | calcd.<br>[Ru(CO) <sub>6</sub> ] <sup>2+</sup><br>( <i>O</i> <sub>h</sub> ) |
|--------------------------------------------------|-----------------------------|----------------------------------------------------------|-------------------------------------------------------------------------------------------------------------------------------------|---------------------------------------------------------------------------------------------|-----------------------------------------------------------------------------------|-----------------------------------------------------------------------------|
| IR $\nu(\text{CO})$ in<br>cm <sup>-1</sup>       | 2002                        | 2005 ( <i>E'</i> )                                       | 2173                                                                                                                                | 2171 ( <i>A</i> <sub>2u</sub> )                                                             | 2198                                                                              | 2206 ( <i>T</i> <sub>1u</sub> )                                             |
|                                                  | 2037                        | 2040 ( <i>A''</i> <sub>2</sub> )                         | 2139                                                                                                                                | 2136 ( <i>A</i> <sub>2u</sub> )                                                             |                                                                                   |                                                                             |
|                                                  |                             |                                                          | 2114                                                                                                                                | 2119 ( <i>E</i> <sub>u</sub> )                                                              |                                                                                   |                                                                             |
|                                                  |                             |                                                          | 2058                                                                                                                                | 2058 ( <i>E</i> <sub>u</sub> )                                                              |                                                                                   |                                                                             |
| Raman<br>$\nu(\text{CO})$ in<br>cm <sup>-1</sup> |                             | 2005 ( <i>E'</i> )                                       | 2194                                                                                                                                | 2195 ( <i>A</i> <sub>1g</sub> )                                                             | 2252                                                                              | 2260 ( <i>E</i> <sub>g</sub> )                                              |
|                                                  |                             | 2030 ( <i>A'</i> <sub>1</sub> )                          | 2146                                                                                                                                | 2143 ( <i>A</i> <sub>1g</sub> )                                                             | 2219                                                                              | 2223 ( <i>A</i> <sub>1g</sub> )                                             |
|                                                  |                             | 2118( <i>A'</i> <sub>1</sub> )                           | 2138                                                                                                                                | 2133 ( <i>B</i> <sub>2g</sub> )                                                             |                                                                                   |                                                                             |
|                                                  |                             |                                                          | 2113                                                                                                                                | 2111 ( <i>E</i> <sub>g</sub> & <i>A</i> <sub>1g</sub> )                                     |                                                                                   |                                                                             |
|                                                  |                             |                                                          | 2092                                                                                                                                | 2089 ( <i>B</i> <sub>1g</sub> )                                                             |                                                                                   |                                                                             |
| $d(\text{M-CO})_{\text{ax}}$<br>in Å             |                             | 1.955                                                    | 1.999(1)                                                                                                                            | 1.985                                                                                       | 2.024                                                                             | 2.037                                                                       |
| avg. $d(\text{M-CO})_{\text{eq-ter}}$ in<br>Å    |                             | 1.958                                                    | 1.981                                                                                                                               | 1.984                                                                                       |                                                                                   |                                                                             |
| avg. $d(\text{M-CO})_{\text{eq-cen}}$ in<br>Å    |                             |                                                          | 1.964                                                                                                                               | 1.960                                                                                       |                                                                                   |                                                                             |
| $d(\text{M-M})$ in Å                             |                             |                                                          | 2.896                                                                                                                               | 2.970                                                                                       |                                                                                   |                                                                             |
| <sup>13</sup> C-shift in<br>ppm                  | 200.4                       |                                                          | 195.1                                                                                                                               |                                                                                             |                                                                                   |                                                                             |
|                                                  |                             |                                                          | 185.0                                                                                                                               |                                                                                             |                                                                                   |                                                                             |
|                                                  |                             |                                                          | 171.5                                                                                                                               |                                                                                             | 168.8                                                                             |                                                                             |

Table S 4: Comparison of the experimentally obtained data of  $[\text{Os}_3(\text{CO})_{14}]^{2+}[\text{Al}(\text{OR}^{\text{F}})_4]^{-2}$  with DFT calculated values (B3LYP/def2-TZVPP, scaling factor for vibrational frequencies set to 0.968 according to M. A. Duncan et al.<sup>20</sup>).

|                                          | exp.<br>$\text{Os}(\text{CO})_5$ | calcd.<br>$\text{Os}(\text{CO})_5$<br>( $D_{3h}$ ) | $[\text{Os}_3(\text{CO})_{14}]^{2+}$<br>$[\text{Al}(\text{OC}(\text{CF}_3)_3)_4]^{-2}$ | calcd.<br>$[\text{Os}_3(\text{CO})_{14}]^{2+}$ | exp.<br>$[\text{Os}(\text{CO})_6]^{2+}$<br>$[\text{SbF}_6]^{-2}$ | calcd.<br>$[\text{Os}(\text{CO})_6]^{2+}$<br>( $O_h$ ) |      |                   |
|------------------------------------------|----------------------------------|----------------------------------------------------|----------------------------------------------------------------------------------------|------------------------------------------------|------------------------------------------------------------------|--------------------------------------------------------|------|-------------------|
| IR $\nu(\text{CO})$                      | 1993                             | 1993 ( $E'$ )                                      | 2179                                                                                   | 2172 ( $A_{2u}$ )                              | 2189                                                             | 2195 ( $T_{1u}$ )                                      |      |                   |
|                                          | 2035                             | 2035 ( $A''_2$ )                                   | 2127                                                                                   | 2124 ( $A_{2u}$ )                              |                                                                  |                                                        |      |                   |
|                                          |                                  |                                                    | 2109                                                                                   | 2112 ( $E_u$ )                                 |                                                                  |                                                        |      |                   |
|                                          |                                  |                                                    | 2042                                                                                   | 2043 ( $E_u$ )                                 |                                                                  |                                                        |      |                   |
| Raman<br>$\nu(\text{CO})$                |                                  | 1993 ( $E'$ )                                      | 2200                                                                                   | 2195 ( $A_{1g}$ )                              | 2258                                                             | 2260 ( $E_g$ )                                         |      |                   |
|                                          |                                  | 2023 ( $A'_1$ )                                    | 2136                                                                                   | 2130 ( $A_{1g}$ & $B_{2g}$ )                   |                                                                  |                                                        | 2214 | 2215 ( $A_{1g}$ ) |
|                                          |                                  | 2117 ( $A'_1$ )                                    | 2109                                                                                   | 2104 ( $E_g$ & $A_{1g}$ )                      |                                                                  |                                                        |      |                   |
|                                          |                                  |                                                    | 2084                                                                                   | 2081 ( $B_{1g}$ )                              |                                                                  |                                                        |      |                   |
| $d(\text{M-CO})_{ax}$<br>in Å            |                                  | 1.977                                              | 1.983(4)                                                                               | 1.985                                          | 2.022                                                            | 2.049                                                  |      |                   |
| avg. $d(\text{M-CO})_{eq-ter}$ . in<br>Å |                                  | 1.964                                              | 1.983                                                                                  | 2.000                                          |                                                                  |                                                        |      |                   |
| avg. $d(\text{M-CO})_{eq-cen}$ . in<br>Å |                                  |                                                    | 1.964                                                                                  | 1.975                                          |                                                                  |                                                        |      |                   |
| $d(\text{M-M})$ in Å                     |                                  |                                                    | 2.913                                                                                  | 3.002                                          |                                                                  |                                                        |      |                   |
| $^{13}\text{C}$ -shift in<br>ppm         | 182.6                            |                                                    | 176.8                                                                                  |                                                |                                                                  |                                                        |      |                   |
|                                          |                                  |                                                    | 163.8                                                                                  |                                                |                                                                  |                                                        |      |                   |
|                                          |                                  |                                                    | not observed                                                                           |                                                | 150.6                                                            |                                                        |      |                   |

## 8. Determination of the force constants

For the determination of the force constants the Cotton-Kraihanzel-approximation is used:<sup>21</sup>

The central  $-\text{M}(\text{CO})_4-$  fragment of  $[\text{M}_3(\text{CO})_{14}]^{2+}$  is approximated as *trans*- $\text{M}(\text{CO})_4\text{L}_2$ . The force constant  $k_{\text{cen,eq}}$  can be easily determined with the mode 10 (see manuscript):

$$k_{\text{cen,eq}} = \frac{\lambda}{\mu}$$

The both  $-\text{M}(\text{CO})_5$  fragments are approximated as  $\text{M}(\text{CO})_5\text{L}$  fragments. This interaction is here approximated as zero due to the long distance between the two terminal fragments ( $>5 \text{ \AA}$ ). The mode 6 gives the force constant  $k_{\text{out,eq}}$ :

$$k_{\text{out,eq}} = \frac{\lambda}{\mu}$$

Because the interaction between the carbonyl-ligands in the  $-\text{M}(\text{CO})_5$  fragments ( $k_{\text{out-out}}$ ) is needed for the calculation of  $k_{\text{out,ax}}$ , this is calculated before:

$$k_{\text{out,eq} - \text{out,eq}} = -\frac{\left(\frac{\lambda}{\mu} - k_{\text{out,eq}}\right)}{2}$$

This gives finally  $k_{\text{out,ax}}$ :

$$k_{\text{out,ax}} = \mu^{-1} \left( \lambda + \frac{4\mu^2 k_{\text{out,eq} - \text{out,eq}}^2}{\mu k_{\text{out,eq}} + 4\mu k_{\text{out,eq} - \text{out,eq}} - \lambda} \right)$$

## 9. pXRD

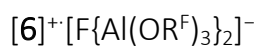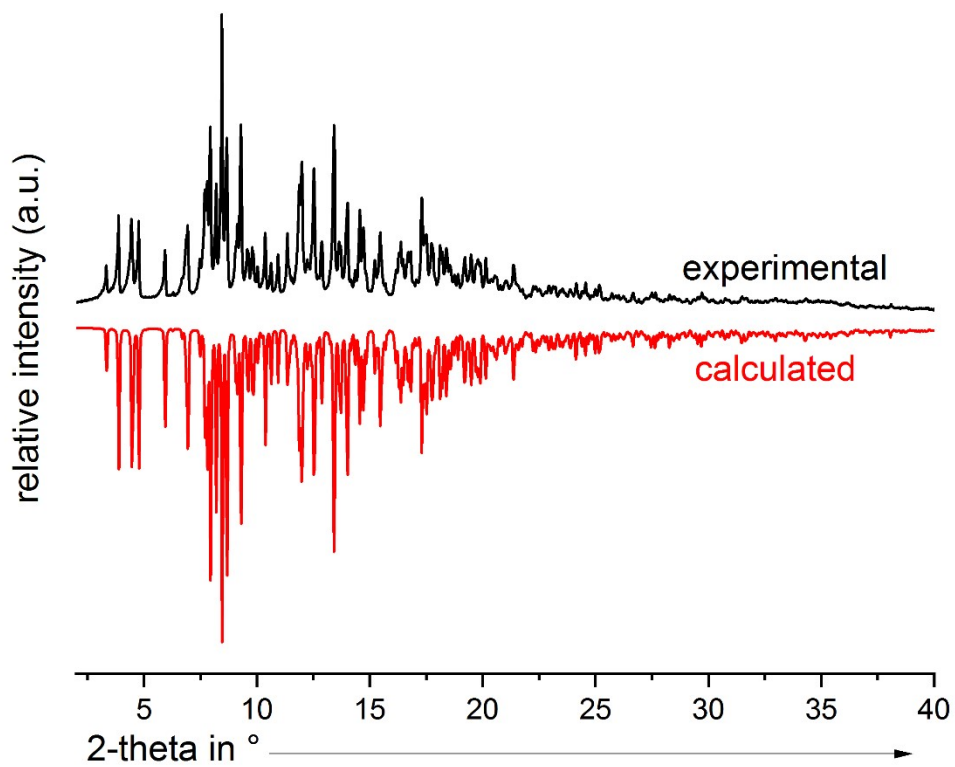

Figure S 21: Measured pXRD data of the bulk material of [anthracene<sup>Hal</sup>]<sup>+</sup>[Al(OR<sup>F</sup>)<sub>4</sub>]<sup>-</sup> at 100 K (**black**) and the calculated powder diffraction pattern, simulated with the respective single crystal data (**red**).

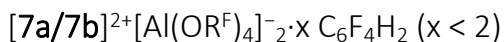

The pXRD shows, that the  $[7a]^{2+}[Al(OR^F)_4]^{-2} \cdot 2 C_6F_4H_2$  is not phase-pure. Because the same material was used for the NMR-spectroscopy, which showed no significant impurities, we expected, that the phase decomposes under vacuum, because the co-crystallized 1,2,3,4-Tetrafluorobenzene (bp. = 95 °C) evaporates. When the experiment is repeated with a longer vacuum exposure, the crystalline phase is even more decomposed, which validates the theory. The effect is even more pronounced at  $[7b]^{2+}[Al(OR^F)_4]^{-2} \cdot 2 C_6F_4H_2$ .

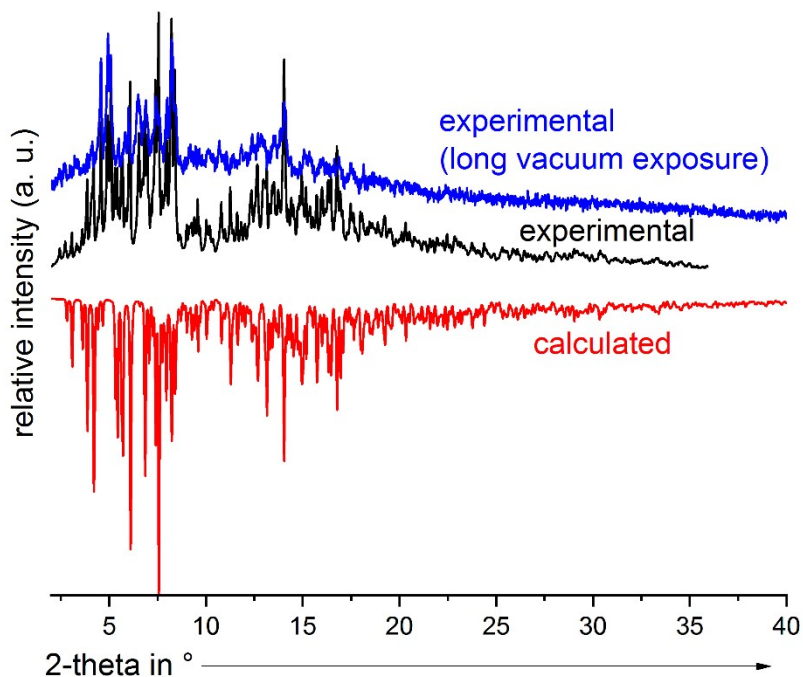

Figure S 22: Measured pXRD data of the bulk material of  $[Ru_3(CO)_{14}]^{2+}[Al(OR^F)_4]^{-2} \cdot 2 C_6F_4H_2$  at 100 K with a short drying period (**black**) + a long drying period in the high-vacuum (**blue**) and the calculated powder diffraction pattern, simulated with the respective single crystal data (**red**).

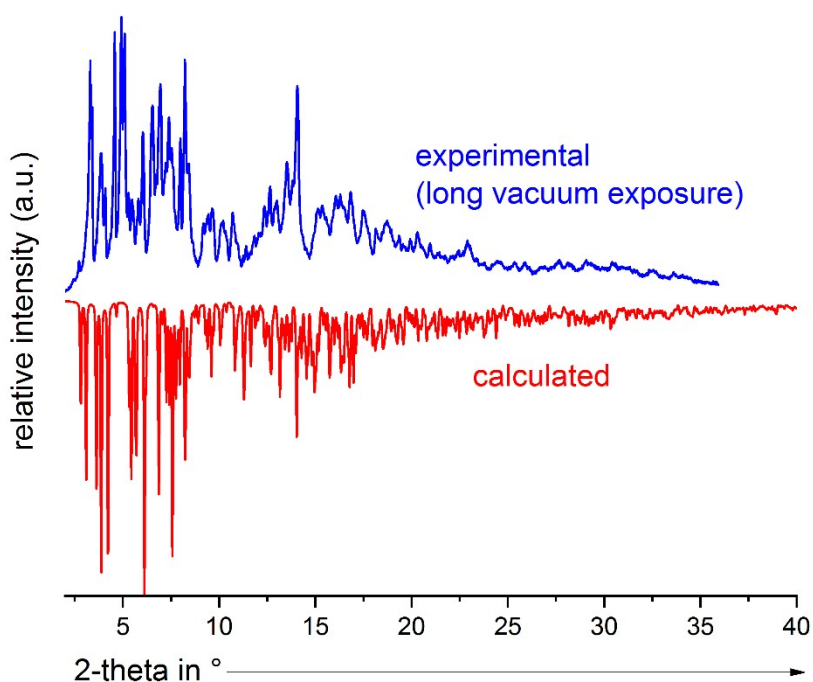

Figure S 23: Measured pXRD data of the bulk material of  $[Os_3(CO)_{14}]^{2+}[Al(OR^F)_4]^{-2} \cdot 2 C_6F_4H_2$  at 100 K with a long drying period in the high-vacuum (**blue**) and the calculated powder diffraction pattern, simulated with the respective single crystal data (**red**).



## 10. EPR-Spectroscopy

The isotropic hyperfine coupling constants obtained from DFT calculations at the B3LYP/EPR-II level of theory are shown in Figure S 24. For the simulation of the continuous wave EPR spectrum shown in the main text using EasySpin functions in MATLAB, the computed hyperfine coupling constants of the eight fluorine atoms were divided into two groups, each consisting of four fluorine atoms. The DFT values were used as the starting values for the fit of the experimental spectrum: Initially, the hyperfine coupling constants were assumed to be 6 MHz for the fluorine atoms in  $\beta$ -position and 21 MHz for the fluorine atoms in  $\alpha$ -position and an isotropic hyperfine coupling constant of 5 MHz was assumed for each of the two chlorine atoms. During the fitting procedure of the experimental cw EPR spectrum, the hyperfine coupling constants were only adjusted by applying an identical scaling factor to all values computed by DFT. The best fit was obtained for hyperfine coupling constants of 5.82 MHz and 20.37 MHz for the two groups of fluorine atoms and 4.85 MHz for the two chlorine atoms (scaling factor of 0.97). The excellent agreement with the experimental data confirms the assignment of the hyperfine couplings and the accuracy of the calculated spin density.

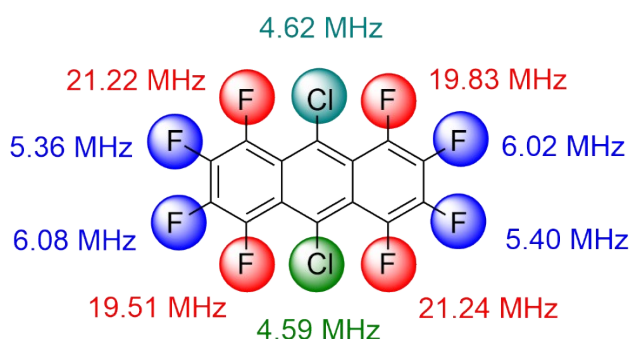

Figure S 24: Assignment of the hyperfine coupling constants using DFT at the B3LYP/EPR-II (6-31G\*\* for Cl) level of theory.

## 11. Cyclic Voltammetry

Cyclic voltammetry was performed in a setup with a platinum working electrode, platinum mesh counter electrode and a platinum quasi-reference electrode. The measurements were done with a 10 mM solution of **6** in 1,2-Difluorobenzene and 1,2,3,4-Tetrafluorobenzene.  $[\text{NBu}_4]^+[\text{Al}(\text{OR}^{\text{F}})_4]^-$  was used as conducting salt in 100 mM solution and  $[\text{Fc}]^+[\text{Al}(\text{OR}^{\text{F}})_4]^-$  (10 mM) + Fc (10 mM) as internal reference. The half-wave potential is almost independent from the scan rate  $\nu$  (Table S 1 + Table S 2). The redox reaction is electrochemically reversible under the given conditions, because the anodic peak current is  $i_{\text{ac}}$  is proportional to the square-root of the scan rate  $\nu^{1/2}$  (Figure S 11 + Figure S 12).

Table S 6: Half-wave potentials of **6** in 1,2-Difluorobenzene vs.  $\text{Fc}^{0/+}$  and anodic peak currents at different scan rates.

| $\nu$ in $\text{mV s}^{-1}$ | $E_{1/2}$ in V | $i_{\text{ac}}$ in $\mu\text{A}$ |
|-----------------------------|----------------|----------------------------------|
| 20                          | 1.419          | 10.78                            |
| 50                          | 1.419          | 15.47                            |
| 100                         | 1.417          | 20.39                            |

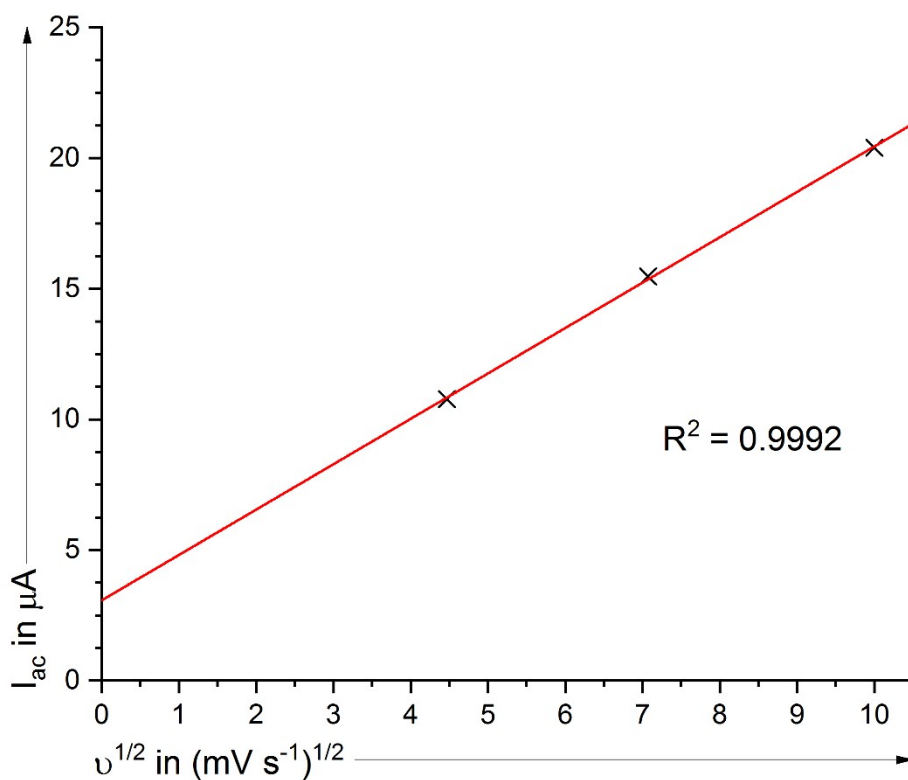

Figure S 25: Linear fit of the anodic peak current  $i_{\text{ac}}$  against the square root of the scan rate  $\nu^{1/2}$  of **6** in 1,2-Difluorobenzene.

Table S 7: Half-wave potentials of **6** vs.  $\text{Fc}^{0/+}$  in 1,2,3,4-Tetrafluorobenzene and anodic peak currents at different scan rates.

| $\nu$ in $\text{mV s}^{-1}$ | $E_{1/2}$ in V | $I_{ac}$ in $\mu\text{A}$ |
|-----------------------------|----------------|---------------------------|
| 20                          | 1.419          | 6.201                     |
| 50                          | 1.417          | 9.349                     |
| 100                         | 1.419          | 12.62                     |
| 200                         | 1.419          | 17.04                     |
| 500                         | 1.422          | 25.53                     |
| 1000                        | 1.425          | 34.39                     |

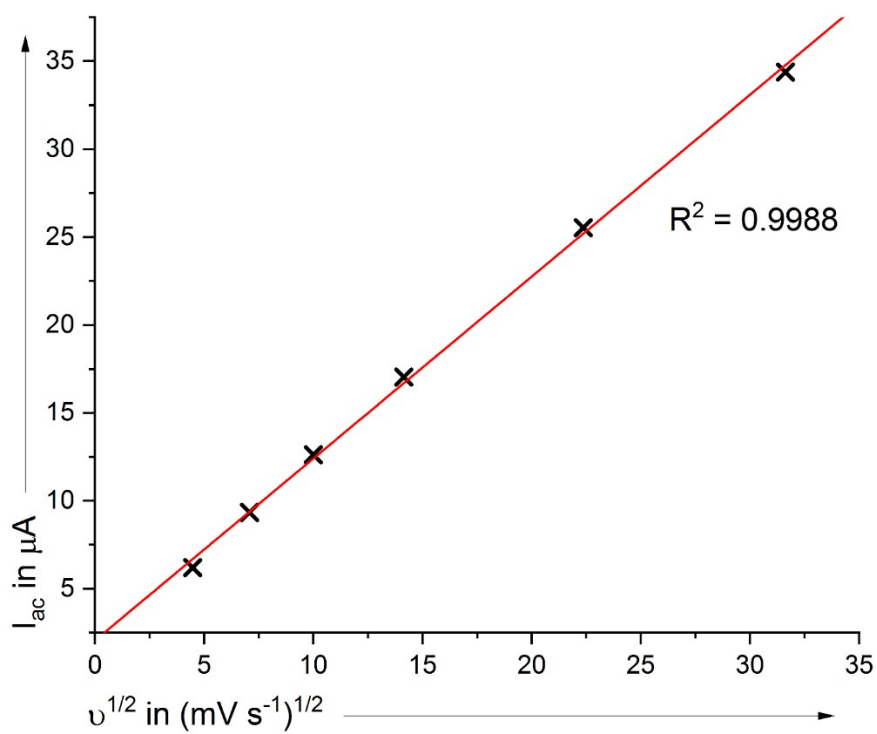

Figure S 26: Linear fit of the anodic peak current  $I_{ac}$  against the square root of the scan rate  $\nu^{1/2}$  of **6** in 1,2,3,4-Tetrafluorobenzene.

## 12. EDA-NOCV

Table S 8: EDA-NOCV results of the  $[\text{Ag}\{\text{M}_3(\text{CO})_{12}\}_2]^+$  ( $\text{M} = \text{Ru}, \text{Os}$ ) complexes using the fragments  $\text{Ag}^+$  and  $\{\text{M}_3(\text{CO})_{12}\}_2$  at the BP86-D3(BJ)/TZ2P level. Values are given in kcal/mol.

| Energies                             | Orbital interaction                                                                                  | $\text{Ag}^+ + \{\text{Ru}_3(\text{CO})_{12}\}_2$ | $\text{Ag}^+ + \{\text{Os}_3(\text{CO})_{12}\}_2$ |
|--------------------------------------|------------------------------------------------------------------------------------------------------|---------------------------------------------------|---------------------------------------------------|
| $\Delta E_{\text{int}}$              |                                                                                                      | -118.45                                           | -123.68                                           |
| $\Delta E_{\text{Pauli}}$            |                                                                                                      | 130.54                                            | 131.94                                            |
| $\Delta E_{\text{disp}}$             |                                                                                                      | -7.89                                             | -11.13                                            |
| $\Delta E_{\text{elstat}}$           |                                                                                                      | -123.80                                           | -124.68                                           |
| $\Delta E_{\text{orb}}$              |                                                                                                      | -117.30                                           | -119.87                                           |
| $\Delta E_{\text{orb}(1)}$           | $[\text{TMC}] \rightarrow \text{Ag}^+ (s) \leftarrow [\text{TMC}] \sigma\text{-donation}$            | -45.17                                            | -44.98                                            |
| $\Delta E_{\text{orb}(2)}$           | $[\text{TMC}] \rightarrow \text{Ag}^+ (p_\sigma) \leftarrow [\text{TMC}] \sigma\text{-donation}$     | -15.02                                            | -16.07                                            |
| $\Delta E_{\text{orb}(3)}$           | $[\text{TMC}] \rightarrow \text{Ag}^+ (p_\pi) \leftarrow [\text{TMC}] \pi\text{-donation}$           | -10.68                                            | -10.99                                            |
| $\Delta E_{\text{orb}(4)}$           | $[\text{TMC}] \rightarrow \text{Ag}^+ (p_\pi) \leftarrow [\text{TMC}] \pi\text{-donation}$           | -7.35                                             | -7.88                                             |
| $\Delta E_{\text{orb}(5)}$           | $[\text{TMC}] \leftarrow \text{Ag}^+ (p_\sigma) \rightarrow [\text{TMC}] \sigma\text{-backdonation}$ | -5.28                                             | -5.94                                             |
| $\Delta E_{\text{orb}(6)}$           |                                                                                                      | -3.95                                             | -4.80                                             |
| $\Delta E_{\text{orb}(7)}$           |                                                                                                      | -4.37                                             | -3.75                                             |
| $\Delta E_{\text{orb}(8)}$           |                                                                                                      | -3.31                                             | -3.57                                             |
| $\Delta E_{\text{orb}(9)}$           |                                                                                                      | -2.35                                             | -2.36                                             |
| $\Delta E_{\text{orb}(\text{rest})}$ |                                                                                                      | -19.80                                            | -19.51                                            |

Table S 9: EDA-NOCV results of the  $[\text{M}_3(\text{CO})_{14}]^{2+}$  ( $\text{M} = \text{Ru}, \text{Os}$ ) complexes using the fragments  $[\text{Ru}(\text{CO})_4]^{2+}$  and  $\{[\text{Ru}(\text{CO})_5]_2\}^{2+}$  at the BP86-D3(BJ)/TZ2P level. Values are given in kcal/mol.

| Energies                             | Orbital interaction                | $[\text{Ru}(\text{CO})_4]^{2+} + \{[\text{Ru}(\text{CO})_5]_2\}^{2+}$ |        | $[\text{Os}(\text{CO})_4]^{2+} + \{[\text{Os}(\text{CO})_5]_2\}^{2+}$ |        |
|--------------------------------------|------------------------------------|-----------------------------------------------------------------------|--------|-----------------------------------------------------------------------|--------|
| $\Delta E_{\text{int}}$              |                                    | -124.91                                                               |        | -138.02                                                               |        |
| $\Delta E_{\text{Pauli}}$            |                                    | 136.87                                                                |        | 140.72                                                                |        |
| $\Delta E_{\text{disp}}$             |                                    | -33.70                                                                |        | -34.41                                                                |        |
| $\Delta E_{\text{elstat}}$           |                                    | -106.54                                                               |        | -114.38                                                               |        |
| $\Delta E_{\text{orb}}$              |                                    | -124.91                                                               |        | -129.96                                                               |        |
| $\Delta E_{\text{orb}(1)}$           | covalent metal-metal bonding       | -35.37                                                                | -19.67 | -40.73                                                                | -21.86 |
| $\Delta E_{\text{orb}(2)}$           | donation of neighbouring carbonyls | -10.58                                                                | -44.53 | -11.91                                                                | -44.17 |
| $\Delta E_{\text{orb}(\text{rest})}$ |                                    | -5.84                                                                 | -5.60  | -5.75                                                                 | -5.58  |

## 13. QTAIM Results

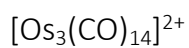

Normalization factor of the integral of electron density is 0.999842

The atomic charges after normalization and atomic volumes:

|         |         |           |         |                           |
|---------|---------|-----------|---------|---------------------------|
| 1 (Os)  | Charge: | 0.989859  | Volume: | 106.723 Bohr <sup>3</sup> |
| 2 (Os)  | Charge: | 0.667593  | Volume: | 110.746 Bohr <sup>3</sup> |
| 3 (O)   | Charge: | -1.082865 | Volume: | 127.505 Bohr <sup>3</sup> |
| 4 (O)   | Charge: | -1.099051 | Volume: | 128.098 Bohr <sup>3</sup> |
| 5 (O)   | Charge: | -1.085804 | Volume: | 129.370 Bohr <sup>3</sup> |
| 6 (O)   | Charge: | -1.089490 | Volume: | 128.851 Bohr <sup>3</sup> |
| 7 (O)   | Charge: | -1.099167 | Volume: | 127.871 Bohr <sup>3</sup> |
| 8 (O)   | Charge: | -1.118869 | Volume: | 132.023 Bohr <sup>3</sup> |
| 9 (O)   | Charge: | -1.119974 | Volume: | 131.323 Bohr <sup>3</sup> |
| 10 (C)  | Charge: | 1.112415  | Volume: | 70.825 Bohr <sup>3</sup>  |
| 11 (C)  | Charge: | 1.075248  | Volume: | 65.996 Bohr <sup>3</sup>  |
| 12 (C)  | Charge: | 1.061842  | Volume: | 67.067 Bohr <sup>3</sup>  |
| 13 (C)  | Charge: | 1.063778  | Volume: | 65.419 Bohr <sup>3</sup>  |
| 14 (C)  | Charge: | 1.068485  | Volume: | 64.479 Bohr <sup>3</sup>  |
| 15 (C)  | Charge: | 0.997766  | Volume: | 63.299 Bohr <sup>3</sup>  |
| 16 (C)  | Charge: | 0.992029  | Volume: | 62.271 Bohr <sup>3</sup>  |
| 17 (Os) | Charge: | 0.989859  | Volume: | 106.723 Bohr <sup>3</sup> |
| 18 (O)  | Charge: | -1.082877 | Volume: | 127.505 Bohr <sup>3</sup> |
| 19 (O)  | Charge: | -1.099050 | Volume: | 128.098 Bohr <sup>3</sup> |
| 20 (O)  | Charge: | -1.085804 | Volume: | 129.370 Bohr <sup>3</sup> |
| 21 (O)  | Charge: | -1.089489 | Volume: | 128.851 Bohr <sup>3</sup> |
| 22 (O)  | Charge: | -1.099166 | Volume: | 127.871 Bohr <sup>3</sup> |
| 23 (O)  | Charge: | -1.118865 | Volume: | 132.023 Bohr <sup>3</sup> |
| 24 (O)  | Charge: | -1.119975 | Volume: | 131.323 Bohr <sup>3</sup> |
| 25 (C)  | Charge: | 1.112425  | Volume: | 70.825 Bohr <sup>3</sup>  |
| 26 (C)  | Charge: | 1.075248  | Volume: | 65.996 Bohr <sup>3</sup>  |
| 27 (C)  | Charge: | 1.061842  | Volume: | 67.067 Bohr <sup>3</sup>  |
| 28 (C)  | Charge: | 1.063777  | Volume: | 65.419 Bohr <sup>3</sup>  |
| 29 (C)  | Charge: | 1.068485  | Volume: | 64.479 Bohr <sup>3</sup>  |
| 30 (C)  | Charge: | 0.997763  | Volume: | 63.299 Bohr <sup>3</sup>  |
| 31 (C)  | Charge: | 0.992031  | Volume: | 62.271 Bohr <sup>3</sup>  |

Table S 10: Addition of the QTAIM-charges of the atoms into fragments.

|                            |                   |    |                           |                   |
|----------------------------|-------------------|----|---------------------------|-------------------|
| <b>Os core</b>             |                   |    |                           |                   |
|                            | 0.989859          |    |                           |                   |
|                            | 0.667593          |    |                           |                   |
|                            | 0.989859          |    |                           |                   |
| <b><math>\Sigma</math></b> | <b>2.647311</b>   |    |                           |                   |
|                            |                   |    |                           |                   |
|                            |                   |    |                           |                   |
| <b>CO<sub>out,ax</sub></b> | <b>C</b>          |    | <b>O</b>                  |                   |
| 10                         | 1.112415          | 3  | -1.082865                 |                   |
| 25                         | 1.112425          | 18 | -1.082877                 |                   |
| <b><math>\Sigma</math></b> | <b>2.22484</b>    |    | <b>-2.165742</b>          | <b>0.059098</b>   |
| <b>average</b>             | <b>1.11242</b>    |    | <b>-1.082871</b>          | <b>0.029549</b>   |
|                            |                   |    |                           |                   |
| <b>CO<sub>out,eq</sub></b> | <b>C</b>          |    | <b>O</b>                  |                   |
| 11                         | 1.075248          | 4  | -1.099051                 |                   |
| 12                         | 1.061842          | 5  | -1.085804                 |                   |
| 13                         | 1.063778          | 6  | -1.08949                  |                   |
| 14                         | 1.068485          | 7  | -1.099167                 |                   |
| 26                         | 1.075248          | 19 | -1.09905                  |                   |
| 27                         | 1.061842          | 20 | -1.085804                 |                   |
| 28                         | 1.063777          | 21 | -1.089489                 |                   |
| 29                         | 1.068485          | 22 | -1.099166                 |                   |
| <b><math>\Sigma</math></b> | <b>8.538705</b>   |    | <b>-8.747021</b>          | <b>-0.208316</b>  |
| <b>average</b>             | <b>1.06733813</b> |    | <b>-1.09337763</b>        | <b>-0.0260395</b> |
|                            |                   |    |                           |                   |
| <b>CO<sub>cen,eq</sub></b> | <b>C</b>          |    | <b>O</b>                  |                   |
| 15                         | 0.997766          | 8  | -1.118869                 |                   |
| 16                         | 0.992029          | 9  | -1.119974                 |                   |
| 30                         | 0.997763          | 23 | -1.118865                 |                   |
| 31                         | 0.992031          | 24 | -1.119975                 |                   |
| <b><math>\Sigma</math></b> | <b>3.979589</b>   |    | <b>-4.477683</b>          | <b>-0.498094</b>  |
| <b>average</b>             | <b>0.99489725</b> |    | <b>-1.11942075</b>        | <b>-0.1245235</b> |
|                            |                   |    |                           |                   |
| <b>Test</b>                | <b>Test Sum</b>   |    | <b>Os(CO)<sub>5</sub></b> | <b>0.91525</b>    |
| 1.999999                   | 1.999999          |    | <b>Os(CO)<sub>4</sub></b> | <b>0.169499</b>   |

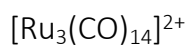

Normalization factor of the integral of electron density is 0.999792

The atomic charges after normalization and atomic volumes:

|         |         |           |         |                           |
|---------|---------|-----------|---------|---------------------------|
| 1 (Ru)  | Charge: | 0.850674  | Volume: | 98.113 Bohr <sup>3</sup>  |
| 2 (Ru)  | Charge: | 0.610090  | Volume: | 102.253 Bohr <sup>3</sup> |
| 3 (C)   | Charge: | 1.143366  | Volume: | 72.778 Bohr <sup>3</sup>  |
| 4 (C)   | Charge: | 1.093758  | Volume: | 67.039 Bohr <sup>3</sup>  |
| 5 (O)   | Charge: | -1.088244 | Volume: | 127.764 Bohr <sup>3</sup> |
| 6 (O)   | Charge: | -1.102432 | Volume: | 128.521 Bohr <sup>3</sup> |
| 7 (O)   | Charge: | -1.102370 | Volume: | 128.281 Bohr <sup>3</sup> |
| 8 (O)   | Charge: | -1.098883 | Volume: | 129.021 Bohr <sup>3</sup> |
| 9 (O)   | Charge: | -1.093207 | Volume: | 129.623 Bohr <sup>3</sup> |
| 10 (O)  | Charge: | -1.124845 | Volume: | 130.967 Bohr <sup>3</sup> |
| 11 (O)  | Charge: | -1.122831 | Volume: | 131.940 Bohr <sup>3</sup> |
| 12 (C)  | Charge: | 1.086975  | Volume: | 65.361 Bohr <sup>3</sup>  |
| 13 (C)  | Charge: | 1.094211  | Volume: | 66.278 Bohr <sup>3</sup>  |
| 14 (C)  | Charge: | 1.090743  | Volume: | 68.265 Bohr <sup>3</sup>  |
| 15 (C)  | Charge: | 1.035782  | Volume: | 63.002 Bohr <sup>3</sup>  |
| 16 (C)  | Charge: | 1.032259  | Volume: | 64.074 Bohr <sup>3</sup>  |
| 17 (Ru) | Charge: | 0.850674  | Volume: | 98.113 Bohr <sup>3</sup>  |
| 18 (C)  | Charge: | 1.143380  | Volume: | 72.778 Bohr <sup>3</sup>  |
| 19 (C)  | Charge: | 1.093753  | Volume: | 67.039 Bohr <sup>3</sup>  |
| 20 (O)  | Charge: | -1.088258 | Volume: | 127.764 Bohr <sup>3</sup> |
| 21 (O)  | Charge: | -1.102427 | Volume: | 128.521 Bohr <sup>3</sup> |
| 22 (O)  | Charge: | -1.102373 | Volume: | 128.281 Bohr <sup>3</sup> |
| 23 (O)  | Charge: | -1.098881 | Volume: | 129.021 Bohr <sup>3</sup> |
| 24 (O)  | Charge: | -1.093207 | Volume: | 129.623 Bohr <sup>3</sup> |
| 25 (O)  | Charge: | -1.124844 | Volume: | 130.967 Bohr <sup>3</sup> |
| 26 (O)  | Charge: | -1.122831 | Volume: | 131.940 Bohr <sup>3</sup> |
| 27 (C)  | Charge: | 1.086978  | Volume: | 65.361 Bohr <sup>3</sup>  |
| 28 (C)  | Charge: | 1.094210  | Volume: | 66.278 Bohr <sup>3</sup>  |
| 29 (C)  | Charge: | 1.090742  | Volume: | 68.265 Bohr <sup>3</sup>  |
| 30 (C)  | Charge: | 1.035781  | Volume: | 63.002 Bohr <sup>3</sup>  |
| 31 (C)  | Charge: | 1.032259  | Volume: | 64.074 Bohr <sup>3</sup>  |

Table S 11: Addition of the QTAIM-charges of the atoms into fragments.

|                 |                   |     |                           |                    |
|-----------------|-------------------|-----|---------------------------|--------------------|
| <b>Ru core</b>  |                   |     |                           |                    |
|                 | 0.850674          |     |                           |                    |
|                 | 0.61009           |     |                           |                    |
|                 | 0.850674          |     |                           |                    |
|                 | <b>2.311438</b>   |     |                           |                    |
|                 |                   |     |                           |                    |
|                 |                   |     |                           |                    |
| <b>CO-achse</b> | C                 |     | O                         |                    |
| 3               | 1.143366          | 5   | -1.088244                 |                    |
| 18              | 1.14338           | 20  | -1.088258                 |                    |
| $\Sigma$        | <b>2.286746</b>   |     | <b>-2.176502</b>          | <b>0.110244</b>    |
| <b>average</b>  | <b>1.143373</b>   |     | <b>-1.088251</b>          | <b>0.055122</b>    |
|                 |                   |     |                           |                    |
| <b>CO-equa</b>  | C                 |     | O                         |                    |
| C4              | 1.093758          | O6  | -1.102432                 |                    |
| C12             | 1.086975          | O7  | -1.10237                  |                    |
| C13             | 1.094211          | O8  | -1.098883                 |                    |
| C14             | 1.090743          | O9  | -1.093207                 |                    |
| C19             | 1.093753          | O21 | -1.102427                 |                    |
| C27             | 1.086978          | O22 | -1.102373                 |                    |
| C28             | 1.09421           | O23 | -1.098881                 |                    |
| C29             | 1.090742          | O24 | -1.093207                 |                    |
| $\Sigma$        | <b>8.73137</b>    |     | <b>-8.79378</b>           | <b>-0.06241</b>    |
| <b>average</b>  | <b>1.09142125</b> |     | <b>-1.0992225</b>         | <b>-0.00780125</b> |
|                 |                   |     |                           |                    |
| <b>CO-cent</b>  | C                 |     | O                         |                    |
| C15             | 1.035782          | O10 | -1.124845                 |                    |
| C16             | 1.032259          | O11 | -1.122831                 |                    |
| C30             | 1.035781          | O25 | -1.124844                 |                    |
| C31             | 1.032259          | O26 | -1.122831                 |                    |
| $\Sigma$        | <b>4.136081</b>   |     | <b>-4.495351</b>          | <b>-0.35927</b>    |
| <b>average</b>  | <b>1.03402025</b> |     | <b>-1.12383775</b>        | <b>-0.0898175</b>  |
|                 |                   |     |                           |                    |
| Test            | Test Sum          |     | <b>Ru(CO)<sub>5</sub></b> | <b>0.874591</b>    |
| 2.000002        | 2.000002          |     | <b>Ru(CO)<sub>4</sub></b> | <b>0.25082</b>     |

## 14. scXRD-Data

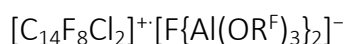

Table S 12: Crystal data and structure refinement for [anthracene<sup>Hal</sup>]<sup>+</sup> [F{Al(OR<sup>F</sup>)<sub>3</sub>}<sub>2</sub>]<sup>-</sup>.

CCDC number 2151155

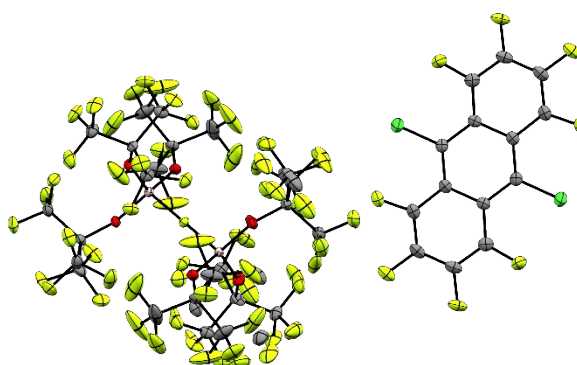





|                                           |                                                                   |
|-------------------------------------------|-------------------------------------------------------------------|
| $c$ [Å]                                   | 41.36(4)                                                          |
| $\alpha$ [°]                              | 90                                                                |
| $\beta$ [°]                               | 95.87(2)                                                          |
| $\gamma$ [°]                              | 90                                                                |
| Volume [Å <sup>3</sup> ]                  | 9752(15)                                                          |
| $Z$                                       | 8                                                                 |
| $\rho_{\text{calc}}$ [gcm <sup>-3</sup> ] | 2.383                                                             |
| $\mu$ [mm <sup>-1</sup> ]                 | 1.440                                                             |
| $F(000)$                                  | 6640                                                              |
| Crystal size [mm <sup>3</sup> ]           | 0.23×0.17×0.05                                                    |
| Crystal colour                            | red                                                               |
| Crystal shape                             | plate                                                             |
| Radiation                                 | MoK $_{\alpha}$ ( $\lambda=0.71073$ Å)                            |
| 2 $\theta$ range [°]                      | 1.98 to 56.04 (0.76 Å)                                            |
| Index ranges                              | -20 ≤ $h$ ≤ 20<br>-19 ≤ $k$ ≤ 16<br>-54 ≤ $l$ ≤ 54                |
| Reflections collected                     | 135688                                                            |
| Independent reflections                   | 23163<br>$R_{\text{int}} = 0.1000$<br>$R_{\text{sigma}} = 0.0867$ |
| Completeness to $\theta = 25.242^\circ$   | 99.9 %                                                            |
| Data / Restraints / Parameters            | 23163/19111/1966                                                  |
| Goodness-of-fit on $F^2$                  | 1.005                                                             |
| Final $R$ indexes [ $I \geq 2\sigma(I)$ ] | $R_1 = 0.0436$<br>$wR_2 = 0.0740$                                 |
| Final $R$ indexes [all data]              | $R_1 = 0.0889$<br>$wR_2 = 0.0867$                                 |
| Largest peak/hole [eÅ <sup>-3</sup> ]     | 0.81/-1.03                                                        |

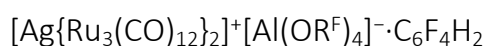

Table S 13: Crystal data and structure refinement for  $[\text{Ag}\{\text{Ru}_3(\text{CO})_{12}\}_2]^+[\text{Al}(\text{OR}^F)_4]^- \cdot \text{C}_6\text{F}_4\text{H}_2$ .

|                          |                                                                    |
|--------------------------|--------------------------------------------------------------------|
| CCDC number              | 2151852                                                            |
| Empirical formula        | $\text{C}_{46}\text{H}_2\text{AgAlF}_{40}\text{O}_{28}\text{Ru}_6$ |
| Formula weight           | 2503.75                                                            |
| Temperature [K]          | 100(2)                                                             |
| Crystal system           | triclinic                                                          |
| Space group (number)     | $P\bar{1}$ (2)                                                     |
| $a$ [Å]                  | 12.349(6)                                                          |
| $b$ [Å]                  | 12.385(4)                                                          |
| $c$ [Å]                  | 23.041(10)                                                         |
| $\alpha$ [°]             | 90.85(2)                                                           |
| $\beta$ [°]              | 94.031(10)                                                         |
| $\gamma$ [°]             | 93.152(13)                                                         |
| Volume [Å <sup>3</sup> ] | 3509(3)                                                            |
| $Z$                      | 2                                                                  |

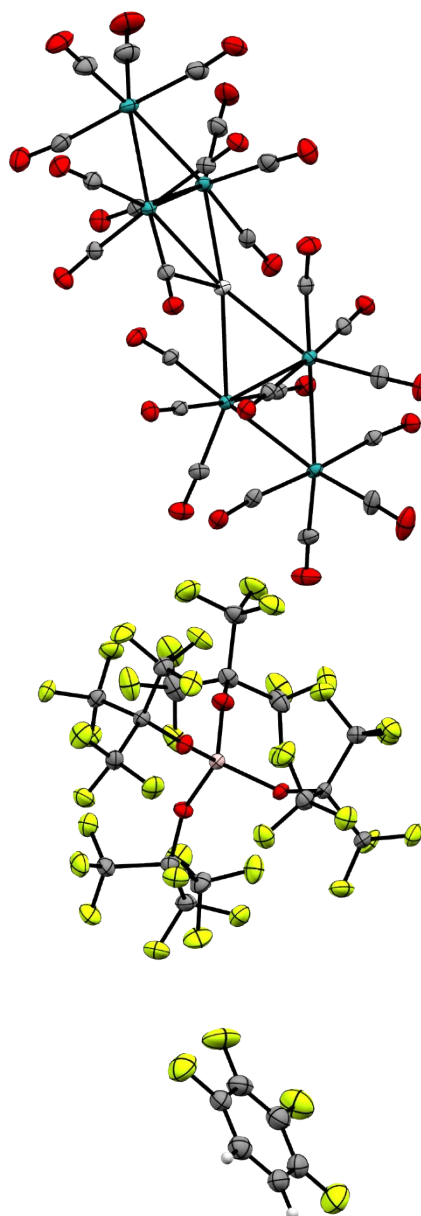

|                                           |                                                                   |
|-------------------------------------------|-------------------------------------------------------------------|
| $\rho_{\text{calc}}$ [gcm <sup>-3</sup> ] | 2.369                                                             |
| $\mu$ [mm <sup>-1</sup> ]                 | 1.728                                                             |
| $F(000)$                                  | 2372                                                              |
| Crystal size [mm <sup>3</sup> ]           | 0.24×0.15×0.05                                                    |
| Crystal colour                            | red                                                               |
| Crystal shape                             | needle                                                            |
| Radiation                                 | MoK $\alpha$ ( $\lambda=0.71073$ Å)                               |
| 2 $\theta$ range [°]                      | 3.29 to 66.43 (0.65 Å)                                            |
| Index ranges                              | -18 ≤ h ≤ 19<br>-19 ≤ k ≤ 18<br>-35 ≤ l ≤ 35                      |
| Reflections collected                     | 206219                                                            |
| Independent reflections                   | 26616<br>$R_{\text{int}} = 0.0858$<br>$R_{\text{sigma}} = 0.0574$ |
| Completeness to $\theta = 25.242^\circ$   | 100.0 %                                                           |
| Data / Restraints / Parameters            | 26616/7259/1444                                                   |
| Goodness-of-fit on $F^2$                  | 1.070                                                             |
| Final $R$ indexes [ $I \geq 2\sigma(I)$ ] | $R_1 = 0.0495$<br>$wR_2 = 0.0955$                                 |
| Final $R$ indexes [all data]              | $R_1 = 0.0723$<br>$wR_2 = 0.1053$                                 |
| Largest peak/hole [eÅ <sup>-3</sup> ]     | 1.15/-2.02                                                        |

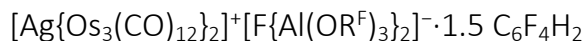

Table S 14: Crystal data and structure refinement for  $[\text{Ag}\{\text{Os}_3(\text{CO})_{12}\}_2]^+[\text{F}\{\text{Al}(\text{OR}^{\text{F}})_3\}_2]^- \cdot 1.5 \text{C}_6\text{F}_4\text{H}_2$ .

|                                           |                                                                                                  |
|-------------------------------------------|--------------------------------------------------------------------------------------------------|
| CCDC number                               | 2151840                                                                                          |
| Empirical formula                         | C <sub>57</sub> H <sub>3</sub> AgAl <sub>2</sub> F <sub>61</sub> O <sub>30</sub> Os <sub>6</sub> |
| Formula weight                            | 3629.62                                                                                          |
| Temperature [K]                           | 100(2)                                                                                           |
| Crystal system                            | monoclinic                                                                                       |
| Space group (number)                      | $P2_1/c$ (14)                                                                                    |
| $a$ [Å]                                   | 20.504(4)                                                                                        |
| $b$ [Å]                                   | 17.810(3)                                                                                        |
| $c$ [Å]                                   | 25.217(8)                                                                                        |
| $\alpha$ [°]                              | 90                                                                                               |
| $\beta$ [°]                               | 107.09(2)                                                                                        |
| $\gamma$ [°]                              | 90                                                                                               |
| Volume [Å <sup>3</sup> ]                  | 8802(4)                                                                                          |
| $Z$                                       | 4                                                                                                |
| $\rho_{\text{calc}}$ [gcm <sup>-3</sup> ] | 2.739                                                                                            |
| $\mu$ [mm <sup>-1</sup> ]                 | 9.070                                                                                            |
| $F(000)$                                  | 6652                                                                                             |
| Crystal size [mm <sup>3</sup> ]           | 0.14×0.12×0.05                                                                                   |
| Crystal colour                            | colourless                                                                                       |
| Crystal shape                             | block                                                                                            |
| Radiation                                 | MoK $\alpha$ ( $\lambda=0.71073$ Å)                                                              |

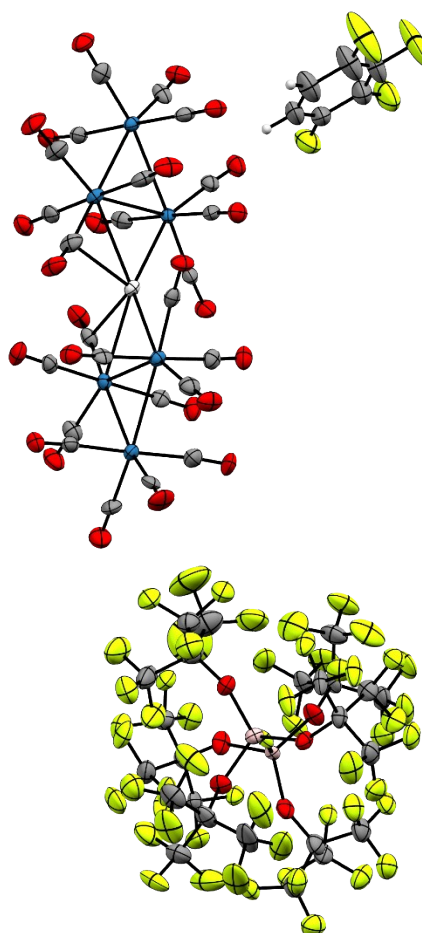

|                                         |                                                                   |
|-----------------------------------------|-------------------------------------------------------------------|
| 2 $\theta$ range [°]                    | 2.84 to 54.29 (0.78 Å)                                            |
| Index ranges                            | -26 ≤ h ≤ 26<br>-22 ≤ k ≤ 22<br>-32 ≤ l ≤ 31                      |
| Reflections collected                   | 158056                                                            |
| Independent reflections                 | 19471<br>$R_{\text{int}} = 0.0589$<br>$R_{\text{sigma}} = 0.0323$ |
| Completeness to $\Theta = 25.242^\circ$ | 100.0 %                                                           |
| Data / Restraints / Parameters          | 19471/27525/2368                                                  |
| Goodness-of-fit on $F^2$                | 1.124                                                             |
| Final $R$ indexes [I ≥ 2 $\sigma$ (I)]  | $R_1 = 0.0420$<br>$wR_2 = 0.0881$                                 |
| Final $R$ indexes [all data]            | $R_1 = 0.0587$<br>$wR_2 = 0.0965$                                 |
| Largest peak/hole [eÅ <sup>-3</sup> ]   | 1.52/-1.93                                                        |

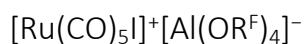

Table S 15: Crystal data and structure refinement for  $[\text{Ru}(\text{CO})_5\text{I}]^+[\text{Al}(\text{OR}^{\text{F}})_4]^-$ .

|                                           |                                                                      |
|-------------------------------------------|----------------------------------------------------------------------|
| CCDC number                               | 2151510                                                              |
| Empirical formula                         | $\text{C}_{21}\text{AlF}_{36}\text{IO}_9\text{Ru}$                   |
| Formula weight                            | 1335.16                                                              |
| Temperature [K]                           | 100(2)                                                               |
| Crystal system                            | tetragonal                                                           |
| Space group (number)                      | $P4/n$ (85)                                                          |
| $a$ [Å]                                   | 13.7680(16)                                                          |
| $b$ [Å]                                   | 13.7680(16)                                                          |
| $c$ [Å]                                   | 9.5388(12)                                                           |
| $\alpha$ [°]                              | 90                                                                   |
| $\beta$ [°]                               | 90                                                                   |
| $\gamma$ [°]                              | 90                                                                   |
| Volume [Å <sup>3</sup> ]                  | 1808.2(5)                                                            |
| $Z$                                       | 2                                                                    |
| $\rho_{\text{calc}}$ [gcm <sup>-3</sup> ] | 2.452                                                                |
| $\mu$ [mm <sup>-1</sup> ]                 | 1.547                                                                |
| $F(000)$                                  | 1264                                                                 |
| Crystal size [mm <sup>3</sup> ]           | 0.18×0.10×0.05                                                       |
| Crystal colour                            | yellow                                                               |
| Crystal shape                             | needle                                                               |
| Radiation                                 | $\text{MoK}\alpha$ ( $\lambda=0.71073$ Å)                            |
| $2\theta$ range [°]                       | 2.96 to 63.05 (0.68 Å)                                               |
| Index ranges                              | $-20 \leq h \leq 20$<br>$-20 \leq k \leq 20$<br>$-13 \leq l \leq 14$ |
| Reflections collected                     | 134767                                                               |
| Independent reflections                   | 3025                                                                 |
|                                           | $R_{\text{int}} = 0.0816$                                            |
|                                           | $R_{\text{sigma}} = 0.0163$                                          |
| Completeness to $\theta = 25.242^\circ$   | 100.0 %                                                              |
| Data / Restraints / Parameters            | 3025/306/160                                                         |
| Goodness-of-fit on $F^2$                  | 1.073                                                                |
| Final $R$ indexes [ $I \geq 2\sigma(I)$ ] | $R_1 = 0.0250$<br>$wR_2 = 0.0648$                                    |
| Final $R$ indexes [all data]              | $R_1 = 0.0288$<br>$wR_2 = 0.0676$                                    |
| Largest peak/hole [eÅ <sup>-3</sup> ]     | 0.84/-0.98                                                           |

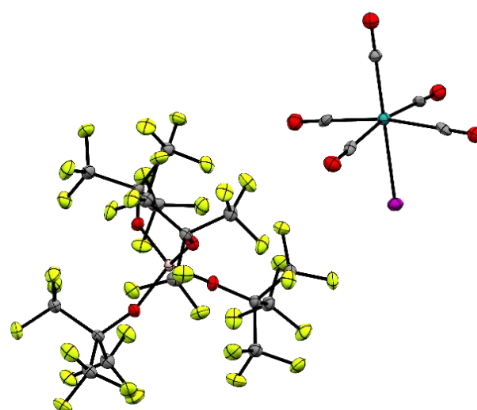

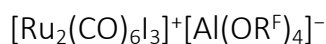

Table S 16: Crystal data and structure refinement for  $[\text{Ru}_2(\text{CO})_6\text{I}_3]^+[\text{Al}(\text{OR}^{\text{F}})_4]^-$ .

|                                           |                                                                  |
|-------------------------------------------|------------------------------------------------------------------|
| CCDC number                               | 2153977                                                          |
| Empirical formula                         | $\text{C}_{22}\text{AlF}_{36}\text{I}_3\text{O}_{10}\text{Ru}_2$ |
| Formula weight                            | 1718.04                                                          |
| Temperature [K]                           | 109(2)                                                           |
| Crystal system                            | orthorhombic                                                     |
| Space group (number)                      | $Pnma$ (62)                                                      |
| $a$ [Å]                                   | 18.581(3)                                                        |
| $b$ [Å]                                   | 13.756(2)                                                        |
| $c$ [Å]                                   | 16.816(3)                                                        |
| $\alpha$ [°]                              | 90                                                               |
| $\beta$ [°]                               | 90                                                               |
| $\gamma$ [°]                              | 90                                                               |
| Volume [Å <sup>3</sup> ]                  | 4298.3(13)                                                       |
| $Z$                                       | 4                                                                |
| $\rho_{\text{calc}}$ [gcm <sup>-3</sup> ] | 2.655                                                            |
| $\mu$ [mm <sup>-1</sup> ]                 | 3.083                                                            |
| $F(000)$                                  | 3184                                                             |
| Crystal size [mm <sup>3</sup> ]           | 0.11×0.09×0.07                                                   |
| Crystal colour                            | yellow                                                           |
| Crystal shape                             | block                                                            |
| Radiation                                 | $\text{MoK}_\alpha$ ( $\lambda=0.71073$ Å)                       |
| $2\theta$ range [°]                       | 3.27 to 66.40 (0.65 Å)                                           |
| Index ranges                              | -27 ≤ $h$ ≤ 28<br>-19 ≤ $k$ ≤ 21<br>-25 ≤ $l$ ≤ 25               |
| Reflections collected                     | 182411                                                           |
| Independent reflections                   | 8508                                                             |
|                                           | $R_{\text{int}} = 0.0509$                                        |
|                                           | $R_{\text{sigma}} = 0.0179$                                      |
| Completeness to $\theta = 25.242^\circ$   | 100.0 %                                                          |
| Data / Restraints / Parameters            | 8508/12323/1110                                                  |
| Goodness-of-fit on $F^2$                  | 1.193                                                            |
| Final $R$ indexes [ $I \geq 2\sigma(I)$ ] | $R_1 = 0.0528$<br>$wR_2 = 0.1077$                                |
| Final $R$ indexes [all data]              | $R_1 = 0.0604$<br>$wR_2 = 0.1107$                                |
| Largest peak/hole [eÅ <sup>-3</sup> ]     | 1.51/-1.51                                                       |

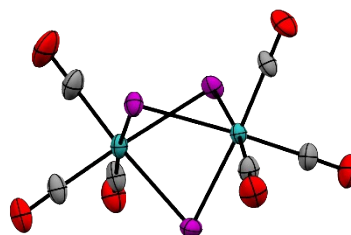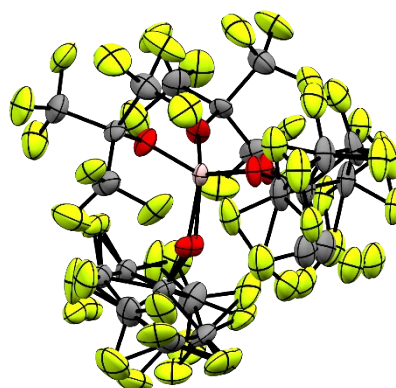

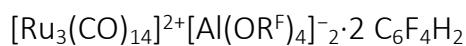

Table S 17: Crystal data and structure refinement

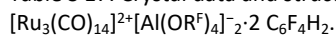

|                                            |                                                                           |
|--------------------------------------------|---------------------------------------------------------------------------|
| CCDC number                                | 2150901                                                                   |
| Empirical formula                          | $\text{C}_{58}\text{H}_4\text{Al}_2\text{F}_{80}\text{O}_{22}\text{Ru}_3$ |
| Formula weight                             | 2929.78                                                                   |
| Temperature [K]                            | 106(2)                                                                    |
| Crystal system                             | triclinic                                                                 |
| Space group (number)                       | $P\bar{1}$ (2)                                                            |
| $a$ [Å]                                    | 11.298(4)                                                                 |
| $b$ [Å]                                    | 14.164(6)                                                                 |
| $c$ [Å]                                    | 15.698(5)                                                                 |
| $\alpha$ [°]                               | 71.621(10)                                                                |
| $\beta$ [°]                                | 71.685(18)                                                                |
| $\gamma$ [°]                               | 73.388(12)                                                                |
| Volume [Å <sup>3</sup> ]                   | 2213.9(14)                                                                |
| $Z$                                        | 1                                                                         |
| $\rho_{\text{calc}}$ [gcm <sup>-3</sup> ]  | 2.197                                                                     |
| $\mu$ [mm <sup>-1</sup> ]                  | 0.763                                                                     |
| $F(000)$                                   | 1406                                                                      |
| Crystal size [mm <sup>3</sup> ]            | 0.12×0.11×0.07                                                            |
| Crystal colour                             | colourless                                                                |
| Crystal shape                              | block                                                                     |
| Radiation                                  | $\text{MoK}\alpha$ ( $\lambda=0.71073$ Å)                                 |
| 2 $\theta$ range [°]                       | 2.82 to 56.73 (0.75 Å)                                                    |
| Index ranges                               | -15 ≤ $h$ ≤ 15<br>-18 ≤ $k$ ≤ 18<br>-20 ≤ $l$ ≤ 20                        |
| Reflections collected                      | 201036                                                                    |
| Independent reflections                    | 11068<br>$R_{\text{int}} = 0.0544$<br>$R_{\text{sigma}} = 0.0155$         |
| Completeness to<br>$\theta = 25.242^\circ$ | 100.0 %                                                                   |
| Data / Restraints /<br>Parameters          | 11068/0/745                                                               |
| Goodness-of-fit on $F^2$                   | 1.017                                                                     |
| Final $R$ indexes                          | $R_1 = 0.0192$                                                            |
| [ $I \geq 2\sigma(I)$ ]                    | $wR_2 = 0.0453$                                                           |
| Final $R$ indexes                          | $R_1 = 0.0217$                                                            |
| [all data]                                 | $wR_2 = 0.0463$                                                           |
| Largest peak/hole [eÅ <sup>-3</sup> ]      | 0.49/-0.55                                                                |

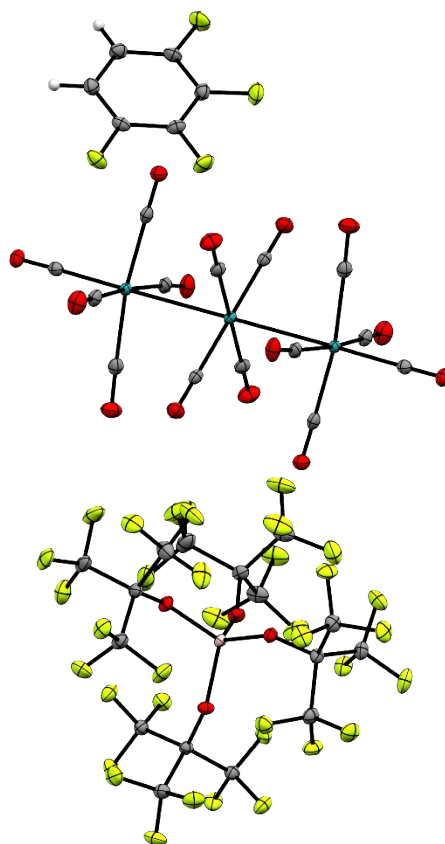

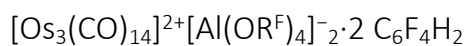

Table S 18: Crystal data and structure refinement

$[\text{Os}_3(\text{CO})_{14}]^{2+}[\text{Al}(\text{OR}^{\text{F}})_4]^{-}_2 \cdot 2 \text{C}_6\text{F}_4\text{H}_2$ .

|                                           |                                                                           |
|-------------------------------------------|---------------------------------------------------------------------------|
| CCDC number                               | 2150925                                                                   |
| Empirical formula                         | $\text{C}_{58}\text{H}_4\text{Al}_2\text{F}_{80}\text{O}_{22}\text{Os}_3$ |
| Formula weight                            | 152.25                                                                    |
| Temperature [K]                           | 100(2)                                                                    |
| Crystal system                            | triclinic                                                                 |
| Space group (number)                      | $P\bar{1}$ (2)                                                            |
| $a$ [Å]                                   | 11.283(3)                                                                 |
| $b$ [Å]                                   | 14.143(3)                                                                 |
| $c$ [Å]                                   | 15.714(3)                                                                 |
| $\alpha$ [°]                              | 71.674(9)                                                                 |
| $\beta$ [°]                               | 71.730(7)                                                                 |
| $\gamma$ [°]                              | 73.486(9)                                                                 |
| Volume [Å <sup>3</sup> ]                  | 2211.8(8)                                                                 |
| $Z$                                       | 1                                                                         |
| $\rho_{\text{calc}}$ [gcm <sup>-3</sup> ] | 2.400                                                                     |
| $\mu$ [mm <sup>-1</sup> ]                 | 4.556                                                                     |
| $F(000)$                                  | 1502                                                                      |
| Crystal size [mm <sup>3</sup> ]           | 0.252×0.081×0.029                                                         |
| Crystal colour                            | colourless                                                                |
| Crystal shape                             | block                                                                     |
| Radiation                                 | $\text{MoK}_\alpha$ ( $\lambda=0.71073$ Å)                                |
| $2\theta$ range [°]                       | 2.82 to 61.30 (0.70 Å)                                                    |
| Index ranges                              | $-15 \leq h \leq 16$<br>$-18 \leq k \leq 20$<br>$0 \leq l \leq 22$        |
| Reflections collected                     | 13532                                                                     |
| Independent reflections                   | 13532                                                                     |
|                                           | $R_{\text{int}} = 0.0544$                                                 |
|                                           | $R_{\text{sigma}} = 0.0526$                                               |
| Completeness to $\theta = 25.242^\circ$   | 100.0 %                                                                   |
| Data / Restraints / Parameters            | 13532/3053/745                                                            |
| Goodness-of-fit on $F^2$                  | 1.000                                                                     |
| Final $R$ indexes [ $I \geq 2\sigma(I)$ ] | $R_1 = 0.0411$<br>$wR_2 = 0.0665$                                         |
| Final $R$ indexes [all data]              | $R_1 = 0.0604$<br>$wR_2 = 0.0713$                                         |
| Largest peak/hole [eÅ <sup>-3</sup> ]     | 1.19/-2.39                                                                |

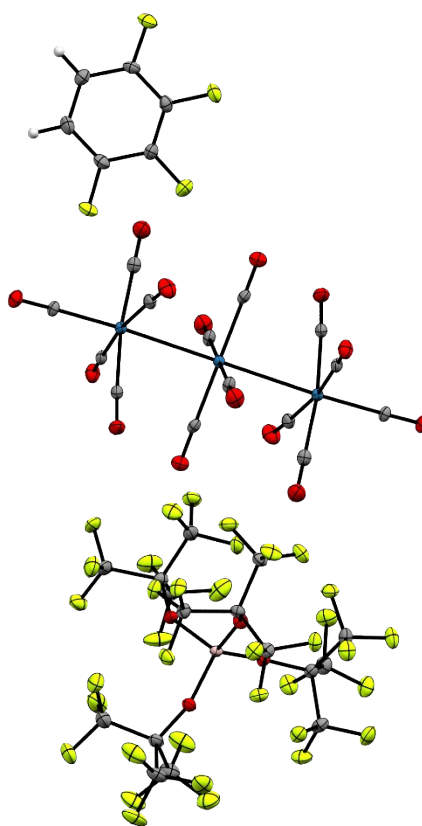



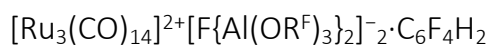

Table S 19: Crystal data and structure refinement

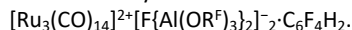

|                                           |                                                                            |
|-------------------------------------------|----------------------------------------------------------------------------|
| CCDC number                               | 2159967                                                                    |
| Empirical formula                         | $\text{C}_{68}\text{H}_2\text{Al}_4\text{F}_{114}\text{O}_{26}\text{Ru}_3$ |
| Formula weight                            | 3811.83                                                                    |
| Temperature [K]                           | 100(2)                                                                     |
| Crystal system                            | triclinic                                                                  |
| Space group (number)                      | $P\bar{1}$ (2)                                                             |
| $a$ [Å]                                   | 11.819(3)                                                                  |
| $b$ [Å]                                   | 12.940(3)                                                                  |
| $c$ [Å]                                   | 19.477(5)                                                                  |
| $\alpha$ [°]                              | 102.636(12)                                                                |
| $\beta$ [°]                               | 103.912(17)                                                                |
| $\gamma$ [°]                              | 92.736(17)                                                                 |
| Volume [Å <sup>3</sup> ]                  | 2805.5(12)                                                                 |
| $Z$                                       | 1                                                                          |
| $\rho_{\text{calc}}$ [gcm <sup>-3</sup> ] | 2.256                                                                      |
| $\mu$ [mm <sup>-1</sup> ]                 | 0.689                                                                      |
| $F(000)$                                  | 1828                                                                       |
| Crystal size [mm <sup>3</sup> ]           | 0.231×0.134×0.115                                                          |
| Crystal colour                            | colourless                                                                 |
| Crystal shape                             | plate                                                                      |
| Radiation                                 | $\text{MoK}_\alpha$ ( $\lambda=0.71073$ Å)                                 |
| $2\theta$ range [°]                       | 3.24 to 64.21 (0.67 Å)                                                     |
| Index ranges                              | -17 ≤ $h$ ≤ 17<br>-19 ≤ $k$ ≤ 19<br>-29 ≤ $l$ ≤ 28                         |
| Reflections collected                     | 227209                                                                     |
| Independent reflections                   | 19545<br>$R_{\text{int}} = 0.0779$<br>$R_{\text{sigma}} = 0.0343$          |
| Completeness to $\theta = 25.242^\circ$   | 99.1 %                                                                     |
| Data / Restraints / Parameters            | 19545/10839/1265                                                           |
| Goodness-of-fit on $F^2$                  | 1.032                                                                      |
| Final $R$ indexes [ $I \geq 2\sigma(I)$ ] | $R_1 = 0.0382$<br>$wR_2 = 0.0869$                                          |
| Final $R$ indexes [all data]              | $R_1 = 0.0513$<br>$wR_2 = 0.0962$                                          |
| Largest peak/hole [eÅ <sup>-3</sup> ]     | 0.88/-0.81                                                                 |

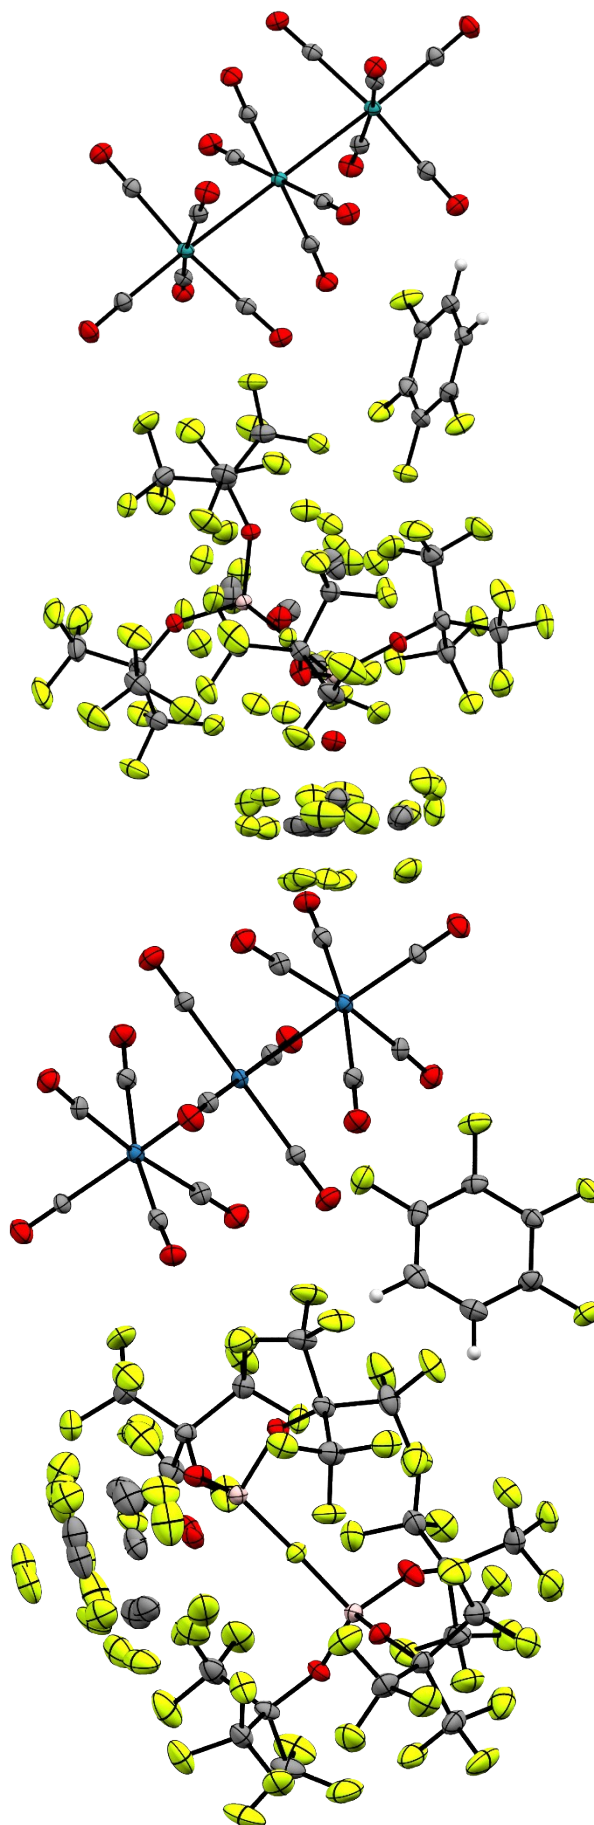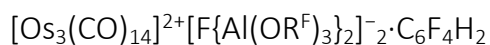

Table S 20: Crystal data and structure refinement  $[\text{Os}_3(\text{CO})_{14}]^{2+}[\text{F}\{\text{Al}(\text{OR}^f)_3\}_2]^{-2} \cdot \text{C}_6\text{F}_4\text{H}_2$ .

|                                           |                                                                            |
|-------------------------------------------|----------------------------------------------------------------------------|
| CCDC number                               | 2151836                                                                    |
| Empirical formula                         | $\text{C}_{68}\text{H}_2\text{Al}_4\text{F}_{114}\text{O}_{26}\text{Os}_3$ |
| Formula weight                            | 4079.22                                                                    |
| Temperature [K]                           | 100(2)                                                                     |
| Crystal system                            | triclinic                                                                  |
| Space group (number)                      | $P\bar{1}$ (2)                                                             |
| $a$ [Å]                                   | 11.810(4)                                                                  |
| $b$ [Å]                                   | 12.939(2)                                                                  |
| $c$ [Å]                                   | 19.507(5)                                                                  |
| $\alpha$ [°]                              | 102.689(9)                                                                 |
| $\beta$ [°]                               | 103.941(14)                                                                |
| $\gamma$ [°]                              | 92.667(9)                                                                  |
| Volume [Å <sup>3</sup> ]                  | 2806.9(13)                                                                 |
| $Z$                                       | 1                                                                          |
| $\rho_{\text{calc}}$ [gcm <sup>-3</sup> ] | 2.413                                                                      |
| $\mu$ [mm <sup>-1</sup> ]                 | 3.677                                                                      |
| $F(000)$                                  | 1924                                                                       |
| Crystal size [mm <sup>3</sup> ]           | 0.103×0.080×0.071                                                          |
| Crystal colour                            | white                                                                      |
| Crystal shape                             | block                                                                      |
| Radiation                                 | $\text{MoK}_\alpha$ ( $\lambda=0.71073$ Å)                                 |
| $2\theta$ range [°]                       | 3.24 to 64.18 (0.67 Å)                                                     |
| Index ranges                              | -15 ≤ $h$ ≤ 17<br>-19 ≤ $k$ ≤ 19<br>-29 ≤ $l$ ≤ 28                         |
| Reflections collected                     | 86130                                                                      |
| Independent reflections                   | 19196<br>$R_{\text{int}} = 0.0673$<br>$R_{\text{sigma}} = 0.0590$          |
| Completeness to $\Theta = 25.242^\circ$   | 100.0 %                                                                    |
| Data / Restraints / Parameters            | 19196/8318/1142                                                            |
| Goodness-of-fit on $F^2$                  | 1.003                                                                      |
| Final $R$ indexes [ $I \geq 2\sigma(I)$ ] | $R_1 = 0.0415$<br>$wR_2 = 0.0901$                                          |
| Final $R$ indexes [all data]              | $R_1 = 0.0672$<br>$wR_2 = 0.1020$                                          |
| Largest peak/hole [eÅ <sup>-3</sup> ]     | 2.00/-2.13                                                                 |

## 15. DFT

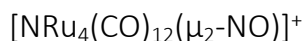

Method: (RI-)B3LYP(D3BJ)/def2-TZVPP

Symmetry: c1

Cartesian coordinates in Ångström:

|    |            |            |            |
|----|------------|------------|------------|
| N  | 0.1055038  | 0.6716612  | 0.3803071  |
| C  | 2.1827995  | 2.4394233  | -1.0973169 |
| O  | -1.6463413 | 0.9431299  | 4.0361398  |
| Ru | -0.6168509 | 0.2073810  | -1.5961090 |
| O  | 2.3327399  | 3.4774906  | -1.5306034 |
| Ru | 0.4324857  | -1.3849855 | 0.9307298  |
| Ru | -1.6940651 | 0.5101912  | 1.0251659  |
| O  | 2.9012629  | -3.1773637 | 0.5146872  |
| O  | -3.4637628 | -0.4503456 | -2.5673319 |
| Ru | 1.8864146  | 0.7179888  | -0.3304804 |
| O  | 3.9922525  | -0.6760052 | -2.0940926 |
| C  | 1.9997650  | -2.5072495 | 0.6632567  |
| C  | -2.5975498 | 2.1599007  | 0.7078924  |
| C  | -0.8735504 | 2.0509467  | -1.9838240 |
| O  | 1.4216143  | -0.5489225 | 3.6743691  |
| C  | 3.1031674  | 1.0426529  | 1.1024579  |
| O  | -3.1024272 | 3.1585372  | 0.5190005  |
| O  | -4.2820071 | -1.1596723 | 1.0428770  |
| O  | -1.0214982 | 3.1527721  | -2.2005825 |
| C  | -3.3583513 | -0.5023054 | 1.0757905  |
| O  | 3.8002397  | 1.2508697  | 1.9734253  |
| C  | -1.6835413 | 0.7694952  | 2.9152889  |
| C  | 1.0539760  | -0.8703373 | 2.6524100  |
| C  | -2.4210215 | -0.2042205 | -2.1986839 |
| C  | 3.2601545  | -0.1165560 | -1.4327790 |
| N  | -0.2864917 | -1.8128191 | -1.0231320 |
| O  | -0.4471039 | -2.8112561 | -1.5856969 |
| O  | -1.4970116 | -3.4334444 | 2.1799133  |
| C  | -0.7956492 | -2.6701454 | 1.7224622  |
| O  | 0.9376086  | -0.1886571 | -4.2243928 |
| C  | 0.3772388  | -0.0381548 | -3.2511487 |

SCF energy GE0OPT = -1924.433691867 H

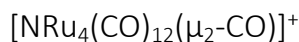

Method: (RI-)B3LYP(D3BJ)/def2-TZVPP

Symmetry: cs

Cartesian coordinates in Ångström:

|    |            |            |            |
|----|------------|------------|------------|
| N  | 0.3063936  | -0.7836687 | 0.0000000  |
| C  | -0.6092413 | -2.2813562 | 2.5924277  |
| O  | 3.0142188  | -1.7315061 | -2.7752733 |
| Ru | -1.6204877 | 0.2199349  | 0.0000000  |
| O  | -1.1352551 | -3.2203300 | 2.9519239  |
| Ru | 1.1447010  | 1.0957348  | 0.0000000  |
| Ru | 0.2850068  | -0.7218109 | -1.9305131 |
| O  | 1.6118789  | 3.0270784  | 2.3597964  |
| O  | -3.2969712 | 0.8461951  | -2.5158691 |
| Ru | 0.2850068  | -0.7218109 | 1.9305131  |
| O  | -0.1663324 | 0.9083282  | 4.5052114  |
| C  | 1.4309912  | 2.3037482  | 1.5056728  |
| C  | -0.6092413 | -2.2813562 | -2.5924277 |
| C  | -2.3966692 | -1.5866970 | 0.0000000  |
| O  | 4.0344598  | 0.2758713  | 0.0000000  |
| C  | 1.9849795  | -1.3513834 | 2.4864827  |
| O  | -1.1352551 | -3.2203300 | -2.9519239 |
| O  | -0.1663324 | 0.9083282  | -4.5052114 |
| O  | -2.8653498 | -2.6121268 | 0.0000000  |
| C  | 0.0149839  | 0.2671907  | -3.5883642 |
| O  | 3.0142188  | -1.7315061 | 2.7752733  |
| C  | 1.9849795  | -1.3513834 | -2.4864827 |
| C  | 2.9488240  | 0.6082322  | 0.0000000  |
| C  | -2.6541599 | 0.6157062  | -1.6116296 |
| C  | 0.0149839  | 0.2671907  | 3.5883642  |
| C  | -1.1893576 | 2.1659620  | 0.0000000  |

|   |            |           |            |
|---|------------|-----------|------------|
| O | -1.3350526 | 3.2932790 | 0.0000000  |
| O | 1.6118789  | 3.0270784 | -2.3597964 |
| C | 1.4309912  | 2.3037482 | -1.5056728 |
| O | -3.2969712 | 0.8461951 | 2.5158691  |
| C | -2.6541599 | 0.6157062 | 1.6116296  |

SCF energy GEOOPT = -1907.864596087 H  
 ZPE = 304.9 kJ/mol  
 FREEH energy = 402.75 kJ/mol  
 FREEH entropy = 0.98869 kJ/mol/K

\$vibrational spectrum

| #  | mode | symmetry | wave number<br>cm**(-1) | IR intensity<br>km/mol | selection rules |       |
|----|------|----------|-------------------------|------------------------|-----------------|-------|
| #  |      |          |                         |                        | IR              | RAMAN |
| 1  |      |          | -0.00                   | 0.00000                | -               | -     |
| 2  |      |          | -0.00                   | 0.00000                | -               | -     |
| 3  |      |          | -0.00                   | 0.00000                | -               | -     |
| 4  |      |          | 0.00                    | 0.00000                | -               | -     |
| 5  |      |          | 0.00                    | 0.00000                | -               | -     |
| 6  |      |          | 0.00                    | 0.00000                | -               | -     |
| 7  |      | a"       | 30.28                   | 0.00372                | YES             | YES   |
| 8  |      | a"       | 33.88                   | 0.00017                | YES             | YES   |
| 9  |      | a'       | 37.00                   | 0.00763                | YES             | YES   |
| 10 |      | a'       | 39.13                   | 0.08426                | YES             | YES   |
| 11 |      | a"       | 47.83                   | 0.09296                | YES             | YES   |
| 12 |      | a"       | 58.27                   | 0.43180                | YES             | YES   |
| 13 |      | a'       | 62.02                   | 0.15351                | YES             | YES   |
| 14 |      | a'       | 64.88                   | 0.51978                | YES             | YES   |
| 15 |      | a"       | 67.15                   | 0.35152                | YES             | YES   |
| 16 |      | a'       | 69.47                   | 0.08997                | YES             | YES   |
| 17 |      | a"       | 71.46                   | 0.12201                | YES             | YES   |
| 18 |      | a"       | 77.78                   | 0.00891                | YES             | YES   |
| 19 |      | a'       | 78.16                   | 0.20635                | YES             | YES   |
| 20 |      | a'       | 79.64                   | 0.11887                | YES             | YES   |
| 21 |      | a"       | 80.19                   | 0.12092                | YES             | YES   |
| 22 |      | a'       | 83.10                   | 0.24152                | YES             | YES   |
| 23 |      | a"       | 86.70                   | 0.90054                | YES             | YES   |
| 24 |      | a'       | 90.34                   | 0.28086                | YES             | YES   |
| 25 |      | a"       | 90.82                   | 0.06019                | YES             | YES   |
| 26 |      | a'       | 91.83                   | 0.02545                | YES             | YES   |
| 27 |      | a'       | 93.65                   | 0.21807                | YES             | YES   |
| 28 |      | a"       | 95.42                   | 0.03486                | YES             | YES   |
| 29 |      | a"       | 95.70                   | 0.51591                | YES             | YES   |
| 30 |      | a'       | 96.92                   | 0.04071                | YES             | YES   |
| 31 |      | a"       | 99.92                   | 0.00469                | YES             | YES   |
| 32 |      | a'       | 123.27                  | 0.15035                | YES             | YES   |
| 33 |      | a'       | 136.02                  | 0.20988                | YES             | YES   |
| 34 |      | a"       | 139.11                  | 0.03435                | YES             | YES   |
| 35 |      | a'       | 165.49                  | 0.09800                | YES             | YES   |
| 36 |      | a'       | 171.00                  | 1.04472                | YES             | YES   |
| 37 |      | a"       | 174.44                  | 17.41513               | YES             | YES   |
| 38 |      | a'       | 236.34                  | 0.33566                | YES             | YES   |
| 39 |      | a'       | 347.79                  | 10.24511               | YES             | YES   |
| 40 |      | a"       | 360.64                  | 0.35731                | YES             | YES   |
| 41 |      | a"       | 372.46                  | 11.28255               | YES             | YES   |
| 42 |      | a'       | 374.77                  | 18.92598               | YES             | YES   |
| 43 |      | a"       | 382.34                  | 11.92759               | YES             | YES   |
| 44 |      | a'       | 385.67                  | 5.98985                | YES             | YES   |
| 45 |      | a'       | 406.47                  | 13.54368               | YES             | YES   |
| 46 |      | a"       | 406.93                  | 0.51164                | YES             | YES   |
| 47 |      | a'       | 410.54                  | 6.36984                | YES             | YES   |
| 48 |      | a"       | 410.75                  | 11.81746               | YES             | YES   |
| 49 |      | a"       | 414.22                  | 0.29505                | YES             | YES   |
| 50 |      | a'       | 415.66                  | 18.85549               | YES             | YES   |
| 51 |      | a'       | 421.21                  | 3.31206                | YES             | YES   |
| 52 |      | a"       | 423.43                  | 2.28290                | YES             | YES   |
| 53 |      | a'       | 426.31                  | 13.44826               | YES             | YES   |
| 54 |      | a"       | 427.99                  | 2.22129                | YES             | YES   |
| 55 |      | a'       | 431.37                  | 12.91427               | YES             | YES   |
| 56 |      | a"       | 440.00                  | 0.32171                | YES             | YES   |
| 57 |      | a'       | 450.32                  | 2.38129                | YES             | YES   |
| 58 |      | a"       | 451.70                  | 3.63590                | YES             | YES   |
| 59 |      | a'       | 452.40                  | 1.56069                | YES             | YES   |
| 60 |      | a"       | 452.84                  | 1.98399                | YES             | YES   |
| 61 |      | a'       | 461.19                  | 2.05016                | YES             | YES   |
| 62 |      | a"       | 467.22                  | 14.79884               | YES             | YES   |

|    |     |         |            |     |     |
|----|-----|---------|------------|-----|-----|
| 63 | a'  | 470.54  | 6.01843    | YES | YES |
| 64 | a'  | 477.09  | 13.17981   | YES | YES |
| 65 | a'  | 514.92  | 70.78085   | YES | YES |
| 66 | a'' | 516.78  | 0.04633    | YES | YES |
| 67 | a'  | 534.96  | 14.76025   | YES | YES |
| 68 | a'' | 539.64  | 38.25460   | YES | YES |
| 69 | a'  | 542.19  | 13.97641   | YES | YES |
| 70 | a'  | 546.48  | 11.82843   | YES | YES |
| 71 | a'' | 550.74  | 19.93350   | YES | YES |
| 72 | a'' | 567.24  | 28.06113   | YES | YES |
| 73 | a'' | 575.78  | 110.93215  | YES | YES |
| 74 | a'  | 576.28  | 266.49017  | YES | YES |
| 75 | a'' | 583.72  | 48.58028   | YES | YES |
| 76 | a'  | 583.85  | 74.85025   | YES | YES |
| 77 | a'  | 594.68  | 52.25314   | YES | YES |
| 78 | a'  | 598.17  | 12.62312   | YES | YES |
| 79 | a'  | 634.66  | 117.39948  | YES | YES |
| 80 | a'' | 811.92  | 16.85133   | YES | YES |
| 81 | a'  | 2096.55 | 109.70101  | YES | YES |
| 82 | a'  | 2106.06 | 233.89288  | YES | YES |
| 83 | a'' | 2107.46 | 6.03749    | YES | YES |
| 84 | a'' | 2111.68 | 7.29919    | YES | YES |
| 85 | a'  | 2112.80 | 358.00531  | YES | YES |
| 86 | a'  | 2127.96 | 501.73344  | YES | YES |
| 87 | a'' | 2128.10 | 18.80426   | YES | YES |
| 88 | a'' | 2133.31 | 307.10137  | YES | YES |
| 89 | a'  | 2148.36 | 1434.55358 | YES | YES |
| 90 | a'  | 2154.87 | 1351.48678 | YES | YES |
| 91 | a'' | 2170.78 | 2102.79688 | YES | YES |
| 92 | a'  | 2181.77 | 975.32180  | YES | YES |
| 93 | a'  | 2210.76 | 162.65827  | YES | YES |

## Ru(CO)<sub>5</sub>

Method: (RI-)B3LYP(D3BJ)/def2-TZVPP

Symmetry: d3h

Cartesian coordinates in Ångström:

|    |           |           |           |
|----|-----------|-----------|-----------|
| Ru | -0.000000 | 0.000000  | 0.000000  |
| C  | 0.000000  | 0.000000  | 1.954669  |
| C  | 0.000000  | 0.000000  | -1.954669 |
| C  | 0.978886  | -1.695482 | 0.000000  |
| C  | 0.978886  | 1.695482  | 0.000000  |
| C  | -1.957771 | 0.000000  | 0.000000  |
| O  | 1.549057  | -2.683045 | 0.000000  |
| O  | 0.000000  | 0.000000  | 3.090017  |
| O  | 0.000000  | 0.000000  | -3.090017 |
| O  | 1.549057  | 2.683045  | 0.000000  |
| O  | -3.098114 | 0.000000  | 0.000000  |

SCF energy GE0OPT = -661.6659126117 H

ZPE = 106.3 kJ/mol

FREEH energy = 139.02 kJ/mol

FREEH entropy = 0.46596 kJ/mol/K

\$vibrational spectrum

| #  | mode | symmetry | wave number<br>cm**(-1) | IR intensity<br>km/mol | selection rules |       |
|----|------|----------|-------------------------|------------------------|-----------------|-------|
| #  |      |          |                         |                        | IR              | RAMAN |
| 1  |      |          | -0.00                   | 0.00000                | -               | -     |
| 2  |      |          | -0.00                   | 0.00000                | -               | -     |
| 3  |      |          | -0.00                   | 0.00000                | -               | -     |
| 4  |      |          | -0.00                   | 0.00000                | -               | -     |
| 5  |      |          | 0.00                    | 0.00000                | -               | -     |
| 6  |      |          | 0.00                    | 0.00000                | -               | -     |
| 7  |      | e'       | 42.98                   | 0.15783                | YES             | YES   |
| 8  |      | e'       | 42.98                   | 0.15783                | YES             | YES   |
| 9  |      | e''      | 84.97                   | 0.00000                | NO              | YES   |
| 10 |      | e''      | 84.97                   | 0.00000                | NO              | YES   |
| 11 |      | a2''     | 87.76                   | 0.69532                | YES             | NO    |
| 12 |      | e'       | 90.19                   | 0.08748                | YES             | YES   |
| 13 |      | e'       | 90.19                   | 0.08748                | YES             | YES   |
| 14 |      | e''      | 332.77                  | 0.00000                | NO              | YES   |
| 15 |      | e''      | 332.77                  | 0.00000                | NO              | YES   |
| 16 |      | a2'      | 338.83                  | 0.00000                | NO              | NO    |
| 17 |      | e'       | 372.41                  | 48.52942               | YES             | YES   |

|    |     |         |            |     |     |
|----|-----|---------|------------|-----|-----|
| 18 | e'  | 372.41  | 48.52942   | YES | YES |
| 19 | a2" | 405.18  | 28.44086   | YES | NO  |
| 20 | a1' | 418.08  | 0.00000    | NO  | YES |
| 21 | e'  | 449.70  | 0.32464    | YES | YES |
| 22 | e'  | 449.70  | 0.32464    | YES | YES |
| 23 | a1' | 451.47  | 0.00000    | NO  | YES |
| 24 | e"  | 509.98  | 0.00000    | NO  | YES |
| 25 | e"  | 509.98  | 0.00000    | NO  | YES |
| 26 | a2" | 541.17  | 112.43898  | YES | NO  |
| 27 | e'  | 616.12  | 113.15155  | YES | YES |
| 28 | e'  | 616.12  | 113.15155  | YES | YES |
| 29 | e'  | 2070.70 | 1305.48032 | YES | YES |
| 30 | e'  | 2070.70 | 1305.48032 | YES | YES |
| 31 | a1' | 2097.55 | 0.00000    | NO  | YES |
| 32 | a2" | 2107.17 | 1460.88685 | YES | NO  |
| 33 | a1' | 2187.76 | 0.00000    | NO  | YES |

\$end

\$raman spectrum

| #  | mode | symmetry | wave number | selection rule | derivative of isotropic polarizability a.u. | derivative of polarizability anisotropy a.u. | raman scattering cross sections bohr**2/sr |
|----|------|----------|-------------|----------------|---------------------------------------------|----------------------------------------------|--------------------------------------------|
| #  |      |          | cm**(-1)    |                |                                             |                                              | T,T II,II                                  |
| 1  |      |          | 0.00        | -              | 0.000000                                    | 0.000000                                     | 0.00000D+00 0.00000D+00                    |
| 2  |      |          | 0.00        | -              | 0.000000                                    | 0.000000                                     | 0.00000D+00 0.00000D+00                    |
| 3  |      |          | 0.00        | -              | 0.000000                                    | 0.000000                                     | 0.00000D+00 0.00000D+00                    |
| 4  |      |          | 0.00        | -              | 0.000000                                    | 0.000000                                     | 0.00000D+00 0.00000D+00                    |
| 5  |      |          | 0.00        | -              | 0.000000                                    | 0.000000                                     | 0.00000D+00 0.00000D+00                    |
| 6  |      |          | 0.00        | -              | 0.000000                                    | 0.000000                                     | 0.00000D+00 0.00000D+00                    |
| 7  | e'   |          | 42.98       | YES            | -0.000000                                   | 0.054761                                     | 0.34018D-13 0.25514D-13                    |
| 8  | e'   |          | 42.98       | YES            | -0.000000                                   | 0.054761                                     | 0.34018D-13 0.25514D-13                    |
| 9  | e"   |          | 84.97       | YES            | 0.000000                                    | 0.087405                                     | 0.23976D-13 0.17982D-13                    |
| 10 | e"   |          | 84.97       | YES            | 0.000000                                    | 0.087405                                     | 0.23976D-13 0.17982D-13                    |
| 11 | a2"  |          | 87.76       | NO             | 0.000000                                    | 0.000000                                     | 0.00000D+00 0.00000D+00                    |
| 12 | e'   |          | 90.19       | YES            | -0.000000                                   | 0.043992                                     | 0.54422D-14 0.40816D-14                    |
| 13 | e'   |          | 90.19       | YES            | -0.000000                                   | 0.043992                                     | 0.54422D-14 0.40816D-14                    |
| 14 | e"   |          | 332.77      | YES            | 0.000000                                    | 0.011880                                     | 0.42732D-16 0.32049D-16                    |
| 15 | e"   |          | 332.77      | YES            | 0.000000                                    | 0.011880                                     | 0.42732D-16 0.32049D-16                    |
| 16 | a2'  |          | 338.83      | NO             | 0.000000                                    | 0.000000                                     | 0.11959D-34 0.89689D-35                    |
| 17 | e'   |          | 372.41      | YES            | -0.000000                                   | 0.024808                                     | 0.15675D-15 0.11756D-15                    |
| 18 | e'   |          | 372.41      | YES            | -0.000000                                   | 0.024808                                     | 0.15675D-15 0.11756D-15                    |
| 19 | a2"  |          | 405.18      | NO             | 0.000000                                    | 0.000000                                     | 0.00000D+00 0.00000D+00                    |
| 20 | a1'  |          | 418.08      | YES            | 0.052936                                    | 0.046134                                     | 0.71987D-14 0.34145D-15                    |
| 21 | e'   |          | 449.70      | YES            | -0.000000                                   | 0.035107                                     | 0.23654D-15 0.17741D-15                    |
| 22 | e'   |          | 449.70      | YES            | -0.000000                                   | 0.035107                                     | 0.23654D-15 0.17741D-15                    |
| 23 | a1'  |          | 451.47      | YES            | 0.054861                                    | 0.058458                                     | 0.71125D-14 0.48903D-15                    |
| 24 | e"   |          | 509.98      | YES            | 0.000000                                    | 0.017682                                     | 0.49879D-16 0.37409D-16                    |
| 25 | e"   |          | 509.98      | YES            | 0.000000                                    | 0.017682                                     | 0.49879D-16 0.37409D-16                    |
| 26 | a2"  |          | 541.17      | NO             | 0.000000                                    | 0.000000                                     | 0.00000D+00 0.00000D+00                    |
| 27 | e'   |          | 616.12      | YES            | 0.000000                                    | 0.007716                                     | 0.72218D-17 0.54163D-17                    |
| 28 | e'   |          | 616.12      | YES            | -0.000000                                   | 0.007716                                     | 0.72218D-17 0.54163D-17                    |
| 29 | e'   |          | 2070.70     | YES            | 0.000000                                    | 0.316402                                     | 0.16619D-14 0.12464D-14                    |
| 30 | e'   |          | 2070.70     | YES            | 0.000000                                    | 0.316402                                     | 0.16619D-14 0.12464D-14                    |
| 31 | a1'  |          | 2097.55     | YES            | 0.034091                                    | 0.465470                                     | 0.37100D-14 0.26242D-14                    |
| 32 | a2"  |          | 2107.17     | NO             | 0.000000                                    | 0.000000                                     | 0.00000D+00 0.00000D+00                    |
| 33 | a1'  |          | 2187.76     | YES            | -0.111721                                   | 0.205014                                     | 0.26878D-14 0.46439D-15                    |

Os(CO)<sub>5</sub>

Method: (RI-)B3LYP(D3BJ)/def2-TZVPP

Symmetry: d3h

Cartesian coordinates in Ångström:

|    |            |            |            |
|----|------------|------------|------------|
| Os | -0.0000000 | 0.0000000  | -0.0000000 |
| C  | 0.0000000  | 0.0000000  | 1.9767761  |
| C  | 0.0000000  | 0.0000000  | -1.9767761 |
| C  | 0.9821736  | -1.7011745 | 0.0000000  |
| C  | 0.9821736  | 1.7011745  | 0.0000000  |
| C  | -1.9643472 | 0.0000000  | 0.0000000  |
| O  | 1.5535885  | -2.6908941 | 0.0000000  |
| O  | 0.0000000  | 0.0000000  | 3.1132914  |
| O  | 0.0000000  | 0.0000000  | -3.1132914 |
| O  | 1.5535885  | 2.6908941  | 0.0000000  |
| O  | -3.1071769 | 0.0000000  | 0.0000000  |

SCF energy GE0OPT = -657.4622115622 H  
 ZPE = 107.2 kJ/mol  
 FREEH energy = 139.41 kJ/mol  
 FREEH entropy = 0.46775 kJ/mol/K

\$vibrational spectrum

| #  | mode | symmetry | wave number<br>cm**(-1) | IR intensity<br>km/mol | selection rules |       |
|----|------|----------|-------------------------|------------------------|-----------------|-------|
| #  |      |          |                         |                        | IR              | RAMAN |
| 1  |      |          | -0.00                   | 0.00000                | -               | -     |
| 2  |      |          | -0.00                   | 0.00000                | -               | -     |
| 3  |      |          | -0.00                   | 0.00000                | -               | -     |
| 4  |      |          | 0.00                    | 0.00000                | -               | -     |
| 5  |      |          | 0.00                    | 0.00000                | -               | -     |
| 6  |      |          | 0.00                    | 0.00000                | -               | -     |
| 7  |      | e'       | 40.29                   | 0.26200                | YES             | YES   |
| 8  |      | e'       | 40.29                   | 0.26200                | YES             | YES   |
| 9  |      | e''      | 87.47                   | 0.00000                | NO              | YES   |
| 10 |      | e''      | 87.47                   | 0.00000                | NO              | YES   |
| 11 |      | a2''     | 88.46                   | 0.41107                | YES             | NO    |
| 12 |      | e'       | 88.66                   | 0.00386                | YES             | YES   |
| 13 |      | e'       | 88.66                   | 0.00386                | YES             | YES   |
| 14 |      | e''      | 354.50                  | 0.00000                | NO              | YES   |
| 15 |      | e''      | 354.50                  | 0.00000                | NO              | YES   |
| 16 |      | a2'      | 371.34                  | 0.00000                | NO              | NO    |
| 17 |      | e'       | 395.98                  | 63.41617               | YES             | YES   |
| 18 |      | e'       | 395.98                  | 63.41617               | YES             | YES   |
| 19 |      | a2''     | 400.89                  | 47.23878               | YES             | NO    |
| 20 |      | e'       | 454.36                  | 0.16832                | YES             | YES   |
| 21 |      | e'       | 454.36                  | 0.16832                | YES             | YES   |
| 22 |      | a1'      | 456.17                  | 0.00000                | NO              | YES   |
| 23 |      | a1'      | 478.15                  | 0.00000                | NO              | YES   |
| 24 |      | e''      | 510.52                  | 0.00000                | NO              | YES   |
| 25 |      | e''      | 510.52                  | 0.00000                | NO              | YES   |
| 26 |      | a2''     | 554.08                  | 97.30998               | YES             | NO    |
| 27 |      | e'       | 605.70                  | 95.81025               | YES             | YES   |
| 28 |      | e'       | 605.70                  | 95.81025               | YES             | YES   |
| 29 |      | e'       | 2059.18                 | 1387.10787             | YES             | YES   |
| 30 |      | e'       | 2059.18                 | 1387.10787             | YES             | YES   |
| 31 |      | a1'      | 2089.42                 | 0.00000                | NO              | YES   |
| 32 |      | a2''     | 2102.11                 | 1546.03946             | YES             | NO    |
| 33 |      | a1'      | 2186.83                 | 0.00000                | NO              | YES   |

\$end

\$raman spectrum

| #  | mode | symmetry | wave number | selection rule | derivative of isotropic polarizability a.u. | derivative of polarizability anisotropy a.u. | raman scattering cross sections bohr**2/sr |             |
|----|------|----------|-------------|----------------|---------------------------------------------|----------------------------------------------|--------------------------------------------|-------------|
| #  |      |          | cm**(-1)    |                |                                             |                                              | T,T                                        | II,II       |
| 1  |      |          | 0.00        | -              | 0.000000                                    | 0.000000                                     | 0.00000D+00                                | 0.00000D+00 |
| 2  |      |          | 0.00        | -              | 0.000000                                    | 0.000000                                     | 0.00000D+00                                | 0.00000D+00 |
| 3  |      |          | 0.00        | -              | 0.000000                                    | 0.000000                                     | 0.00000D+00                                | 0.00000D+00 |
| 4  |      |          | 0.00        | -              | 0.000000                                    | 0.000000                                     | 0.00000D+00                                | 0.00000D+00 |
| 5  |      |          | 0.00        | -              | 0.000000                                    | 0.000000                                     | 0.00000D+00                                | 0.00000D+00 |
| 6  |      |          | 0.00        | -              | 0.000000                                    | 0.000000                                     | 0.00000D+00                                | 0.00000D+00 |
| 7  |      | e'       | 40.29       | YES            | 0.000000                                    | 0.054767                                     | 0.38523D-13                                | 0.28892D-13 |
| 8  |      | e'       | 40.29       | YES            | 0.000000                                    | 0.054767                                     | 0.38523D-13                                | 0.28892D-13 |
| 9  |      | e''      | 87.47       | YES            | 0.000000                                    | 0.089854                                     | 0.24019D-13                                | 0.18014D-13 |
| 10 |      | e''      | 87.47       | YES            | 0.000000                                    | 0.089854                                     | 0.24019D-13                                | 0.18014D-13 |
| 11 |      | a2''     | 88.46       | NO             | 0.000000                                    | 0.000000                                     | 0.00000D+00                                | 0.00000D+00 |
| 12 |      | e'       | 88.66       | YES            | -0.000000                                   | 0.043554                                     | 0.55048D-14                                | 0.41286D-14 |
| 13 |      | e'       | 88.66       | YES            | -0.000000                                   | 0.043554                                     | 0.55048D-14                                | 0.41286D-14 |
| 14 |      | e''      | 354.50      | YES            | 0.000000                                    | 0.000123                                     | 0.41282D-20                                | 0.30961D-20 |
| 15 |      | e''      | 354.50      | YES            | 0.000000                                    | 0.000123                                     | 0.41282D-20                                | 0.30961D-20 |
| 16 |      | a2'      | 371.34      | NO             | 0.000000                                    | 0.000000                                     | 0.17011D-34                                | 0.12759D-34 |
| 17 |      | e'       | 395.98      | YES            | -0.000000                                   | 0.045506                                     | 0.48061D-15                                | 0.36046D-15 |
| 18 |      | e'       | 395.98      | YES            | -0.000000                                   | 0.045506                                     | 0.48061D-15                                | 0.36046D-15 |
| 19 |      | a2''     | 400.89      | NO             | 0.000000                                    | 0.000000                                     | 0.00000D+00                                | 0.00000D+00 |
| 20 |      | e'       | 454.36      | YES            | 0.000000                                    | 0.036956                                     | 0.25813D-15                                | 0.19360D-15 |
| 21 |      | e'       | 454.36      | YES            | -0.000000                                   | 0.036956                                     | 0.25813D-15                                | 0.19360D-15 |
| 22 |      | a1'      | 456.17      | YES            | 0.045020                                    | 0.060166                                     | 0.49647D-14                                | 0.51015D-15 |
| 23 |      | a1'      | 478.15      | YES            | 0.064982                                    | 0.055388                                     | 0.88660D-14                                | 0.40338D-15 |
| 24 |      | e''      | 510.52      | YES            | 0.000000                                    | 0.006979                                     | 0.77590D-17                                | 0.58193D-17 |
| 25 |      | e''      | 510.52      | YES            | 0.000000                                    | 0.006979                                     | 0.77590D-17                                | 0.58193D-17 |
| 26 |      | a2''     | 554.08      | NO             | 0.000000                                    | 0.000000                                     | 0.00000D+00                                | 0.00000D+00 |
| 27 |      | e'       | 605.70      | YES            | -0.000000                                   | 0.007455                                     | 0.69093D-17                                | 0.51820D-17 |
| 28 |      | e'       | 605.70      | YES            | -0.000000                                   | 0.007455                                     | 0.69093D-17                                | 0.51820D-17 |

|    |      |         |     |           |          |             |             |
|----|------|---------|-----|-----------|----------|-------------|-------------|
| 29 | e'   | 2059.18 | YES | -0.000000 | 0.287554 | 0.13890D-14 | 0.10418D-14 |
| 30 | e'   | 2059.18 | YES | -0.000000 | 0.287554 | 0.13890D-14 | 0.10418D-14 |
| 31 | a1'  | 2089.42 | YES | 0.034813  | 0.450214 | 0.35227D-14 | 0.24755D-14 |
| 32 | a2'' | 2102.11 | NO  | 0.000000  | 0.000000 | 0.00000D+00 | 0.00000D+00 |
| 33 | a1'  | 2186.83 | YES | -0.113261 | 0.210224 | 0.27797D-14 | 0.48876D-15 |

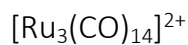

Method: (RI-)B3LYP(D3BJ)/def2-TZVPP

Symmetry: d4h

Cartesian coordinates in Ångström:

|    |            |            |            |
|----|------------|------------|------------|
| Ru | 0.0000000  | 0.0000000  | -2.9715497 |
| Ru | -0.0000000 | 0.0000000  | 0.0000000  |
| O  | 0.0000000  | 0.0000000  | -6.0802738 |
| O  | 2.1926223  | -2.1926223 | -2.7420687 |
| O  | 3.0914122  | 0.0000000  | 0.0000000  |
| O  | -2.1926223 | -2.1926223 | -2.7420687 |
| O  | 2.1926223  | 2.1926223  | -2.7420687 |
| C  | 1.9600803  | -0.0000000 | 0.0000000  |
| O  | -2.1926223 | 2.1926223  | -2.7420687 |
| C  | -0.0000000 | -1.9600803 | 0.0000000  |
| O  | 0.0000000  | -3.0914122 | 0.0000000  |
| C  | 1.3989130  | -1.3989130 | -2.8258967 |
| C  | 0.0000000  | 0.0000000  | -4.9570337 |
| C  | -1.3989130 | 1.3989130  | -2.8258967 |
| C  | -1.3989130 | -1.3989130 | -2.8258967 |
| C  | 1.3989130  | 1.3989130  | -2.8258967 |
| Ru | 0.0000000  | 0.0000000  | 2.9715497  |
| O  | 0.0000000  | 0.0000000  | 6.0802738  |
| O  | -2.1926223 | 2.1926223  | 2.7420687  |
| O  | -3.0914122 | 0.0000000  | 0.0000000  |
| O  | 2.1926223  | 2.1926223  | 2.7420687  |
| O  | -2.1926223 | -2.1926223 | 2.7420687  |
| C  | -1.9600803 | 0.0000000  | 0.0000000  |
| O  | 2.1926223  | -2.1926223 | 2.7420687  |
| C  | 0.0000000  | 1.9600803  | 0.0000000  |
| O  | 0.0000000  | 3.0914122  | 0.0000000  |
| C  | -1.3989130 | 1.3989130  | 2.8258967  |
| C  | 0.0000000  | 0.0000000  | 4.9570337  |
| C  | 1.3989130  | -1.3989130 | 2.8258967  |
| C  | 1.3989130  | 1.3989130  | 2.8258967  |
| C  | -1.3989130 | -1.3989130 | 2.8258967  |

SCF energy GE0OPT = -1871.141115223 H

ZPE = 314.5 kJ/mol

FREEH energy = 413.57 kJ/mol

FREEH entropy = 0.98279 kJ/mol/K

\$vibrational spectrum

| #  | mode | symmetry | wave number<br>cm**(-1) | IR intensity<br>km/mol | selection rules<br>IR | RAMAN |
|----|------|----------|-------------------------|------------------------|-----------------------|-------|
| #  |      |          |                         |                        |                       |       |
| 1  |      |          | -0.00                   | 0.00000                | -                     | -     |
| 2  |      |          | -0.00                   | 0.00000                | -                     | -     |
| 3  |      |          | -0.00                   | 0.00000                | -                     | -     |
| 4  |      |          | 0.00                    | 0.00000                | -                     | -     |
| 5  |      |          | 0.00                    | 0.00000                | -                     | -     |
| 6  |      |          | 0.00                    | 0.00000                | -                     | -     |
| 7  |      | a1u      | 24.17                   | 0.00000                | NO                    | NO    |
| 8  |      | eu       | 34.82                   | 0.09321                | YES                   | NO    |
| 9  |      | eu       | 34.82                   | 0.09321                | YES                   | NO    |
| 10 |      | a2g      | 41.38                   | 0.00000                | NO                    | NO    |
| 11 |      | eg       | 52.27                   | 0.00000                | NO                    | YES   |
| 12 |      | eg       | 52.27                   | 0.00000                | NO                    | YES   |
| 13 |      | eu       | 63.40                   | 0.74643                | YES                   | NO    |
| 14 |      | eu       | 63.40                   | 0.74643                | YES                   | NO    |
| 15 |      | b2u      | 73.81                   | 0.00000                | NO                    | NO    |
| 16 |      | b2g      | 74.65                   | 0.00000                | NO                    | YES   |
| 17 |      | eg       | 75.56                   | 0.00000                | NO                    | YES   |
| 18 |      | eg       | 75.56                   | 0.00000                | NO                    | YES   |
| 19 |      | b1u      | 76.80                   | 0.00000                | NO                    | NO    |
| 20 |      | a1g      | 84.39                   | 0.00000                | NO                    | YES   |
| 21 |      | eu       | 86.72                   | 0.72623                | YES                   | NO    |
| 22 |      | eu       | 86.72                   | 0.72623                | YES                   | NO    |
| 23 |      | eu       | 92.99                   | 0.33714                | YES                   | NO    |



|    |     |         |            |     |     |
|----|-----|---------|------------|-----|-----|
| 24 | eu  | 92.99   | 0.33714    | YES | NO  |
| 25 | eg  | 93.09   | 0.00000    | NO  | YES |
| 26 | eg  | 93.09   | 0.00000    | NO  | YES |
| 27 | b1g | 93.27   | 0.00000    | NO  | YES |
| 28 | b2u | 94.85   | 0.00000    | NO  | NO  |
| 29 | b2g | 95.66   | 0.00000    | NO  | YES |
| 30 | a2u | 97.18   | 1.57554    | YES | NO  |
| 31 | eg  | 99.38   | 0.00000    | NO  | YES |
| 32 | eg  | 99.38   | 0.00000    | NO  | YES |
| 33 | eu  | 100.70  | 0.43283    | YES | NO  |
| 34 | eu  | 100.70  | 0.43283    | YES | NO  |
| 35 | a2u | 106.24  | 6.54365    | YES | NO  |
| 36 | a1g | 142.48  | 0.00000    | NO  | YES |
| 37 | a2u | 174.98  | 0.00139    | YES | NO  |
| 38 | a2g | 350.26  | 0.00000    | NO  | NO  |
| 39 | a1u | 350.41  | 0.00000    | NO  | NO  |
| 40 | a2g | 361.40  | 0.00000    | NO  | NO  |
| 41 | eg  | 361.77  | 0.00000    | NO  | YES |
| 42 | eg  | 361.77  | 0.00000    | NO  | YES |
| 43 | eu  | 362.16  | 18.47424   | YES | NO  |
| 44 | eu  | 362.16  | 18.47424   | YES | NO  |
| 45 | a2u | 380.95  | 5.92914    | YES | NO  |
| 46 | eu  | 381.18  | 45.14729   | YES | NO  |
| 47 | eu  | 381.18  | 45.14729   | YES | NO  |
| 48 | a1g | 382.69  | 0.00000    | NO  | YES |
| 49 | eg  | 384.42  | 0.00000    | NO  | YES |
| 50 | eg  | 384.42  | 0.00000    | NO  | YES |
| 51 | eu  | 386.27  | 18.54243   | YES | NO  |
| 52 | eu  | 386.27  | 18.54243   | YES | NO  |
| 53 | b1u | 411.51  | 0.00000    | NO  | NO  |
| 54 | b2g | 411.91  | 0.00000    | NO  | YES |
| 55 | a2u | 421.61  | 34.43429   | YES | NO  |
| 56 | a1g | 423.80  | 0.00000    | NO  | YES |
| 57 | b1g | 433.18  | 0.00000    | NO  | YES |
| 58 | a1g | 443.54  | 0.00000    | NO  | YES |
| 59 | eg  | 451.33  | 0.00000    | NO  | YES |
| 60 | eg  | 451.33  | 0.00000    | NO  | YES |
| 61 | b2g | 462.95  | 0.00000    | NO  | YES |
| 62 | b1u | 464.23  | 0.00000    | NO  | NO  |
| 63 | b2u | 494.96  | 0.00000    | NO  | NO  |
| 64 | eu  | 495.22  | 22.65124   | YES | NO  |
| 65 | eu  | 495.22  | 22.65124   | YES | NO  |
| 66 | eg  | 499.57  | 0.00000    | NO  | YES |
| 67 | eg  | 499.57  | 0.00000    | NO  | YES |
| 68 | b1g | 501.82  | 0.00000    | NO  | YES |
| 69 | b2u | 502.28  | 0.00000    | NO  | NO  |
| 70 | b2g | 515.85  | 0.00000    | NO  | YES |
| 71 | eg  | 584.69  | 0.00000    | NO  | YES |
| 72 | eg  | 584.69  | 0.00000    | NO  | YES |
| 73 | eu  | 584.84  | 79.91601   | YES | NO  |
| 74 | eu  | 584.84  | 79.91601   | YES | NO  |
| 75 | a2u | 590.27  | 976.09580  | YES | NO  |
| 76 | eu  | 600.44  | 53.28793   | YES | NO  |
| 77 | eu  | 600.44  | 53.28793   | YES | NO  |
| 78 | a1g | 612.41  | 0.00000    | NO  | YES |
| 79 | a2u | 637.13  | 49.91096   | YES | NO  |
| 80 | eu  | 2125.54 | 321.10794  | YES | NO  |
| 81 | eu  | 2125.54 | 321.10794  | YES | NO  |
| 82 | b1g | 2158.01 | 0.00000    | NO  | YES |
| 83 | a1g | 2180.08 | 0.00000    | NO  | YES |
| 84 | eg  | 2180.85 | 0.00000    | NO  | YES |
| 85 | eg  | 2180.85 | 0.00000    | NO  | YES |
| 86 | eu  | 2188.94 | 1884.25428 | YES | NO  |
| 87 | eu  | 2188.94 | 1884.25428 | YES | NO  |
| 88 | b1u | 2201.68 | 0.00000    | NO  | NO  |
| 89 | b2g | 2203.56 | 0.00000    | NO  | YES |
| 90 | a2u | 2206.62 | 234.37572  | YES | NO  |
| 91 | a1g | 2214.13 | 0.00000    | NO  | YES |
| 92 | a2u | 2243.22 | 1342.01810 | YES | NO  |
| 93 | a1g | 2267.28 | 0.00000    | NO  | YES |

\$end  
\$raman spectrum  
# mode symmetry wave selection derivative of derivative of raman  
# number rule isotropic polarizability scattering  
# polarizability anisotropy cross sections  
# cm\*\*(-1) a.u. a.u. bohr\*\*2/sr

#

|    |     |        |     |           | T, T     | II, II      |
|----|-----|--------|-----|-----------|----------|-------------|
| 1  |     | 0.00   | -   | 0.000000  | 0.000000 | 0.00000D+00 |
| 2  |     | 0.00   | -   | 0.000000  | 0.000000 | 0.00000D+00 |
| 3  |     | 0.00   | -   | 0.000000  | 0.000000 | 0.00000D+00 |
| 4  |     | 0.00   | -   | 0.000000  | 0.000000 | 0.00000D+00 |
| 5  |     | 0.00   | -   | 0.000000  | 0.000000 | 0.00000D+00 |
| 6  |     | 0.00   | -   | 0.000000  | 0.000000 | 0.00000D+00 |
| 7  | a1u | 24.17  | NO  | 0.000000  | 0.000000 | 0.00000D+00 |
| 8  | eu  | 34.82  | NO  | 0.000000  | 0.000000 | 0.00000D+00 |
| 9  | eu  | 34.82  | NO  | 0.000000  | 0.000000 | 0.00000D+00 |
| 10 | a2g | 41.38  | NO  | 0.000000  | 0.000000 | 0.00000D+00 |
| 11 | eg  | 52.27  | YES | 0.000000  | 0.053347 | 0.22215D-13 |
| 12 | eg  | 52.27  | YES | 0.000000  | 0.053347 | 0.22215D-13 |
| 13 | eu  | 63.40  | NO  | 0.000000  | 0.000000 | 0.00000D+00 |
| 14 | eu  | 63.40  | NO  | 0.000000  | 0.000000 | 0.00000D+00 |
| 15 | b2u | 73.81  | NO  | 0.000000  | 0.000000 | 0.00000D+00 |
| 16 | b2g | 74.65  | YES | 0.000000  | 0.032620 | 0.42456D-14 |
| 17 | eg  | 75.56  | YES | 0.000000  | 0.087250 | 0.29696D-13 |
| 18 | eg  | 75.56  | YES | 0.000000  | 0.087250 | 0.29696D-13 |
| 19 | b1u | 76.80  | NO  | 0.000000  | 0.000000 | 0.00000D+00 |
| 20 | a1g | 84.39  | YES | 0.050300  | 0.103428 | 0.12446D-12 |
| 21 | eu  | 86.72  | NO  | 0.000000  | 0.000000 | 0.00000D+00 |
| 22 | eu  | 86.72  | NO  | 0.000000  | 0.000000 | 0.00000D+00 |
| 23 | eu  | 92.99  | NO  | 0.000000  | 0.000000 | 0.10404D-32 |
| 24 | eu  | 92.99  | NO  | 0.000000  | 0.000000 | 0.12754D-32 |
| 25 | eg  | 93.09  | YES | 0.000000  | 0.025807 | 0.17672D-14 |
| 26 | eg  | 93.09  | YES | 0.000000  | 0.025807 | 0.17672D-14 |
| 27 | b1g | 93.27  | YES | 0.000000  | 0.091404 | 0.22090D-13 |
| 28 | b2u | 94.85  | NO  | 0.000000  | 0.000000 | 0.00000D+00 |
| 29 | b2g | 95.66  | YES | 0.000000  | 0.052235 | 0.68879D-14 |
| 30 | a2u | 97.18  | NO  | 0.000000  | 0.000000 | 0.00000D+00 |
| 31 | eg  | 99.38  | YES | 0.000000  | 0.044894 | 0.47458D-14 |
| 32 | eg  | 99.38  | YES | 0.000000  | 0.044894 | 0.47458D-14 |
| 33 | eu  | 100.70 | NO  | 0.000000  | 0.000000 | 0.00000D+00 |
| 34 | eu  | 100.70 | NO  | 0.000000  | 0.000000 | 0.00000D+00 |
| 35 | a2u | 106.24 | NO  | 0.000000  | 0.000000 | 0.00000D+00 |
| 36 | a1g | 142.48 | YES | -0.049066 | 0.155997 | 0.63513D-13 |
| 37 | a2u | 174.98 | NO  | 0.000000  | 0.000000 | 0.00000D+00 |
| 38 | a2g | 350.26 | NO  | 0.000000  | 0.000000 | 0.00000D+00 |
| 39 | a1u | 350.41 | NO  | 0.000000  | 0.000000 | 0.00000D+00 |
| 40 | a2g | 361.40 | NO  | 0.000000  | 0.000000 | 0.00000D+00 |
| 41 | eg  | 361.77 | YES | 0.000000  | 0.005394 | 0.77445D-17 |
| 42 | eg  | 361.77 | YES | 0.000000  | 0.005394 | 0.77445D-17 |
| 43 | eu  | 362.16 | NO  | 0.000000  | 0.000000 | 0.00000D+00 |
| 44 | eu  | 362.16 | NO  | 0.000000  | 0.000000 | 0.30370D-35 |
| 45 | a2u | 380.95 | NO  | 0.000000  | 0.000000 | 0.00000D+00 |
| 46 | eu  | 381.18 | NO  | 0.000000  | 0.000000 | 0.00000D+00 |
| 47 | eu  | 381.18 | NO  | 0.000000  | 0.000000 | 0.00000D+00 |
| 48 | a1g | 382.69 | YES | -0.041851 | 0.157110 | 0.10847D-13 |
| 49 | eg  | 384.42 | YES | 0.000000  | 0.049991 | 0.60656D-15 |
| 50 | eg  | 384.42 | YES | 0.000000  | 0.049991 | 0.60656D-15 |
| 51 | eu  | 386.27 | NO  | 0.000000  | 0.000000 | 0.00000D+00 |
| 52 | eu  | 386.27 | NO  | 0.000000  | 0.000000 | 0.00000D+00 |
| 53 | b1u | 411.51 | NO  | 0.000000  | 0.000000 | 0.00000D+00 |
| 54 | b2g | 411.91 | YES | 0.000000  | 0.051442 | 0.57880D-15 |
| 55 | a2u | 421.61 | NO  | 0.000000  | 0.000000 | 0.00000D+00 |
| 56 | a1g | 423.80 | YES | -0.078056 | 0.050425 | 0.14900D-13 |
| 57 | b1g | 433.18 | YES | 0.000000  | 0.051170 | 0.53122D-15 |
| 58 | a1g | 443.54 | YES | 0.088181  | 0.055767 | 0.17744D-13 |
| 59 | eg  | 451.33 | YES | 0.000000  | 0.035091 | 0.23506D-15 |
| 60 | eg  | 451.33 | YES | 0.000000  | 0.035091 | 0.23506D-15 |
| 61 | b2g | 462.95 | YES | 0.000000  | 0.034481 | 0.21859D-15 |
| 62 | b1u | 464.23 | NO  | 0.000000  | 0.000000 | 0.00000D+00 |
| 63 | b2u | 494.96 | NO  | 0.000000  | 0.000000 | 0.00000D+00 |
| 64 | eu  | 495.22 | NO  | 0.000000  | 0.000000 | 0.00000D+00 |
| 65 | eu  | 495.22 | NO  | 0.000000  | 0.000000 | 0.00000D+00 |
| 66 | eg  | 499.57 | YES | 0.000000  | 0.073804 | 0.89554D-15 |
| 67 | eg  | 499.57 | YES | 0.000000  | 0.073804 | 0.89554D-15 |
| 68 | b1g | 501.82 | YES | 0.000000  | 0.006384 | 0.66564D-17 |
| 69 | b2u | 502.28 | NO  | 0.000000  | 0.000000 | 0.00000D+00 |
| 70 | b2g | 515.85 | YES | 0.000000  | 0.008379 | 0.11015D-16 |
| 71 | eg  | 584.69 | YES | 0.000000  | 0.007144 | 0.66772D-17 |
| 72 | eg  | 584.69 | YES | 0.000000  | 0.007144 | 0.66772D-17 |
| 73 | eu  | 584.84 | NO  | 0.000000  | 0.000000 | 0.00000D+00 |
| 74 | eu  | 584.84 | NO  | 0.000000  | 0.000000 | 0.00000D+00 |
| 75 | a2u | 590.27 | NO  | 0.000000  | 0.000000 | 0.00000D+00 |

|    |     |         |     |           |          |             |             |
|----|-----|---------|-----|-----------|----------|-------------|-------------|
| 76 | eu  | 600.44  | NO  | 0.000000  | 0.000000 | 0.00000D+00 | 0.00000D+00 |
| 77 | eu  | 600.44  | NO  | 0.000000  | 0.000000 | 0.00000D+00 | 0.00000D+00 |
| 78 | a1g | 612.41  | YES | -0.042436 | 0.134128 | 0.46807D-14 | 0.16512D-14 |
| 79 | a2u | 637.13  | NO  | 0.000000  | 0.000000 | 0.00000D+00 | 0.00000D+00 |
| 80 | eu  | 2125.54 | NO  | 0.000000  | 0.000000 | 0.00000D+00 | 0.00000D+00 |
| 81 | eu  | 2125.54 | NO  | 0.000000  | 0.000000 | 0.00000D+00 | 0.00000D+00 |
| 82 | b1g | 2158.01 | YES | 0.000000  | 0.352308 | 0.18845D-14 | 0.14134D-14 |
| 83 | a1g | 2180.08 | YES | 0.015981  | 0.046944 | 0.75374D-16 | 0.24539D-16 |
| 84 | eg  | 2180.85 | YES | 0.000000  | 0.294708 | 0.12885D-14 | 0.96636D-15 |
| 85 | eg  | 2180.85 | YES | 0.000000  | 0.294708 | 0.12885D-14 | 0.96636D-15 |
| 86 | eu  | 2188.94 | NO  | 0.000000  | 0.000000 | 0.00000D+00 | 0.00000D+00 |
| 87 | eu  | 2188.94 | NO  | 0.000000  | 0.000000 | 0.00000D+00 | 0.00000D+00 |
| 88 | b1u | 2201.68 | NO  | 0.000000  | 0.000000 | 0.00000D+00 | 0.00000D+00 |
| 89 | b2g | 2203.56 | YES | 0.000000  | 0.556377 | 0.44880D-14 | 0.33660D-14 |
| 90 | a2u | 2206.62 | NO  | 0.000000  | 0.000000 | 0.00000D+00 | 0.00000D+00 |
| 91 | a1g | 2214.13 | YES | 0.138357  | 0.846588 | 0.13370D-13 | 0.77107D-14 |
| 92 | a2u | 2243.22 | NO  | 0.000000  | 0.000000 | 0.00000D+00 | 0.00000D+00 |
| 93 | a1g | 2267.28 | YES | -0.256021 | 0.030899 | 0.10040D-13 | 0.97371D-17 |

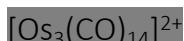

Method: (RI-)B3LYP(D3BJ)/def2-TZVPP

Symmetry: d4h

Cartesian coordinates in Ångström:

|    |            |            |            |
|----|------------|------------|------------|
| Os | 0.0000000  | 0.0000000  | -3.0027593 |
| Os | 0.0000000  | 0.0000000  | 0.0000000  |
| O  | 0.0000000  | 0.0000000  | -6.1131312 |
| O  | 2.2043293  | -2.2043293 | -2.7585071 |
| O  | 3.1088335  | 0.0000000  | 0.0000000  |
| O  | -2.2043293 | -2.2043293 | -2.7585071 |
| O  | 2.2043293  | 2.2043293  | -2.7585071 |
| C  | 1.9753861  | 0.0000000  | 0.0000000  |
| O  | -2.2043293 | 2.2043293  | -2.7585071 |
| C  | -0.0000000 | -1.9753861 | 0.0000000  |
| O  | 0.0000000  | -3.1088335 | 0.0000000  |
| C  | 1.4109064  | -1.4109064 | -2.8596346 |
| C  | 0.0000000  | 0.0000000  | -4.9877032 |
| C  | -1.4109064 | 1.4109064  | -2.8596346 |
| C  | -1.4109064 | -1.4109064 | -2.8596346 |
| C  | 1.4109064  | 1.4109064  | -2.8596346 |
| Os | 0.0000000  | 0.0000000  | 3.0027593  |
| O  | 0.0000000  | 0.0000000  | 6.1131312  |
| O  | -2.2043293 | 2.2043293  | 2.7585071  |
| O  | -3.1088335 | -0.0000000 | 0.0000000  |
| O  | 2.2043293  | 2.2043293  | 2.7585071  |
| O  | -2.2043293 | -2.2043293 | 2.7585071  |
| C  | -1.9753861 | 0.0000000  | 0.0000000  |
| O  | 2.2043293  | -2.2043293 | 2.7585071  |
| C  | -0.0000000 | 1.9753861  | 0.0000000  |
| O  | -0.0000000 | 3.1088335  | 0.0000000  |
| C  | -1.4109064 | 1.4109064  | 2.8596346  |
| C  | 0.0000000  | 0.0000000  | 4.9877032  |
| C  | 1.4109064  | -1.4109064 | 2.8596346  |
| C  | 1.4109064  | 1.4109064  | 2.8596346  |
| C  | -1.4109064 | -1.4109064 | 2.8596346  |

SCF energy GE0OPT = -1858.544241910 H

ZPE = 316.7 kJ/mol

FREEH energy = 414.93 kJ/mol

FREEH entropy = 0.98946 kJ/mol/K

\$vibrational spectrum

| #  | mode | symmetry | wave number<br>cm**(-1) | IR intensity<br>km/mol | selection rules<br>IR | RAMAN |
|----|------|----------|-------------------------|------------------------|-----------------------|-------|
| 1  |      |          | -0.00                   | 0.00000                | -                     | -     |
| 2  |      |          | -0.00                   | 0.00000                | -                     | -     |
| 3  |      |          | -0.00                   | 0.00000                | -                     | -     |
| 4  |      |          | -0.00                   | 0.00000                | -                     | -     |
| 5  |      |          | 0.00                    | 0.00000                | -                     | -     |
| 6  |      |          | 0.00                    | 0.00000                | -                     | -     |
| 7  |      | a1u      | 22.85                   | 0.00000                | NO                    | NO    |
| 8  |      | eu       | 32.54                   | 0.16002                | YES                   | NO    |
| 9  |      | eu       | 32.54                   | 0.16002                | YES                   | NO    |
| 10 |      | a2g      | 38.88                   | 0.00000                | NO                    | NO    |

|    |     |         |            |     |     |
|----|-----|---------|------------|-----|-----|
| 11 | eg  | 52.12   | 0.00000    | NO  | YES |
| 12 | eg  | 52.12   | 0.00000    | NO  | YES |
| 13 | eu  | 60.50   | 0.66426    | YES | NO  |
| 14 | eu  | 60.50   | 0.66426    | YES | NO  |
| 15 | b2u | 69.86   | 0.00000    | NO  | NO  |
| 16 | b2g | 75.03   | 0.00000    | NO  | YES |
| 17 | b1u | 76.36   | 0.00000    | NO  | NO  |
| 18 | eg  | 76.62   | 0.00000    | NO  | YES |
| 19 | eg  | 76.62   | 0.00000    | NO  | YES |
| 20 | a1g | 81.27   | 0.00000    | NO  | YES |
| 21 | eu  | 87.83   | 0.61080    | YES | NO  |
| 22 | eu  | 87.83   | 0.61080    | YES | NO  |
| 23 | eu  | 90.43   | 0.02519    | YES | NO  |
| 24 | eu  | 90.43   | 0.02519    | YES | NO  |
| 25 | eg  | 91.60   | 0.00000    | NO  | YES |
| 26 | eg  | 91.60   | 0.00000    | NO  | YES |
| 27 | a2u | 92.05   | 4.25784    | YES | NO  |
| 28 | b1g | 94.99   | 0.00000    | NO  | YES |
| 29 | b2u | 95.78   | 0.00000    | NO  | NO  |
| 30 | b2g | 96.46   | 0.00000    | NO  | YES |
| 31 | eg  | 98.20   | 0.00000    | NO  | YES |
| 32 | eg  | 98.20   | 0.00000    | NO  | YES |
| 33 | eu  | 98.74   | 0.01475    | YES | NO  |
| 34 | eu  | 98.74   | 0.01475    | YES | NO  |
| 35 | a2u | 101.18  | 4.83092    | YES | NO  |
| 36 | a1g | 119.68  | 0.00000    | NO  | YES |
| 37 | a2u | 141.46  | 0.06955    | YES | NO  |
| 38 | eu  | 363.54  | 39.40685   | YES | NO  |
| 39 | eu  | 363.54  | 39.40685   | YES | NO  |
| 40 | eg  | 363.87  | 0.00000    | NO  | YES |
| 41 | eg  | 363.87  | 0.00000    | NO  | YES |
| 42 | a2g | 365.67  | 0.00000    | NO  | NO  |
| 43 | a1u | 365.97  | 0.00000    | NO  | NO  |
| 44 | a2g | 377.40  | 0.00000    | NO  | NO  |
| 45 | eu  | 379.80  | 66.40964   | YES | NO  |
| 46 | eu  | 379.80  | 66.40964   | YES | NO  |
| 47 | eg  | 404.00  | 0.00000    | NO  | YES |
| 48 | eg  | 404.00  | 0.00000    | NO  | YES |
| 49 | a1g | 405.19  | 0.00000    | NO  | YES |
| 50 | a2u | 405.26  | 23.16852   | YES | NO  |
| 51 | eu  | 405.47  | 6.06237    | YES | NO  |
| 52 | eu  | 405.47  | 6.06237    | YES | NO  |
| 53 | b1u | 439.06  | 0.00000    | NO  | NO  |
| 54 | b2g | 439.42  | 0.00000    | NO  | YES |
| 55 | a2u | 453.37  | 27.31657   | YES | NO  |
| 56 | a1g | 455.09  | 0.00000    | NO  | YES |
| 57 | b1g | 463.17  | 0.00000    | NO  | YES |
| 58 | eg  | 467.79  | 0.00000    | NO  | YES |
| 59 | eg  | 467.79  | 0.00000    | NO  | YES |
| 60 | a1g | 475.75  | 0.00000    | NO  | YES |
| 61 | b2g | 495.92  | 0.00000    | NO  | YES |
| 62 | b1u | 497.18  | 0.00000    | NO  | NO  |
| 63 | b2u | 503.45  | 0.00000    | NO  | NO  |
| 64 | b1g | 503.99  | 0.00000    | NO  | YES |
| 65 | eu  | 508.95  | 25.51592   | YES | NO  |
| 66 | eu  | 508.95  | 25.51592   | YES | NO  |
| 67 | eg  | 512.58  | 0.00000    | NO  | YES |
| 68 | eg  | 512.58  | 0.00000    | NO  | YES |
| 69 | b2g | 517.18  | 0.00000    | NO  | YES |
| 70 | b2u | 534.62  | 0.00000    | NO  | NO  |
| 71 | a2u | 588.51  | 755.11874  | YES | NO  |
| 72 | eg  | 588.51  | 0.00000    | NO  | YES |
| 73 | eg  | 588.51  | 0.00000    | NO  | YES |
| 74 | eu  | 588.64  | 71.07035   | YES | NO  |
| 75 | eu  | 588.64  | 71.07035   | YES | NO  |
| 76 | eu  | 603.43  | 32.39831   | YES | NO  |
| 77 | eu  | 603.43  | 32.39831   | YES | NO  |
| 78 | a1g | 604.75  | 0.00000    | NO  | YES |
| 79 | a2u | 640.51  | 78.48412   | YES | NO  |
| 80 | eu  | 2109.78 | 379.33325  | YES | NO  |
| 81 | eu  | 2109.78 | 379.33325  | YES | NO  |
| 82 | b1g | 2149.10 | 0.00000    | NO  | YES |
| 83 | eg  | 2173.31 | 0.00000    | NO  | YES |
| 84 | eg  | 2173.31 | 0.00000    | NO  | YES |
| 85 | a1g | 2175.94 | 0.00000    | NO  | YES |
| 86 | eu  | 2181.76 | 2059.94565 | YES | NO  |

|    |     |         |            |     |     |
|----|-----|---------|------------|-----|-----|
| 87 | eu  | 2181.76 | 2059.94565 | YES | NO  |
| 88 | a2u | 2194.09 | 579.80876  | YES | NO  |
| 89 | b1u | 2198.16 | 0.00000    | NO  | NO  |
| 90 | b2g | 2200.21 | 0.00000    | NO  | YES |
| 91 | a1g | 2201.21 | 0.00000    | NO  | YES |
| 92 | a2u | 2243.54 | 1143.27589 | YES | NO  |
| 93 | a1g | 2267.89 | 0.00000    | NO  | YES |

\$end

\$raman spectrum

| #  | mode | symmetry | wave number | selection rule | derivative of isotropic polarizability a.u. | derivative of polarizability anisotropy a.u. | raman scattering cross sections bohr**2/sr |
|----|------|----------|-------------|----------------|---------------------------------------------|----------------------------------------------|--------------------------------------------|
| #  |      |          | cm**(-1)    |                |                                             |                                              | T,T II,II                                  |
| 1  |      |          | 0.00        | -              | 0.000000                                    | 0.000000                                     | 0.00000D+00 0.00000D+00                    |
| 2  |      |          | 0.00        | -              | 0.000000                                    | 0.000000                                     | 0.00000D+00 0.00000D+00                    |
| 3  |      |          | 0.00        | -              | 0.000000                                    | 0.000000                                     | 0.00000D+00 0.00000D+00                    |
| 4  |      |          | 0.00        | -              | 0.000000                                    | 0.000000                                     | 0.00000D+00 0.00000D+00                    |
| 5  |      |          | 0.00        | -              | 0.000000                                    | 0.000000                                     | 0.00000D+00 0.00000D+00                    |
| 6  |      |          | 0.00        | -              | 0.000000                                    | 0.000000                                     | 0.00000D+00 0.00000D+00                    |
| 7  | a1u  | 22.85    | NO          |                | 0.000000                                    | 0.000000                                     | 0.00000D+00 0.00000D+00                    |
| 8  | eu   | 32.54    | NO          |                | 0.000000                                    | 0.000000                                     | 0.00000D+00 0.00000D+00                    |
| 9  | eu   | 32.54    | NO          |                | 0.000000                                    | 0.000000                                     | 0.00000D+00 0.00000D+00                    |
| 10 | a2g  | 38.88    | NO          |                | 0.000000                                    | 0.000000                                     | 0.00000D+00 0.00000D+00                    |
| 11 | eg   | 52.12    | YES         |                | 0.000000                                    | 0.043460                                     | 0.14825D-13 0.11119D-13                    |
| 12 | eg   | 52.12    | YES         |                | 0.000000                                    | 0.043460                                     | 0.14825D-13 0.11119D-13                    |
| 13 | eu   | 60.50    | NO          |                | 0.000000                                    | 0.000000                                     | 0.00000D+00 0.00000D+00                    |
| 14 | eu   | 60.50    | NO          |                | 0.000000                                    | 0.000000                                     | 0.00000D+00 0.00000D+00                    |
| 15 | b2u  | 69.86    | NO          |                | 0.000000                                    | 0.000000                                     | 0.00000D+00 0.00000D+00                    |
| 16 | b2g  | 75.03    | YES         |                | -0.000000                                   | 0.032532                                     | 0.41830D-14 0.31373D-14                    |
| 17 | b1u  | 76.36    | NO          |                | 0.000000                                    | 0.000000                                     | 0.00000D+00 0.00000D+00                    |
| 18 | eg   | 76.62    | YES         |                | 0.000000                                    | 0.079543                                     | 0.24050D-13 0.18037D-13                    |
| 19 | eg   | 76.62    | YES         |                | 0.000000                                    | 0.079543                                     | 0.24050D-13 0.18037D-13                    |
| 20 | a1g  | 81.27    | YES         |                | -0.045130                                   | 0.089429                                     | 0.10533D-12 0.20439D-13                    |
| 21 | eu   | 87.83    | NO          |                | 0.000000                                    | 0.000000                                     | 0.00000D+00 0.00000D+00                    |
| 22 | eu   | 87.83    | NO          |                | 0.000000                                    | 0.000000                                     | 0.00000D+00 0.00000D+00                    |
| 23 | eu   | 90.43    | NO          |                | 0.000000                                    | 0.000000                                     | 0.00000D+00 0.00000D+00                    |
| 24 | eu   | 90.43    | NO          |                | 0.000000                                    | 0.000000                                     | 0.00000D+00 0.00000D+00                    |
| 25 | eg   | 91.60    | YES         |                | 0.000000                                    | 0.022901                                     | 0.14334D-14 0.10751D-14                    |
| 26 | eg   | 91.60    | YES         |                | 0.000000                                    | 0.022901                                     | 0.14334D-14 0.10751D-14                    |
| 27 | a2u  | 92.05    | NO          |                | 0.000000                                    | 0.000000                                     | 0.00000D+00 0.00000D+00                    |
| 28 | b1g  | 94.99    | YES         |                | 0.000000                                    | 0.093640                                     | 0.22422D-13 0.16816D-13                    |
| 29 | b2u  | 95.78    | NO          |                | 0.000000                                    | 0.000000                                     | 0.00000D+00 0.00000D+00                    |
| 30 | b2g  | 96.46    | YES         |                | 0.000000                                    | 0.055177                                     | 0.75696D-14 0.56772D-14                    |
| 31 | eg   | 98.20    | YES         |                | 0.000000                                    | 0.062444                                     | 0.93833D-14 0.70375D-14                    |
| 32 | eg   | 98.20    | YES         |                | 0.000000                                    | 0.062444                                     | 0.93833D-14 0.70375D-14                    |
| 33 | eu   | 98.74    | NO          |                | 0.000000                                    | 0.000000                                     | 0.00000D+00 0.00000D+00                    |
| 34 | eu   | 98.74    | NO          |                | 0.000000                                    | 0.000000                                     | 0.11410D-35 0.85575D-36                    |
| 35 | a2u  | 101.18   | NO          |                | 0.000000                                    | 0.000000                                     | 0.00000D+00 0.00000D+00                    |
| 36 | a1g  | 119.68   | YES         |                | 0.023588                                    | 0.092184                                     | 0.24837D-13 0.10727D-13                    |
| 37 | a2u  | 141.46   | NO          |                | 0.000000                                    | 0.000000                                     | 0.00000D+00 0.00000D+00                    |
| 38 | eu   | 363.54   | NO          |                | 0.000000                                    | 0.000000                                     | 0.13395D-33 0.89409D-34                    |
| 39 | eu   | 363.54   | NO          |                | 0.000000                                    | 0.000000                                     | 0.00000D+00 0.00000D+00                    |
| 40 | eg   | 363.87   | YES         |                | 0.000000                                    | 0.061417                                     | 0.99533D-15 0.74649D-15                    |
| 41 | eg   | 363.87   | YES         |                | 0.000000                                    | 0.061417                                     | 0.99533D-15 0.74649D-15                    |
| 42 | a2g  | 365.67   | NO          |                | 0.000000                                    | 0.000000                                     | 0.00000D+00 0.00000D+00                    |
| 43 | a1u  | 365.97   | NO          |                | 0.000000                                    | 0.000000                                     | 0.00000D+00 0.00000D+00                    |
| 44 | a2g  | 377.40   | NO          |                | 0.000000                                    | 0.000000                                     | 0.00000D+00 0.00000D+00                    |
| 45 | eu   | 379.80   | NO          |                | 0.000000                                    | 0.000000                                     | 0.00000D+00 0.00000D+00                    |
| 46 | eu   | 379.80   | NO          |                | 0.000000                                    | 0.000000                                     | 0.00000D+00 0.00000D+00                    |
| 47 | eg   | 404.00   | YES         |                | 0.000000                                    | 0.032800                                     | 0.24226D-15 0.18170D-15                    |
| 48 | eg   | 404.00   | YES         |                | 0.000000                                    | 0.032800                                     | 0.24226D-15 0.18170D-15                    |
| 49 | a1g  | 405.19   | YES         |                | -0.030404                                   | 0.117962                                     | 0.54511D-14 0.23397D-14                    |
| 50 | a2u  | 405.26   | NO          |                | 0.000000                                    | 0.000000                                     | 0.00000D+00 0.00000D+00                    |
| 51 | eu   | 405.47   | NO          |                | 0.000000                                    | 0.000000                                     | 0.00000D+00 0.00000D+00                    |
| 52 | eu   | 405.47   | NO          |                | 0.000000                                    | 0.000000                                     | 0.00000D+00 0.00000D+00                    |
| 53 | b1u  | 439.06   | NO          |                | 0.000000                                    | 0.000000                                     | 0.00000D+00 0.00000D+00                    |
| 54 | b2g  | 439.42   | YES         |                | 0.000000                                    | 0.055332                                     | 0.60808D-15 0.45606D-15                    |
| 55 | a2u  | 453.37   | NO          |                | 0.000000                                    | 0.000000                                     | 0.00000D+00 0.00000D+00                    |
| 56 | a1g  | 455.09   | YES         |                | 0.072786                                    | 0.015093                                     | 0.11281D-13 0.32214D-16                    |
| 57 | b1g  | 463.17   | YES         |                | 0.000000                                    | 0.056798                                     | 0.59270D-15 0.44452D-15                    |
| 58 | eg   | 467.79   | YES         |                | 0.000000                                    | 0.031314                                     | 0.17753D-15 0.13315D-15                    |
| 59 | eg   | 467.79   | YES         |                | 0.000000                                    | 0.031314                                     | 0.17753D-15 0.13315D-15                    |
| 60 | a1g  | 475.75   | YES         |                | -0.079484                                   | 0.027053                                     | 0.12682D-13 0.96944D-16                    |
| 61 | b2g  | 495.92   | YES         |                | 0.000000                                    | 0.026939                                     | 0.12060D-15 0.90447D-16                    |
| 62 | b1u  | 497.18   | NO          |                | 0.000000                                    | 0.000000                                     | 0.00000D+00 0.00000D+00                    |

|    |     |         |     |           |          |             |             |
|----|-----|---------|-----|-----------|----------|-------------|-------------|
| 63 | b2u | 503.45  | NO  | 0.000000  | 0.000000 | 0.00000D+00 | 0.00000D+00 |
| 64 | b1g | 503.99  | YES | 0.000000  | 0.004983 | 0.40298D-17 | 0.30224D-17 |
| 65 | eu  | 508.95  | NO  | 0.000000  | 0.000000 | 0.00000D+00 | 0.00000D+00 |
| 66 | eu  | 508.95  | NO  | 0.000000  | 0.000000 | 0.00000D+00 | 0.00000D+00 |
| 67 | eg  | 512.58  | YES | 0.000000  | 0.086688 | 0.11900D-14 | 0.89248D-15 |
| 68 | eg  | 512.58  | YES | 0.000000  | 0.086688 | 0.11900D-14 | 0.89248D-15 |
| 69 | b2g | 517.18  | YES | 0.000000  | 0.008433 | 0.11115D-16 | 0.83361D-17 |
| 70 | b2u | 534.62  | NO  | 0.000000  | 0.000000 | 0.00000D+00 | 0.00000D+00 |
| 71 | a2u | 588.51  | NO  | 0.000000  | 0.000000 | 0.00000D+00 | 0.00000D+00 |
| 72 | eg  | 588.51  | YES | 0.000000  | 0.002702 | 0.94619D-18 | 0.70964D-18 |
| 73 | eg  | 588.51  | YES | 0.000000  | 0.002702 | 0.94619D-18 | 0.70964D-18 |
| 74 | eu  | 588.64  | NO  | 0.000000  | 0.000000 | 0.00000D+00 | 0.00000D+00 |
| 75 | eu  | 588.64  | NO  | 0.000000  | 0.000000 | 0.00000D+00 | 0.00000D+00 |
| 76 | eu  | 603.43  | NO  | 0.000000  | 0.000000 | 0.00000D+00 | 0.00000D+00 |
| 77 | eu  | 603.43  | NO  | 0.000000  | 0.000000 | 0.00000D+00 | 0.00000D+00 |
| 78 | a1g | 604.75  | YES | 0.021175  | 0.073989 | 0.13108D-14 | 0.51164D-15 |
| 79 | a2u | 640.51  | NO  | 0.000000  | 0.000000 | 0.00000D+00 | 0.00000D+00 |
| 80 | eu  | 2109.78 | NO  | 0.000000  | 0.000000 | 0.00000D+00 | 0.00000D+00 |
| 81 | eu  | 2109.78 | NO  | 0.000000  | 0.000000 | 0.00000D+00 | 0.00000D+00 |
| 82 | b1g | 2149.10 | YES | 0.000000  | 0.351011 | 0.18877D-14 | 0.14158D-14 |
| 83 | eg  | 2173.31 | YES | 0.000000  | 0.198875 | 0.59125D-15 | 0.44344D-15 |
| 84 | eg  | 2173.31 | YES | 0.000000  | 0.198875 | 0.59125D-15 | 0.44344D-15 |
| 85 | a1g | 2175.94 | YES | 0.007062  | 0.056541 | 0.56028D-16 | 0.35747D-16 |
| 86 | eu  | 2181.76 | NO  | 0.000000  | 0.000000 | 0.00000D+00 | 0.00000D+00 |
| 87 | eu  | 2181.76 | NO  | 0.000000  | 0.000000 | 0.00000D+00 | 0.00000D+00 |
| 88 | a2u | 2194.09 | NO  | 0.000000  | 0.000000 | 0.00000D+00 | 0.00000D+00 |
| 89 | b1u | 2198.16 | NO  | 0.000000  | 0.000000 | 0.00000D+00 | 0.00000D+00 |
| 90 | b2g | 2200.21 | YES | 0.000000  | 0.562591 | 0.46044D-14 | 0.34533D-14 |
| 91 | a1g | 2201.21 | YES | 0.131753  | 0.827957 | 0.12801D-13 | 0.74718D-14 |
| 92 | a2u | 2243.54 | NO  | 0.000000  | 0.000000 | 0.00000D+00 | 0.00000D+00 |
| 93 | a1g | 2267.89 | YES | -0.275461 | 0.076347 | 0.11680D-13 | 0.59410D-16 |

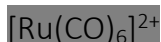

Method: (RI-)B3LYP(D3BJ)/def2-TZVPP

Symmetry: oh

Cartesian coordinates in Ångström:

|    |           |           |           |
|----|-----------|-----------|-----------|
| Ru | -0.000000 | -0.000000 | 0.000000  |
| C  | -0.000000 | 2.036887  | -0.000000 |
| C  | 0.000000  | -2.036887 | 0.000000  |
| C  | -0.000000 | 0.000000  | 2.036887  |
| C  | 2.036887  | 0.000000  | 0.000000  |
| C  | 0.000000  | -0.000000 | -2.036887 |
| O  | 0.000000  | 0.000000  | 3.152064  |
| O  | -0.000000 | 3.152064  | 0.000000  |
| O  | 0.000000  | -3.152064 | -0.000000 |
| O  | 3.152064  | 0.000000  | -0.000000 |
| O  | -0.000000 | -0.000000 | -3.152064 |
| C  | -2.036887 | -0.000000 | 0.000000  |
| O  | -3.152064 | -0.000000 | 0.000000  |

SCF energy GE00PT = -774.3069275394 H

ZPE = 133.6 kJ/mol

FREEH energy = 172.53 kJ/mol

FREEH entropy = 0.49054 kJ/mol/K

\$vibrational spectrum

| #  | mode | symmetry | wave number<br>cm**(-1) | IR intensity<br>km/mol | selection rules<br>IR | RAMAN |
|----|------|----------|-------------------------|------------------------|-----------------------|-------|
| 1  |      |          | -0.00                   | 0.00000                | -                     | -     |
| 2  |      |          | 0.00                    | 0.00000                | -                     | -     |
| 3  |      |          | 0.00                    | 0.00000                | -                     | -     |
| 4  |      |          | 0.00                    | 0.00000                | -                     | -     |
| 5  |      |          | 0.00                    | 0.00000                | -                     | -     |
| 6  |      |          | 0.00                    | 0.00000                | -                     | -     |
| 7  |      | t2u      | 77.68                   | 0.00000                | NO                    | NO    |
| 8  |      | t2u      | 77.68                   | 0.00000                | NO                    | NO    |
| 9  |      | t2u      | 77.68                   | 0.00000                | NO                    | NO    |
| 10 |      | t2g      | 91.72                   | 0.00000                | NO                    | YES   |
| 11 |      | t2g      | 91.72                   | 0.00000                | NO                    | YES   |
| 12 |      | t2g      | 91.72                   | 0.00000                | NO                    | YES   |
| 13 |      | t1u      | 106.89                  | 0.54598                | YES                   | NO    |
| 14 |      | t1u      | 106.89                  | 0.54598                | YES                   | NO    |
| 15 |      | t1u      | 106.89                  | 0.54598                | YES                   | NO    |

|    |     |         |           |     |     |
|----|-----|---------|-----------|-----|-----|
| 16 | t1u | 320.71  | 15.29841  | YES | NO  |
| 17 | t1u | 320.71  | 15.29841  | YES | NO  |
| 18 | t1u | 320.71  | 15.29841  | YES | NO  |
| 19 | t1g | 333.02  | 0.00000   | NO  | NO  |
| 20 | t1g | 333.02  | 0.00000   | NO  | NO  |
| 21 | t1g | 333.02  | 0.00000   | NO  | NO  |
| 22 | eg  | 366.03  | 0.00000   | NO  | YES |
| 23 | eg  | 366.03  | 0.00000   | NO  | YES |
| 24 | a1g | 386.73  | 0.00000   | NO  | YES |
| 25 | t2g | 475.48  | 0.00000   | NO  | YES |
| 26 | t2g | 475.48  | 0.00000   | NO  | YES |
| 27 | t2g | 475.48  | 0.00000   | NO  | YES |
| 28 | t2u | 499.53  | 0.00000   | NO  | NO  |
| 29 | t2u | 499.53  | 0.00000   | NO  | NO  |
| 30 | t2u | 499.53  | 0.00000   | NO  | NO  |
| 31 | t1u | 577.27  | 90.74924  | YES | NO  |
| 32 | t1u | 577.27  | 90.74924  | YES | NO  |
| 33 | t1u | 577.27  | 90.74924  | YES | NO  |
| 34 | t1u | 2278.85 | 435.64559 | YES | NO  |
| 35 | t1u | 2278.85 | 435.64559 | YES | NO  |
| 36 | t1u | 2278.85 | 435.64559 | YES | NO  |
| 37 | eg  | 2296.85 | 0.00000   | NO  | YES |
| 38 | eg  | 2296.85 | 0.00000   | NO  | YES |
| 39 | a1g | 2334.79 | 0.00000   | NO  | YES |

\$end

\$raman spectrum

| #  | mode | symmetry | wave number | selection rule | derivative of isotropic polarizability a.u. | derivative of polarizability anisotropy a.u. | raman scattering cross sections bohr**2/sr |
|----|------|----------|-------------|----------------|---------------------------------------------|----------------------------------------------|--------------------------------------------|
| #  |      |          | cm**(-1)    |                |                                             |                                              | T,T II,II                                  |
| 1  |      |          | 0.00        | -              | 0.000000                                    | 0.000000                                     | 0.00000D+00 0.00000D+00                    |
| 2  |      |          | 0.00        | -              | 0.000000                                    | 0.000000                                     | 0.00000D+00 0.00000D+00                    |
| 3  |      |          | 0.00        | -              | 0.000000                                    | 0.000000                                     | 0.00000D+00 0.00000D+00                    |
| 4  |      |          | 0.00        | -              | 0.000000                                    | 0.000000                                     | 0.00000D+00 0.00000D+00                    |
| 5  |      |          | 0.00        | -              | 0.000000                                    | 0.000000                                     | 0.00000D+00 0.00000D+00                    |
| 6  |      |          | 0.00        | -              | 0.000000                                    | 0.000000                                     | 0.00000D+00 0.00000D+00                    |
| 7  | t2u  |          | 77.68       | NO             | 0.000000                                    | 0.000000                                     | 0.00000D+00 0.00000D+00                    |
| 8  | t2u  |          | 77.68       | NO             | 0.000000                                    | 0.000000                                     | 0.55182D-34 0.41386D-34                    |
| 9  | t2u  |          | 77.68       | NO             | 0.000000                                    | 0.000000                                     | 0.00000D+00 0.00000D+00                    |
| 10 | t2g  |          | 91.72       | YES            | 0.000000                                    | 0.075735                                     | 0.15639D-13 0.11729D-13                    |
| 11 | t2g  |          | 91.72       | YES            | 0.000000                                    | 0.075735                                     | 0.15639D-13 0.11729D-13                    |
| 12 | t2g  |          | 91.72       | YES            | 0.000000                                    | 0.075735                                     | 0.15639D-13 0.11729D-13                    |
| 13 | t1u  |          | 106.89      | NO             | 0.000000                                    | 0.000000                                     | 0.00000D+00 0.00000D+00                    |
| 14 | t1u  |          | 106.89      | NO             | 0.000000                                    | 0.000000                                     | 0.00000D+00 0.00000D+00                    |
| 15 | t1u  |          | 106.89      | NO             | 0.000000                                    | 0.000000                                     | 0.00000D+00 0.00000D+00                    |
| 16 | t1u  |          | 320.71      | NO             | 0.000000                                    | 0.000000                                     | 0.00000D+00 0.00000D+00                    |
| 17 | t1u  |          | 320.71      | NO             | 0.000000                                    | 0.000000                                     | 0.00000D+00 0.00000D+00                    |
| 18 | t1u  |          | 320.71      | NO             | 0.000000                                    | 0.000000                                     | 0.00000D+00 0.00000D+00                    |
| 19 | t1g  |          | 333.02      | NO             | 0.000000                                    | 0.000000                                     | 0.00000D+00 0.00000D+00                    |
| 20 | t1g  |          | 333.02      | NO             | 0.000000                                    | 0.000000                                     | 0.00000D+00 0.00000D+00                    |
| 21 | t1g  |          | 333.02      | NO             | 0.000000                                    | 0.000000                                     | 0.00000D+00 0.00000D+00                    |
| 22 | eg   |          | 366.03      | YES            | 0.000000                                    | 0.004914                                     | 0.63139D-17 0.47354D-17                    |
| 23 | eg   |          | 366.03      | YES            | 0.000000                                    | 0.004914                                     | 0.63139D-17 0.47354D-17                    |
| 24 | a1g  |          | 386.73      | YES            | 0.038822                                    | 0.000000                                     | 0.40782D-14 0.00000D+00                    |
| 25 | t2g  |          | 475.48      | YES            | 0.000000                                    | 0.012299                                     | 0.26739D-16 0.20054D-16                    |
| 26 | t2g  |          | 475.48      | YES            | 0.000000                                    | 0.012299                                     | 0.26739D-16 0.20054D-16                    |
| 27 | t2g  |          | 475.48      | YES            | 0.000000                                    | 0.012299                                     | 0.26739D-16 0.20054D-16                    |
| 28 | t2u  |          | 499.53      | NO             | 0.000000                                    | 0.000000                                     | 0.00000D+00 0.00000D+00                    |
| 29 | t2u  |          | 499.53      | NO             | 0.000000                                    | 0.000000                                     | 0.00000D+00 0.00000D+00                    |
| 30 | t2u  |          | 499.53      | NO             | 0.000000                                    | 0.000000                                     | 0.00000D+00 0.00000D+00                    |
| 31 | t1u  |          | 577.27      | NO             | 0.000000                                    | 0.000000                                     | 0.00000D+00 0.00000D+00                    |
| 32 | t1u  |          | 577.27      | NO             | 0.000000                                    | 0.000000                                     | 0.00000D+00 0.00000D+00                    |
| 33 | t1u  |          | 577.27      | NO             | 0.000000                                    | 0.000000                                     | 0.00000D+00 0.00000D+00                    |
| 34 | t1u  |          | 2278.85     | NO             | 0.000000                                    | 0.000000                                     | 0.00000D+00 0.00000D+00                    |
| 35 | t1u  |          | 2278.85     | NO             | 0.000000                                    | 0.000000                                     | 0.00000D+00 0.00000D+00                    |
| 36 | t1u  |          | 2278.85     | NO             | 0.000000                                    | 0.000000                                     | 0.00000D+00 0.00000D+00                    |
| 37 | eg   |          | 2296.85     | YES            | -0.000000                                   | 0.461391                                     | 0.28104D-14 0.21078D-14                    |
| 38 | eg   |          | 2296.85     | YES            | 0.000000                                    | 0.461391                                     | 0.28104D-14 0.21078D-14                    |
| 39 | a1g  |          | 2334.79     | YES            | -0.184766                                   | 0.000000                                     | 0.48821D-14 0.19847D-30                    |

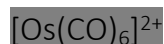

Method: (RI-)B3LYP(D3BJ)/def2-TZVPP

Symmetry: oh

Cartesian coordinates in Ångström:

```

Os  0.0000000  0.0000000  0.0000000
C   0.0000000  2.0487891 -0.0000000
C  -0.0000000 -2.0487891  0.0000000
C  -0.0000000 -0.0000000  2.0487891
C   2.0487891 -0.0000000  0.0000000
C  -0.0000000  0.0000000 -2.0487891
O   0.0000000 -0.0000000  3.1650797
O   0.0000000  3.1650797  0.0000000
O  -0.0000000 -3.1650797  0.0000000
O   3.1650797 -0.0000000  0.0000000
O   0.0000000  0.0000000 -3.1650797
C  -2.0487891  0.0000000 -0.0000000
O  -3.1650797  0.0000000 -0.0000000
  
```

SCF energy GE0OPT = -770.1136460220 H

ZPE = 134.5 kJ/mol

FREEH energy = 172.97 kJ/mol

FREEH entropy = 0.49105 kJ/mol/K

\$vibrational spectrum

| #  | mode | symmetry | wave number<br>cm**(-1) | IR intensity<br>km/mol | selection rules<br>IR | RAMAN |
|----|------|----------|-------------------------|------------------------|-----------------------|-------|
| 1  |      |          | -0.00                   | 0.00000                | -                     | -     |
| 2  |      |          | 0.00                    | 0.00000                | -                     | -     |
| 3  |      |          | 0.00                    | 0.00000                | -                     | -     |
| 4  |      |          | 0.00                    | 0.00000                | -                     | -     |
| 5  |      |          | 0.00                    | 0.00000                | -                     | -     |
| 6  |      |          | 0.00                    | 0.00000                | -                     | -     |
| 7  |      | t2u      | 78.95                   | 0.00000                | NO                    | NO    |
| 8  |      | t2u      | 78.95                   | 0.00000                | NO                    | NO    |
| 9  |      | t2u      | 78.95                   | 0.00000                | NO                    | NO    |
| 10 |      | t2g      | 93.67                   | 0.00000                | NO                    | YES   |
| 11 |      | t2g      | 93.67                   | 0.00000                | NO                    | YES   |
| 12 |      | t2g      | 93.67                   | 0.00000                | NO                    | YES   |
| 13 |      | t1u      | 102.82                  | 0.00310                | YES                   | NO    |
| 14 |      | t1u      | 102.82                  | 0.00310                | YES                   | NO    |
| 15 |      | t1u      | 102.82                  | 0.00310                | YES                   | NO    |
| 16 |      | t1u      | 322.11                  | 37.01062               | YES                   | NO    |
| 17 |      | t1u      | 322.11                  | 37.01062               | YES                   | NO    |
| 18 |      | t1u      | 322.11                  | 37.01062               | YES                   | NO    |
| 19 |      | t1g      | 347.41                  | 0.00000                | NO                    | NO    |
| 20 |      | t1g      | 347.41                  | 0.00000                | NO                    | NO    |
| 21 |      | t1g      | 347.41                  | 0.00000                | NO                    | NO    |
| 22 |      | eg       | 393.40                  | 0.00000                | NO                    | YES   |
| 23 |      | eg       | 393.40                  | 0.00000                | NO                    | YES   |
| 24 |      | a1g      | 419.35                  | 0.00000                | NO                    | YES   |
| 25 |      | t2g      | 481.82                  | 0.00000                | NO                    | YES   |
| 26 |      | t2g      | 481.82                  | 0.00000                | NO                    | YES   |
| 27 |      | t2g      | 481.82                  | 0.00000                | NO                    | YES   |
| 28 |      | t2u      | 521.21                  | 0.00000                | NO                    | NO    |
| 29 |      | t2u      | 521.21                  | 0.00000                | NO                    | NO    |
| 30 |      | t2u      | 521.21                  | 0.00000                | NO                    | NO    |
| 31 |      | t1u      | 576.66                  | 84.60866               | YES                   | NO    |
| 32 |      | t1u      | 576.66                  | 84.60866               | YES                   | NO    |
| 33 |      | t1u      | 576.66                  | 84.60866               | YES                   | NO    |
| 34 |      | t1u      | 2266.91                 | 559.55988              | YES                   | NO    |
| 35 |      | t1u      | 2266.91                 | 559.55988              | YES                   | NO    |
| 36 |      | t1u      | 2266.91                 | 559.55988              | YES                   | NO    |
| 37 |      | eg       | 2288.31                 | 0.00000                | NO                    | YES   |
| 38 |      | eg       | 2288.31                 | 0.00000                | NO                    | YES   |
| 39 |      | a1g      | 2334.26                 | 0.00000                | NO                    | YES   |

\$end

\$raman spectrum

| # | mode | symmetry | wave number<br>cm**(-1) | selection rule | derivative of<br>isotropic<br>polarizability<br>a.u. | derivative of<br>polarizability<br>anisotropy<br>a.u. | raman<br>scattering<br>cross sections<br>bohr**2/sr |
|---|------|----------|-------------------------|----------------|------------------------------------------------------|-------------------------------------------------------|-----------------------------------------------------|
| 1 |      |          | 0.00                    | -              | 0.000000                                             | 0.000000                                              | 0.00000D+00 0.00000D+00 0.00000D+00                 |
| 2 |      |          | 0.00                    | -              | 0.000000                                             | 0.000000                                              | 0.00000D+00 0.00000D+00 0.00000D+00                 |
| 3 |      |          | 0.00                    | -              | 0.000000                                             | 0.000000                                              | 0.00000D+00 0.00000D+00 0.00000D+00                 |
| 4 |      |          | 0.00                    | -              | 0.000000                                             | 0.000000                                              | 0.00000D+00 0.00000D+00 0.00000D+00                 |
| 5 |      |          | 0.00                    | -              | 0.000000                                             | 0.000000                                              | 0.00000D+00 0.00000D+00 0.00000D+00                 |
| 6 |      |          | 0.00                    | -              | 0.000000                                             | 0.000000                                              | 0.00000D+00 0.00000D+00 0.00000D+00                 |



|    |     |         |     |           |          |             |             |
|----|-----|---------|-----|-----------|----------|-------------|-------------|
| 7  | t2u | 78.95   | NO  | 0.000000  | 0.000000 | 0.00000D+00 | 0.00000D+00 |
| 8  | t2u | 78.95   | NO  | 0.000000  | 0.000000 | 0.00000D+00 | 0.00000D+00 |
| 9  | t2u | 78.95   | NO  | 0.000000  | 0.000000 | 0.00000D+00 | 0.00000D+00 |
| 10 | t2g | 93.67   | YES | 0.000000  | 0.080183 | 0.16867D-13 | 0.12650D-13 |
| 11 | t2g | 93.67   | YES | 0.000000  | 0.080183 | 0.16867D-13 | 0.12650D-13 |
| 12 | t2g | 93.67   | YES | 0.000000  | 0.080183 | 0.16867D-13 | 0.12650D-13 |
| 13 | t1u | 102.82  | NO  | 0.000000  | 0.000000 | 0.00000D+00 | 0.00000D+00 |
| 14 | t1u | 102.82  | NO  | 0.000000  | 0.000000 | 0.00000D+00 | 0.00000D+00 |
| 15 | t1u | 102.82  | NO  | 0.000000  | 0.000000 | 0.12067D-35 | 0.90503D-36 |
| 16 | t1u | 322.11  | NO  | 0.000000  | 0.000000 | 0.00000D+00 | 0.00000D+00 |
| 17 | t1u | 322.11  | NO  | 0.000000  | 0.000000 | 0.00000D+00 | 0.00000D+00 |
| 18 | t1u | 322.11  | NO  | 0.000000  | 0.000000 | 0.00000D+00 | 0.00000D+00 |
| 19 | t1g | 347.41  | NO  | 0.000000  | 0.000000 | 0.00000D+00 | 0.00000D+00 |
| 20 | t1g | 347.41  | NO  | 0.000000  | 0.000000 | 0.00000D+00 | 0.00000D+00 |
| 21 | t1g | 347.41  | NO  | 0.000000  | 0.000000 | 0.00000D+00 | 0.00000D+00 |
| 22 | eg  | 393.40  | YES | -0.000000 | 0.004540 | 0.48314D-17 | 0.36236D-17 |
| 23 | eg  | 393.40  | YES | 0.000000  | 0.004540 | 0.48314D-17 | 0.36236D-17 |
| 24 | a1g | 419.35  | YES | 0.044059  | 0.000000 | 0.46503D-14 | 0.62335D-30 |
| 25 | t2g | 481.82  | YES | 0.000000  | 0.012740 | 0.28139D-16 | 0.21104D-16 |
| 26 | t2g | 481.82  | YES | 0.000000  | 0.012740 | 0.28139D-16 | 0.21104D-16 |
| 27 | t2g | 481.82  | YES | 0.000000  | 0.012740 | 0.28139D-16 | 0.21104D-16 |
| 28 | t2u | 521.21  | NO  | 0.000000  | 0.000000 | 0.00000D+00 | 0.00000D+00 |
| 29 | t2u | 521.21  | NO  | 0.000000  | 0.000000 | 0.00000D+00 | 0.00000D+00 |
| 30 | t2u | 521.21  | NO  | 0.000000  | 0.000000 | 0.00000D+00 | 0.00000D+00 |
| 31 | t1u | 576.66  | NO  | 0.000000  | 0.000000 | 0.00000D+00 | 0.00000D+00 |
| 32 | t1u | 576.66  | NO  | 0.000000  | 0.000000 | 0.00000D+00 | 0.00000D+00 |
| 33 | t1u | 576.66  | NO  | 0.000000  | 0.000000 | 0.00000D+00 | 0.00000D+00 |
| 34 | t1u | 2266.91 | NO  | 0.000000  | 0.000000 | 0.00000D+00 | 0.00000D+00 |
| 35 | t1u | 2266.91 | NO  | 0.000000  | 0.000000 | 0.00000D+00 | 0.00000D+00 |
| 36 | t1u | 2266.91 | NO  | 0.000000  | 0.000000 | 0.00000D+00 | 0.00000D+00 |
| 37 | eg  | 2288.31 | YES | 0.000000  | 0.509414 | 0.34553D-14 | 0.25915D-14 |
| 38 | eg  | 2288.31 | YES | -0.000000 | 0.509414 | 0.34553D-14 | 0.25915D-14 |
| 39 | a1g | 2334.26 | YES | -0.190087 | 0.000000 | 0.51701D-14 | 0.39714D-30 |

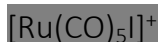

Method: (RI-)B3LYP(D3BJ)/def2-TZVPP  
Symmetry: c4v

Cartesian coordinates in Ångström:

|    |            |            |            |
|----|------------|------------|------------|
| I  | 0.0000000  | 0.0000000  | -2.7982790 |
| Ru | 0.0000000  | -0.0000000 | -0.0455790 |
| O  | -0.0000000 | -3.1096726 | -0.3252698 |
| O  | 0.0000000  | 0.0000000  | 3.0467970  |
| C  | 0.0000000  | -1.9945407 | -0.2058014 |
| C  | 0.0000000  | 0.0000000  | 1.9213457  |
| O  | 0.0000000  | 3.1096726  | -0.3252698 |
| C  | 0.0000000  | 1.9945407  | -0.2058014 |
| O  | 3.1096726  | -0.0000000 | -0.3252698 |
| C  | 1.9945407  | 0.0000000  | -0.2058014 |
| O  | -3.1096726 | 0.0000000  | -0.3252698 |
| C  | -1.9945407 | -0.0000000 | -0.2058014 |

SCF energy GE0OPT = -959.1573105631 H  
ZPE = 112.8 kJ/mol  
FREEH energy = 150.52 kJ/mol  
FREEH entropy = 0.51242 kJ/mol/K

\$vibrational spectrum

| #  | mode | symmetry | wave number<br>cm**(-1) | IR intensity<br>km/mol | selection rules<br>IR | RAMAN |
|----|------|----------|-------------------------|------------------------|-----------------------|-------|
| 1  |      |          | -0.00                   | 0.00000                | -                     | -     |
| 2  |      |          | 0.00                    | 0.00000                | -                     | -     |
| 3  |      |          | 0.00                    | 0.00000                | -                     | -     |
| 4  |      |          | 0.00                    | 0.00000                | -                     | -     |
| 5  |      |          | 0.00                    | 0.00000                | -                     | -     |
| 6  |      |          | 0.00                    | 0.00000                | -                     | -     |
| 7  |      | e        | 62.55                   | 1.06564                | YES                   | YES   |
| 8  |      | e        | 62.55                   | 1.06564                | YES                   | YES   |
| 9  |      | b1       | 74.50                   | 0.00000                | NO                    | YES   |
| 10 |      | e        | 85.54                   | 0.08530                | YES                   | YES   |
| 11 |      | e        | 85.54                   | 0.08530                | YES                   | YES   |

|    |    |         |           |     |     |
|----|----|---------|-----------|-----|-----|
| 12 | b2 | 92.74   | 0.00000   | NO  | YES |
| 13 | e  | 101.20  | 0.80085   | YES | YES |
| 14 | e  | 101.20  | 0.80085   | YES | YES |
| 15 | a1 | 103.26  | 1.13715   | YES | YES |
| 16 | a1 | 191.81  | 1.90886   | YES | YES |
| 17 | e  | 338.58  | 21.96700  | YES | YES |
| 18 | e  | 338.58  | 21.96700  | YES | YES |
| 19 | a2 | 345.53  | 0.00000   | NO  | NO  |
| 20 | e  | 384.60  | 2.32621   | YES | YES |
| 21 | e  | 384.60  | 2.32621   | YES | YES |
| 22 | b1 | 395.35  | 0.00000   | NO  | YES |
| 23 | a1 | 398.13  | 3.13557   | YES | YES |
| 24 | a1 | 410.22  | 0.16482   | YES | YES |
| 25 | b1 | 483.61  | 0.00000   | NO  | YES |
| 26 | b2 | 494.89  | 0.00000   | NO  | YES |
| 27 | e  | 504.63  | 6.53408   | YES | YES |
| 28 | e  | 504.63  | 6.53408   | YES | YES |
| 29 | e  | 579.01  | 69.22085  | YES | YES |
| 30 | e  | 579.01  | 69.22085  | YES | YES |
| 31 | a1 | 588.93  | 157.17852 | YES | YES |
| 32 | a1 | 2198.10 | 476.41380 | YES | YES |
| 33 | e  | 2220.56 | 721.36720 | YES | YES |
| 34 | e  | 2220.56 | 721.36720 | YES | YES |
| 35 | b1 | 2241.32 | 0.00000   | NO  | YES |
| 36 | a1 | 2280.96 | 73.16201  | YES | YES |

## Anthracene<sup>Hal</sup>

Method: (RI-)B3LYP(D3BJ)/def2-TZVPP  
Symmetry: c2h

Cartesian coordinates in Ångström:

|    |            |            |            |
|----|------------|------------|------------|
| C  | 0.7017848  | -0.0198348 | -3.6749582 |
| C  | -0.7017848 | 0.0198348  | -3.6749582 |
| C  | -1.3887363 | 0.0614971  | -2.5002764 |
| C  | -0.7237612 | 0.0663536  | -1.2313360 |
| C  | 0.7237612  | -0.0663536 | -1.2313360 |
| C  | 1.3887363  | -0.0614971 | -2.5002764 |
| C  | 1.3970561  | -0.1768662 | 0.0000000  |
| C  | -1.3970561 | 0.1768662  | 0.0000000  |
| C  | -0.7237612 | 0.0663536  | 1.2313360  |
| C  | 0.7237612  | -0.0663536 | 1.2313360  |
| C  | 1.3887363  | -0.0614971 | 2.5002764  |
| C  | -1.3887363 | 0.0614971  | 2.5002764  |
| C  | -0.7017848 | 0.0198348  | 3.6749582  |
| C  | 0.7017848  | -0.0198348 | 3.6749582  |
| F  | 1.3434914  | -0.0066994 | 4.8392254  |
| F  | 2.7185195  | -0.0492949 | 2.6146688  |
| F  | -1.3434914 | 0.0066994  | 4.8392254  |
| F  | -2.7185195 | 0.0492949  | 2.6146688  |
| Cl | 3.0870371  | -0.5750228 | 0.0000000  |
| Cl | -3.0870371 | 0.5750228  | 0.0000000  |
| F  | 2.7185195  | -0.0492949 | -2.6146688 |
| F  | 1.3434914  | -0.0066994 | -4.8392254 |
| F  | -1.3434914 | 0.0066994  | -4.8392254 |
| F  | -2.7185195 | 0.0492949  | -2.6146688 |

SCF energy GE0OPT = -2252.472358433 H

ZPE = 284.8 kJ/mol

FREEH energy = 333.53 kJ/mol

FREEH entropy = 0.58631 kJ/mol/K

\$vibrational spectrum

| #  | mode | symmetry | wave number<br>cm**(-1) | IR intensity<br>km/mol | selection rules<br>IR | RAMAN |
|----|------|----------|-------------------------|------------------------|-----------------------|-------|
| 1  |      | bu       | -17.86                  | 0.00000                | YES                   | NO    |
| 2  |      |          | -0.00                   | 0.00000                | -                     | -     |
| 3  |      |          | -0.00                   | 0.00000                | -                     | -     |
| 4  |      |          | 0.00                    | 0.00000                | -                     | -     |
| 5  |      |          | 0.00                    | 0.00000                | -                     | -     |
| 6  |      |          | 0.00                    | 0.00000                | -                     | -     |
| 7  |      |          | 0.00                    | 0.00000                | -                     | -     |
| 8  |      | au       | 19.58                   | 0.00127                | YES                   | NO    |
| 9  |      | ag       | 40.31                   | 0.00000                | NO                    | YES   |
| 10 |      | bu       | 58.08                   | 0.04289                | YES                   | NO    |

|    |    |         |           |     |     |
|----|----|---------|-----------|-----|-----|
| 11 | bg | 87.06   | 0.00000   | NO  | YES |
| 12 | ag | 152.10  | 0.00000   | NO  | YES |
| 13 | au | 153.41  | 0.05563   | YES | NO  |
| 14 | bu | 157.68  | 1.49156   | YES | NO  |
| 15 | bu | 164.87  | 0.42605   | YES | NO  |
| 16 | bg | 198.51  | 0.00000   | NO  | YES |
| 17 | bg | 236.61  | 0.00000   | NO  | YES |
| 18 | ag | 251.18  | 0.00000   | NO  | YES |
| 19 | au | 256.38  | 0.03104   | YES | NO  |
| 20 | bg | 261.94  | 0.00000   | NO  | YES |
| 21 | au | 292.10  | 0.27809   | YES | NO  |
| 22 | ag | 296.51  | 0.00000   | NO  | YES |
| 23 | bu | 313.52  | 2.65593   | YES | NO  |
| 24 | ag | 320.24  | 0.00000   | NO  | YES |
| 25 | bu | 328.27  | 5.33642   | YES | NO  |
| 26 | bg | 337.58  | 0.00000   | NO  | YES |
| 27 | ag | 348.10  | 0.00000   | NO  | YES |
| 28 | bu | 350.52  | 1.22760   | YES | NO  |
| 29 | au | 354.49  | 0.57951   | YES | NO  |
| 30 | au | 371.11  | 7.95302   | YES | NO  |
| 31 | ag | 371.39  | 0.00000   | NO  | YES |
| 32 | bg | 420.47  | 0.00000   | NO  | YES |
| 33 | ag | 446.53  | 0.00000   | NO  | YES |
| 34 | au | 458.90  | 1.11020   | YES | NO  |
| 35 | ag | 487.88  | 0.00000   | NO  | YES |
| 36 | bg | 498.10  | 0.00000   | NO  | YES |
| 37 | bu | 537.70  | 0.85604   | YES | NO  |
| 38 | bu | 573.19  | 0.65720   | YES | NO  |
| 39 | au | 639.66  | 63.08170  | YES | NO  |
| 40 | au | 650.21  | 27.15268  | YES | NO  |
| 41 | bg | 664.57  | 0.00000   | NO  | YES |
| 42 | ag | 683.19  | 0.00000   | NO  | YES |
| 43 | bg | 684.64  | 0.00000   | NO  | YES |
| 44 | bu | 691.43  | 1.53469   | YES | NO  |
| 45 | bu | 716.15  | 54.64981  | YES | NO  |
| 46 | au | 722.58  | 2.00867   | YES | NO  |
| 47 | ag | 753.74  | 0.00000   | NO  | YES |
| 48 | bg | 788.37  | 0.00000   | NO  | YES |
| 49 | ag | 849.56  | 0.00000   | NO  | YES |
| 50 | bu | 856.78  | 88.72765  | YES | NO  |
| 51 | bg | 1003.57 | 0.00000   | NO  | YES |
| 52 | ag | 1012.98 | 0.00000   | NO  | YES |
| 53 | bu | 1086.27 | 132.74687 | YES | NO  |
| 54 | au | 1096.09 | 310.77760 | YES | NO  |
| 55 | ag | 1165.68 | 0.00000   | NO  | YES |
| 56 | bu | 1199.61 | 145.32682 | YES | NO  |
| 57 | au | 1201.37 | 16.58651  | YES | NO  |
| 58 | bg | 1230.89 | 0.00000   | NO  | YES |
| 59 | au | 1238.38 | 14.80301  | YES | NO  |
| 60 | au | 1347.41 | 10.36485  | YES | NO  |
| 61 | ag | 1361.09 | 0.00000   | NO  | YES |
| 62 | bg | 1366.65 | 0.00000   | NO  | YES |
| 63 | bu | 1374.90 | 267.62900 | YES | NO  |
| 64 | ag | 1412.83 | 0.00000   | NO  | YES |
| 65 | bu | 1463.11 | 226.45397 | YES | NO  |
| 66 | au | 1525.00 | 948.29325 | YES | NO  |
| 67 | ag | 1534.02 | 0.00000   | NO  | YES |
| 68 | bg | 1562.81 | 0.00000   | NO  | YES |
| 69 | au | 1593.69 | 73.86058  | YES | NO  |
| 70 | ag | 1616.74 | 0.00000   | NO  | YES |
| 71 | bg | 1683.11 | 0.00000   | NO  | YES |
| 72 | bu | 1696.35 | 164.46929 | YES | NO  |

\$end

\$raman spectrum

| # | mode | symmetry | wave number | selection rule | derivative of isotropic polarizability a.u. | derivative of polarizability anisotropy a.u. | raman scattering cross sections bohr**2/sr | T,T         | II,II |
|---|------|----------|-------------|----------------|---------------------------------------------|----------------------------------------------|--------------------------------------------|-------------|-------|
| 1 | bu   | -17.86   | NO          |                | 0.000000                                    | 0.000000                                     | 0.00000D+00                                | 0.00000D+00 |       |
| 2 |      | 0.00     | -           |                | 0.000000                                    | 0.000000                                     | 0.00000D+00                                | 0.00000D+00 |       |
| 3 |      | 0.00     | -           |                | 0.000000                                    | 0.000000                                     | 0.00000D+00                                | 0.00000D+00 |       |
| 4 |      | 0.00     | -           |                | 0.000000                                    | 0.000000                                     | 0.00000D+00                                | 0.00000D+00 |       |
| 5 |      | 0.00     | -           |                | 0.000000                                    | 0.000000                                     | 0.00000D+00                                | 0.00000D+00 |       |
| 6 |      | 0.00     | -           |                | 0.000000                                    | 0.000000                                     | 0.00000D+00                                | 0.00000D+00 |       |
| 7 |      | 0.00     | -           |                | 0.000000                                    | 0.000000                                     | 0.00000D+00                                | 0.00000D+00 |       |

|    |    |         |     |           |          |             |             |
|----|----|---------|-----|-----------|----------|-------------|-------------|
| 8  | au | 19.58   | NO  | 0.000000  | 0.000000 | 0.00000D+00 | 0.00000D+00 |
| 9  | ag | 40.31   | YES | -0.000613 | 0.022397 | 0.64905D-14 | 0.48271D-14 |
| 10 | bu | 58.08   | NO  | 0.000000  | 0.000000 | 0.00000D+00 | 0.00000D+00 |
| 11 | bg | 87.06   | YES | 0.000000  | 0.027914 | 0.23382D-14 | 0.17536D-14 |
| 12 | ag | 152.10  | YES | -0.000364 | 0.013168 | 0.19267D-15 | 0.14327D-15 |
| 13 | au | 153.41  | NO  | 0.000000  | 0.000000 | 0.00000D+00 | 0.00000D+00 |
| 14 | bu | 157.68  | NO  | 0.000000  | 0.000000 | 0.00000D+00 | 0.00000D+00 |
| 15 | bu | 164.87  | NO  | 0.000000  | 0.000000 | 0.00000D+00 | 0.00000D+00 |
| 16 | bg | 198.51  | YES | 0.000000  | 0.075477 | 0.39767D-14 | 0.29825D-14 |
| 17 | bg | 236.61  | YES | 0.000000  | 0.057166 | 0.17042D-14 | 0.12781D-14 |
| 18 | ag | 251.18  | YES | 0.027811  | 0.059415 | 0.57860D-14 | 0.12525D-14 |
| 19 | au | 256.38  | NO  | 0.000000  | 0.000000 | 0.00000D+00 | 0.00000D+00 |
| 20 | bg | 261.94  | YES | 0.000000  | 0.120796 | 0.64498D-14 | 0.48373D-14 |
| 21 | au | 292.10  | NO  | 0.000000  | 0.000000 | 0.00000D+00 | 0.00000D+00 |
| 22 | ag | 296.51  | YES | -0.023862 | 0.034595 | 0.27572D-14 | 0.32553D-15 |
| 23 | bu | 313.52  | NO  | 0.000000  | 0.000000 | 0.00000D+00 | 0.00000D+00 |
| 24 | ag | 320.24  | YES | 0.041820  | 0.062247 | 0.75685D-14 | 0.93393D-15 |
| 25 | bu | 328.27  | NO  | 0.000000  | 0.000000 | 0.00000D+00 | 0.00000D+00 |
| 26 | bg | 337.58  | YES | 0.000000  | 0.022675 | 0.15224D-15 | 0.11418D-15 |
| 27 | ag | 348.10  | YES | -0.025207 | 0.052906 | 0.28092D-14 | 0.59287D-15 |
| 28 | bu | 350.52  | NO  | 0.000000  | 0.000000 | 0.00000D+00 | 0.00000D+00 |
| 29 | au | 354.49  | NO  | 0.000000  | 0.000000 | 0.00000D+00 | 0.00000D+00 |
| 30 | au | 371.11  | NO  | 0.000000  | 0.000000 | 0.00000D+00 | 0.00000D+00 |
| 31 | ag | 371.39  | YES | -0.033018 | 0.047571 | 0.37157D-14 | 0.43409D-15 |
| 32 | bg | 420.47  | YES | 0.000000  | 0.062371 | 0.82506D-15 | 0.61880D-15 |
| 33 | ag | 446.53  | YES | -0.009614 | 0.033478 | 0.41902D-15 | 0.16302D-15 |
| 34 | au | 458.90  | NO  | 0.000000  | 0.000000 | 0.00000D+00 | 0.00000D+00 |
| 35 | ag | 487.88  | YES | -0.045995 | 0.052376 | 0.45177D-14 | 0.35018D-15 |
| 36 | bg | 498.10  | YES | 0.000000  | 0.058064 | 0.55668D-15 | 0.41751D-15 |
| 37 | bu | 537.70  | NO  | 0.000000  | 0.000000 | 0.00000D+00 | 0.00000D+00 |
| 38 | bu | 573.19  | NO  | 0.000000  | 0.000000 | 0.00000D+00 | 0.00000D+00 |
| 39 | au | 639.66  | NO  | 0.000000  | 0.000000 | 0.00000D+00 | 0.00000D+00 |
| 40 | au | 650.21  | NO  | 0.000000  | 0.000000 | 0.00000D+00 | 0.00000D+00 |
| 41 | bg | 664.57  | YES | 0.000000  | 0.065301 | 0.46388D-15 | 0.34791D-15 |
| 42 | ag | 683.19  | YES | 0.015113  | 0.052233 | 0.55383D-15 | 0.21391D-15 |
| 43 | bg | 684.64  | YES | 0.000000  | 0.054181 | 0.30596D-15 | 0.22947D-15 |
| 44 | bu | 691.43  | NO  | 0.000000  | 0.000000 | 0.00000D+00 | 0.00000D+00 |
| 45 | bu | 716.15  | NO  | 0.000000  | 0.000000 | 0.00000D+00 | 0.00000D+00 |
| 46 | au | 722.58  | NO  | 0.000000  | 0.000000 | 0.00000D+00 | 0.00000D+00 |
| 47 | ag | 753.74  | YES | -0.000636 | 0.039011 | 0.13848D-15 | 0.10355D-15 |
| 48 | bg | 788.37  | YES | 0.000000  | 0.027467 | 0.64126D-16 | 0.48095D-16 |
| 49 | ag | 849.56  | YES | 0.047616  | 0.106367 | 0.28063D-14 | 0.64672D-15 |
| 50 | bu | 856.78  | NO  | 0.000000  | 0.000000 | 0.00000D+00 | 0.00000D+00 |
| 51 | bg | 1003.57 | YES | 0.000000  | 0.015869 | 0.14976D-16 | 0.11232D-16 |
| 52 | ag | 1012.98 | YES | 0.028586  | 0.124758 | 0.14516D-14 | 0.68442D-15 |
| 53 | bu | 1086.27 | NO  | 0.000000  | 0.000000 | 0.00000D+00 | 0.00000D+00 |
| 54 | au | 1096.09 | NO  | 0.000000  | 0.000000 | 0.00000D+00 | 0.00000D+00 |
| 55 | ag | 1165.68 | YES | -0.112202 | 0.282185 | 0.10433D-13 | 0.28160D-14 |
| 56 | bu | 1199.61 | NO  | 0.000000  | 0.000000 | 0.00000D+00 | 0.00000D+00 |
| 57 | au | 1201.37 | NO  | 0.000000  | 0.000000 | 0.00000D+00 | 0.00000D+00 |
| 58 | bg | 1230.89 | YES | 0.000000  | 0.002695 | 0.31393D-18 | 0.23545D-18 |
| 59 | au | 1238.38 | NO  | 0.000000  | 0.000000 | 0.00000D+00 | 0.00000D+00 |
| 60 | au | 1347.41 | NO  | 0.000000  | 0.000000 | 0.00000D+00 | 0.00000D+00 |
| 61 | ag | 1361.09 | YES | -0.338851 | 0.551386 | 0.58409D-13 | 0.83462D-14 |
| 62 | bg | 1366.65 | YES | 0.000000  | 0.093162 | 0.31550D-15 | 0.23663D-15 |
| 63 | bu | 1374.90 | NO  | 0.000000  | 0.000000 | 0.00000D+00 | 0.00000D+00 |
| 64 | ag | 1412.83 | YES | -0.045843 | 0.446279 | 0.76540D-14 | 0.51313D-14 |
| 65 | bu | 1463.11 | NO  | 0.000000  | 0.000000 | 0.00000D+00 | 0.00000D+00 |
| 66 | au | 1525.00 | NO  | 0.000000  | 0.000000 | 0.00000D+00 | 0.00000D+00 |
| 67 | ag | 1534.02 | YES | -0.118581 | 0.406372 | 0.96180D-14 | 0.36842D-14 |
| 68 | bg | 1562.81 | YES | 0.000000  | 0.554221 | 0.88374D-14 | 0.66281D-14 |
| 69 | au | 1593.69 | NO  | 0.000000  | 0.000000 | 0.00000D+00 | 0.00000D+00 |
| 70 | ag | 1616.74 | YES | 0.158656  | 0.449715 | 0.13131D-13 | 0.41031D-14 |
| 71 | bg | 1683.11 | YES | 0.000000  | 0.301210 | 0.22778D-14 | 0.17083D-14 |
| 72 | bu | 1696.35 | NO  | 0.000000  | 0.000000 | 0.00000D+00 | 0.00000D+00 |

[Anthracene<sup>Hal</sup>]<sup>+</sup>

Method: (RI-)BP86(D3BJ)/def2-TZVPP  
Symmetry: cs

Cartesian coordinates in Ångström:

|   |            |           |            |
|---|------------|-----------|------------|
| C | 0.6968884  | 0.1531083 | -3.6925913 |
| C | -0.7013152 | 0.1320171 | -3.6925546 |
| C | -1.3957681 | 0.0082202 | -2.4886893 |

|    |            |            |            |
|----|------------|------------|------------|
| C  | -0.7251881 | -0.1130040 | -1.2401142 |
| C  | 0.7283844  | -0.0910720 | -1.2401274 |
| C  | 1.3948808  | 0.0501979  | -2.4887932 |
| C  | 1.4175180  | -0.2229164 | 0.0000000  |
| C  | -1.4099716 | -0.2657679 | 0.0000000  |
| C  | -0.7251881 | -0.1130040 | 1.2401142  |
| C  | 0.7283844  | -0.0910720 | 1.2401274  |
| C  | 1.3948808  | 0.0501979  | 2.4887932  |
| C  | -1.3957681 | 0.0082202  | 2.4886893  |
| C  | -0.7013152 | 0.1320171  | 3.6925546  |
| C  | 0.6968884  | 0.1531083  | 3.6925913  |
| F  | 1.3543480  | 0.3008522  | 4.8277278  |
| F  | 2.7140764  | 0.1460665  | 2.5886032  |
| F  | -1.3630284 | 0.2597445  | 4.8276364  |
| F  | -2.7172673 | 0.0646056  | 2.5882661  |
| Cl | 3.0775389  | -0.6197259 | 0.0000000  |
| Cl | -3.0571070 | -0.7130622 | 0.0000000  |
| F  | 2.7140764  | 0.1460665  | -2.5886032 |
| F  | 1.3543480  | 0.3008522  | -4.8277278 |
| F  | -1.3630284 | 0.2597445  | -4.8276364 |
| F  | -2.7172673 | 0.0646056  | -2.5882661 |

SCF energy GE0OPT = -2253.077486613 H  
 ZPE = 278.8 kJ/mol  
 FREEH energy = 330.59 kJ/mol  
 FREEH entropy = 0.61776 kJ/mol/K

\$vibrational spectrum

| # | mode | symmetry | wave number<br>cm**(-1) | IR intensity<br>km/mol | selection rules<br>IR | RAMAN |
|---|------|----------|-------------------------|------------------------|-----------------------|-------|
|   | 1    |          | -0.00                   | 0.00000                | -                     | -     |
|   | 2    |          | -0.00                   | 0.00000                | -                     | -     |
|   | 3    |          | 0.00                    | 0.00000                | -                     | -     |
|   | 4    |          | 0.00                    | 0.00000                | -                     | -     |
|   | 5    |          | 0.00                    | 0.00000                | -                     | -     |
|   | 6    |          | 0.00                    | 0.00000                | -                     | -     |
|   | 7    | a''      | 27.20                   | 0.00000                | YES                   | YES   |
|   | 8    | a'       | 31.75                   | 0.12078                | YES                   | YES   |
|   | 9    | a'       | 44.44                   | 0.01916                | YES                   | YES   |
|   | 10   | a'       | 74.30                   | 0.00106                | YES                   | YES   |
|   | 11   | a''      | 85.30                   | 0.00594                | YES                   | YES   |
|   | 12   | a'       | 137.63                  | 0.03426                | YES                   | YES   |
|   | 13   | a''      | 140.47                  | 0.00000                | YES                   | YES   |
|   | 14   | a'       | 146.30                  | 1.57553                | YES                   | YES   |
|   | 15   | a'       | 157.77                  | 0.09499                | YES                   | YES   |
|   | 16   | a''      | 200.40                  | 0.29659                | YES                   | YES   |
|   | 17   | a''      | 222.22                  | 0.00000                | YES                   | YES   |
|   | 18   | a''      | 245.74                  | 0.01018                | YES                   | YES   |
|   | 19   | a'       | 246.59                  | 0.90056                | YES                   | YES   |
|   | 20   | a''      | 251.05                  | 0.00000                | YES                   | YES   |
|   | 21   | a''      | 282.44                  | 2.45555                | YES                   | YES   |
|   | 22   | a'       | 285.06                  | 0.15634                | YES                   | YES   |
|   | 23   | a'       | 302.60                  | 2.99655                | YES                   | YES   |
|   | 24   | a'       | 312.85                  | 2.27889                | YES                   | YES   |
|   | 25   | a''      | 317.07                  | 0.00000                | YES                   | YES   |
|   | 26   | a'       | 326.48                  | 0.00220                | YES                   | YES   |
|   | 27   | a'       | 342.13                  | 0.50238                | YES                   | YES   |
|   | 28   | a''      | 348.64                  | 4.65352                | YES                   | YES   |
|   | 29   | a'       | 362.88                  | 0.06287                | YES                   | YES   |
|   | 30   | a'       | 371.28                  | 0.08405                | YES                   | YES   |
|   | 31   | a''      | 381.34                  | 2.93940                | YES                   | YES   |
|   | 32   | a''      | 382.19                  | 0.00043                | YES                   | YES   |
|   | 33   | a''      | 438.97                  | 1.53521                | YES                   | YES   |
|   | 34   | a'       | 461.38                  | 1.61833                | YES                   | YES   |
|   | 35   | a'       | 473.14                  | 0.00003                | YES                   | YES   |
|   | 36   | a''      | 475.55                  | 0.00000                | YES                   | YES   |
|   | 37   | a'       | 523.76                  | 0.42206                | YES                   | YES   |
|   | 38   | a'       | 576.83                  | 0.00687                | YES                   | YES   |
|   | 39   | a''      | 616.67                  | 0.00000                | YES                   | YES   |
|   | 40   | a''      | 634.95                  | 25.67378               | YES                   | YES   |
|   | 41   | a''      | 651.81                  | 5.94838                | YES                   | YES   |
|   | 42   | a''      | 661.39                  | 0.00000                | YES                   | YES   |
|   | 43   | a'       | 665.09                  | 0.00139                | YES                   | YES   |
|   | 44   | a'       | 678.52                  | 0.15740                | YES                   | YES   |
|   | 45   | a''      | 690.29                  | 0.00000                | YES                   | YES   |
|   | 46   | a'       | 706.95                  | 3.01249                | YES                   | YES   |

|    |     |         |            |     |     |
|----|-----|---------|------------|-----|-----|
| 47 | a'  | 727.75  | 41.65241   | YES | YES |
| 48 | a'' | 771.43  | 0.00000    | YES | YES |
| 49 | a'  | 842.92  | 84.96128   | YES | YES |
| 50 | a'  | 845.29  | 6.41340    | YES | YES |
| 51 | a'' | 994.24  | 0.00000    | YES | YES |
| 52 | a'  | 1009.24 | 4.02967    | YES | YES |
| 53 | a'  | 1080.65 | 70.00230   | YES | YES |
| 54 | a'' | 1090.51 | 194.60336  | YES | YES |
| 55 | a'  | 1170.93 | 1.38821    | YES | YES |
| 56 | a'  | 1186.70 | 165.12425  | YES | YES |
| 57 | a'' | 1199.28 | 31.05291   | YES | YES |
| 58 | a'' | 1232.10 | 0.00002    | YES | YES |
| 59 | a'' | 1321.47 | 443.89279  | YES | YES |
| 60 | a'  | 1342.46 | 17.37933   | YES | YES |
| 61 | a'' | 1345.46 | 119.27106  | YES | YES |
| 62 | a'  | 1348.04 | 127.72724  | YES | YES |
| 63 | a'' | 1366.22 | 0.00016    | YES | YES |
| 64 | a'  | 1376.16 | 7.89150    | YES | YES |
| 65 | a'  | 1438.61 | 455.40838  | YES | YES |
| 66 | a'' | 1459.12 | 0.20601    | YES | YES |
| 67 | a'' | 1459.68 | 1409.24688 | YES | YES |
| 68 | a'  | 1512.62 | 4.95717    | YES | YES |
| 69 | a'' | 1540.29 | 0.66510    | YES | YES |
| 70 | a'' | 1540.37 | 209.97502  | YES | YES |
| 71 | a'  | 1555.70 | 1.31987    | YES | YES |
| 72 | a'  | 1566.07 | 277.49678  | YES | YES |

\$end

\$raman spectrum

| #  | mode | symmetry | wave number | selection rule | derivative of isotropic polarizability a.u. | derivative of polarizability anisotropy a.u. | raman scattering cross sections bohr**2/sr |
|----|------|----------|-------------|----------------|---------------------------------------------|----------------------------------------------|--------------------------------------------|
| #  |      |          | cm**(-1)    |                |                                             |                                              | T,T II,II                                  |
| 1  |      |          | 0.00        | -              | 0.000000                                    | 0.000000                                     | 0.00000D+00 0.00000D+00                    |
| 2  |      |          | 0.00        | -              | 0.000000                                    | 0.000000                                     | 0.00000D+00 0.00000D+00                    |
| 3  |      |          | 0.00        | -              | 0.000000                                    | 0.000000                                     | 0.00000D+00 0.00000D+00                    |
| 4  |      |          | 0.00        | -              | 0.000000                                    | 0.000000                                     | 0.00000D+00 0.00000D+00                    |
| 5  |      |          | 0.00        | -              | 0.000000                                    | 0.000000                                     | 0.00000D+00 0.00000D+00                    |
| 6  |      |          | 0.00        | -              | 0.000000                                    | 0.000000                                     | 0.00000D+00 0.00000D+00                    |
| 7  | a''  |          | 27.20       | YES            | 0.000000                                    | 0.007604                                     | 0.15891D-14 0.11918D-14                    |
| 8  | a'   |          | 31.75       | YES            | -0.001211                                   | 0.035647                                     | 0.26190D-13 0.19391D-13                    |
| 9  | a'   |          | 44.44       | YES            | 0.000004                                    | 0.010415                                     | 0.11543D-14 0.86571D-15                    |
| 10 | a'   |          | 74.30       | YES            | 0.013634                                    | 0.047276                                     | 0.17413D-13 0.67471D-14                    |
| 11 | a''  |          | 85.30       | YES            | 0.000000                                    | 0.009226                                     | 0.26525D-15 0.19894D-15                    |
| 12 | a'   |          | 137.63      | YES            | 0.000014                                    | 0.005631                                     | 0.41626D-16 0.31217D-16                    |
| 13 | a''  |          | 140.47      | YES            | 0.000000                                    | 0.004755                                     | 0.28634D-16 0.21476D-16                    |
| 14 | a'   |          | 146.30      | YES            | 0.010163                                    | 0.024584                                     | 0.20828D-14 0.53448D-15                    |
| 15 | a'   |          | 157.77      | YES            | -0.000007                                   | 0.022213                                     | 0.51010D-15 0.38257D-15                    |
| 16 | a''  |          | 200.40      | YES            | 0.000000                                    | 0.076076                                     | 0.39761D-14 0.29821D-14                    |
| 17 | a''  |          | 222.22      | YES            | 0.000000                                    | 0.022155                                     | 0.28383D-15 0.21287D-15                    |
| 18 | a''  |          | 245.74      | YES            | 0.000000                                    | 0.036660                                     | 0.65880D-15 0.49410D-15                    |
| 19 | a'   |          | 246.59      | YES            | 0.076269                                    | 0.198224                                     | 0.51052D-13 0.14365D-13                    |
| 20 | a''  |          | 251.05      | YES            | 0.000000                                    | 0.081191                                     | 0.31210D-14 0.23408D-14                    |
| 21 | a''  |          | 282.44      | YES            | 0.000000                                    | 0.023582                                     | 0.21786D-15 0.16339D-15                    |
| 22 | a'   |          | 285.06      | YES            | -0.052262                                   | 0.098288                                     | 0.15590D-13 0.27969D-14                    |
| 23 | a'   |          | 302.60      | YES            | 0.054356                                    | 0.061714                                     | 0.13012D-13 0.10033D-14                    |
| 24 | a'   |          | 312.85      | YES            | 0.000230                                    | 0.014263                                     | 0.68006D-16 0.50855D-16                    |
| 25 | a''  |          | 317.07      | YES            | 0.000000                                    | 0.051884                                     | 0.87865D-15 0.65899D-15                    |
| 26 | a'   |          | 326.48      | YES            | 0.000013                                    | 0.039748                                     | 0.49270D-15 0.36952D-15                    |
| 27 | a'   |          | 342.13      | YES            | 0.085539                                    | 0.187111                                     | 0.34030D-13 0.76159D-14                    |
| 28 | a''  |          | 348.64      | YES            | 0.000000                                    | 0.014628                                     | 0.60287D-16 0.45215D-16                    |
| 29 | a'   |          | 362.88      | YES            | 0.120754                                    | 0.290959                                     | 0.65897D-13 0.16824D-13                    |
| 30 | a'   |          | 371.28      | YES            | -0.000164                                   | 0.017326                                     | 0.76887D-16 0.57607D-16                    |
| 31 | a''  |          | 381.34      | YES            | 0.000000                                    | 0.070990                                     | 0.12382D-14 0.92863D-15                    |
| 32 | a''  |          | 382.19      | YES            | 0.000000                                    | 0.013241                                     | 0.42929D-16 0.32197D-16                    |
| 33 | a''  |          | 438.97      | YES            | 0.000000                                    | 0.055696                                     | 0.61704D-15 0.46278D-15                    |
| 34 | a'   |          | 461.38      | YES            | -0.000101                                   | 0.042872                                     | 0.33965D-15 0.25472D-15                    |
| 35 | a'   |          | 473.14      | YES            | -0.044301                                   | 0.065710                                     | 0.46999D-14 0.57659D-15                    |
| 36 | a''  |          | 475.55      | YES            | 0.000000                                    | 0.086612                                     | 0.13257D-14 0.99430D-15                    |
| 37 | a'   |          | 523.76      | YES            | -0.000030                                   | 0.003657                                     | 0.20535D-17 0.15390D-17                    |
| 38 | a'   |          | 576.83      | YES            | 0.019102                                    | 0.044531                                     | 0.81219D-15 0.19842D-15                    |
| 39 | a''  |          | 616.67      | YES            | 0.000000                                    | 0.003198                                     | 0.12388D-17 0.92911D-18                    |
| 40 | a''  |          | 634.95      | YES            | 0.000000                                    | 0.054452                                     | 0.34444D-15 0.25833D-15                    |
| 41 | a''  |          | 651.81      | YES            | 0.000000                                    | 0.068054                                     | 0.51808D-15 0.38856D-15                    |
| 42 | a''  |          | 661.39      | YES            | 0.000000                                    | 0.008094                                     | 0.71767D-17 0.53825D-17                    |
| 43 | a'   |          | 665.09      | YES            | -0.000016                                   | 0.005657                                     | 0.34778D-17 0.26081D-17                    |

|    |     |         |     |           |          |             |             |
|----|-----|---------|-----|-----------|----------|-------------|-------------|
| 44 | a'  | 678.52  | YES | 0.001188  | 0.064535 | 0.44139D-15 | 0.32979D-15 |
| 45 | a'' | 690.29  | YES | 0.000000  | 0.021611 | 0.48104D-16 | 0.36078D-16 |
| 46 | a'  | 706.95  | YES | 0.000019  | 0.035227 | 0.12349D-15 | 0.92620D-16 |
| 47 | a'  | 727.75  | YES | 0.000020  | 0.017310 | 0.28599D-16 | 0.21449D-16 |
| 48 | a'' | 771.43  | YES | 0.000000  | 0.004429 | 0.17204D-17 | 0.12903D-17 |
| 49 | a'  | 842.92  | YES | -0.000067 | 0.011401 | 0.10025D-16 | 0.75161D-17 |
| 50 | a'  | 845.29  | YES | -0.070978 | 0.250225 | 0.91589D-14 | 0.36055D-14 |
| 51 | a'' | 994.24  | YES | 0.000000  | 0.091478 | 0.50474D-15 | 0.37855D-15 |
| 52 | a'  | 1009.24 | YES | 0.107806  | 0.362206 | 0.15445D-13 | 0.58015D-14 |
| 53 | a'  | 1080.65 | YES | 0.000016  | 0.011801 | 0.73945D-17 | 0.55458D-17 |
| 54 | a'' | 1090.51 | YES | 0.000000  | 0.053685 | 0.15089D-15 | 0.11316D-15 |
| 55 | a'  | 1170.93 | YES | 0.254974  | 0.761339 | 0.61379D-13 | 0.20353D-13 |
| 56 | a'  | 1186.70 | YES | 0.000117  | 0.017677 | 0.14327D-16 | 0.10740D-16 |
| 57 | a'' | 1199.28 | YES | 0.000000  | 0.008147 | 0.29911D-17 | 0.22433D-17 |
| 58 | a'' | 1232.10 | YES | 0.000000  | 0.162933 | 0.11454D-14 | 0.85905D-15 |
| 59 | a'' | 1321.47 | YES | 0.000000  | 0.077983 | 0.23389D-15 | 0.17542D-15 |
| 60 | a'  | 1342.46 | YES | 0.153518  | 0.545947 | 0.21098D-13 | 0.83741D-14 |
| 61 | a'' | 1345.46 | YES | 0.000000  | 0.149164 | 0.83039D-15 | 0.62279D-15 |
| 62 | a'  | 1348.04 | YES | 0.000404  | 0.012669 | 0.60397D-17 | 0.44785D-17 |
| 63 | a'' | 1366.22 | YES | 0.000000  | 0.040771 | 0.60459D-16 | 0.45344D-16 |
| 64 | a'  | 1376.16 | YES | -0.730170 | 2.908748 | 0.51947D-12 | 0.22798D-12 |
| 65 | a'  | 1438.61 | YES | -0.000107 | 0.055441 | 0.10236D-15 | 0.76764D-16 |
| 66 | a'' | 1459.12 | YES | 0.000000  | 0.117410 | 0.44789D-15 | 0.33592D-15 |
| 67 | a'' | 1459.68 | YES | 0.000000  | 0.112211 | 0.40883D-15 | 0.30662D-15 |
| 68 | a'  | 1512.62 | YES | 0.049561  | 0.479747 | 0.78624D-14 | 0.52647D-14 |
| 69 | a'' | 1540.29 | YES | 0.000000  | 0.582752 | 0.10029D-13 | 0.75215D-14 |
| 70 | a'' | 1540.37 | YES | 0.000000  | 0.066891 | 0.13212D-15 | 0.99092D-16 |
| 71 | a'  | 1555.70 | YES | -0.148888 | 0.238180 | 0.88799D-14 | 0.12342D-14 |
| 72 | a'  | 1566.07 | YES | 0.000198  | 0.005102 | 0.75887D-18 | 0.55966D-18 |

## 16. References

### References

- 1 A. Martens, P. Weis, M. C. Krummer, M. Kreuzer, A. Meierhöfer, S. C. Meier, J. Bohnenberger, H. Scherer, I. Riddellstone and I. Krossing, *Chem. Sci.*, 2018, **9**, 7058.
- 2 K. Herb, R. Tschaggelar, G. Denninger and G. Jeschke, *J. Magn. Reson.*, 2018, **289**, 100.
- 3 S. Stoll and A. Schweiger, *J. Magn. Reson.*, 2006, **178**, 42.
- 4 F. Neese, *WIREs Comput. Mol. Sci.*, 2018, **8**, e1327.
- 5 G. M. Sheldrick, *Acta Cryst. A*, 2015, **71**, 3.
- 6 G. M. Sheldrick, *Acta Cryst. C*, 2015, **71**, 3.
- 7 C. B. Hübschle, G. M. Sheldrick and B. Dittrich, *J. Appl. Cryst.*, 2011, **44**, 1281.
- 8 a) D. Kratzert, J. J. Holstein and I. Krossing, *J. Appl. Cryst.*, 2015, **48**, 933; b) D. Kratzert and I. Krossing, *J. Appl. Cryst.*, 2018, **51**, 928;
- 9 FinalCif, <https://www.xs3.uni-freiburg.de/research/finalcif>.
- 10 C. F. Macrae, I. Sovago, S. J. Cottrell, P. T. A. Galek, P. McCabe, E. Pidcock, M. Platings, G. P. Shields, J. S. Stevens, M. Towler and P. A. Wood, *J. Appl. Cryst.*, 2020, **53**, 226.
- 11 C. R. Groom, I. J. Bruno, M. P. Lightfoot and S. C. Ward, *Acta Cryst. B*, 2016, **72**, 171.
- 12 a) M. von Arnim and R. Ahlrichs, *J. Comput. Chem.*, 1998, **19**, 1746; b) O. Treutler and R. Ahlrichs, *J. Chem. Phys.*, 1995, **102**, 346;
- 13 a) A. D. Becke, *J. Chem. Phys.*, 1993, **98**, 1372; b) Lee, Yang and Parr, *Phys. Rev. B Condens. Matter*, 1988, **37**, 785;
- 14 F. Weigend and R. Ahlrichs, *Phys. Chem. Chem. Phys.*, 2005, **7**, 3297.
- 15 a) M. Sierka, A. Hogekamp and R. Ahlrichs, *J. Chem. Phys.*, 2003, **118**, 9136; b) F. Weigend, *Phys. Chem. Chem. Phys.*, 2006, **8**, 1057; c) R. Ahlrichs, *Phys. Chem. Chem. Phys.*, 2004, **6**, 5119;
- 16 S. Grimme, S. Ehrlich and L. Goerigk, *J. Comput. Chem.*, 2011, **32**, 1456.
- 17 P. Deglmann, F. Furche and R. Ahlrichs, *Chem. Phys. Lett.*, 2002, **362**, 511.
- 18 T. Lu and F. Chen, *J. Comput. Chem.*, 2012, **33**, 580.
- 19 Theoretical Chemistry, Vrije Universiteit Amsterdam, The Netherlands, ADF, 2010-2016.
- 20 M. K. Assefa, J. L. Devera, A. D. Brathwaite, J. D. Mosley and M. A. Duncan, *Chem. Phys. Lett.*, 2015, **640**, 175.
- 21 F. A. Cotton and C. S. Kraihanzel, *J. Am. Chem. Soc.*, 1962, **84**, 4432.
